# Supplementary material for: Avian-specific Salmonella transition to endemicity is accompanied by localized resistome and mobilome interaction
Source: eLife. 2025 Mar 4;13:RP101241. doi: 10.7554/eLife.101241 (PMC11879110; doi:10.7554/eLife.101241)
Supplement: Supplementary file 2. [file elife-101241-supp2.xlsx]

## Sheet: Sheet1
Strain_name	Serovar	Biovar	Lineage	Continent	Country	Year	Data source
GCA_000801935.1	Gallinarum	Gallinarum	bvSG	Asia	India	2012	Public database
SAL_JA0795AA	Gallinarum	Gallinarum	bvSG	North America	USA	1991	Public database
ERS003159	Gallinarum	Gallinarum	bvSG	Not collected	Not collected	2010	Public database
ERS003157	Gallinarum	Gallinarum	bvSG	Europe	Denmark	1993	Public database
SAL_XA0354AA	Gallinarum	Gallinarum	bvSG	North America	USA	2012	Public database
SAL_EA2453AA	Gallinarum	Gallinarum	bvSG	North America	USA	1972	Public database
SRS4767865	Gallinarum	Gallinarum	bvSG	North America	USA	1972	Public database
SAL_LA6164AA	Gallinarum	Gallinarum	bvSG	North America	USA	1972	Public database
SAL_FB6660AA	Gallinarum	Gallinarum	bvSG	South America	Brazil	2015	Public database
SAL_FA6373AA	Gallinarum	Gallinarum	bvSG	Not collected	Not collected	1938	Public database
SAL_EA5184AA	Gallinarum	Gallinarum	bvSG	Not collected	Not collected	1940	Public database
SAL_EA4801AA	Gallinarum	Gallinarum	bvSG	North America	Belize	2011	Public database
SAL_NB7200AA	Gallinarum	Gallinarum	bvSG	North America	Mexico	2013	Public database
GCA_014840155.1	Gallinarum	Gallinarum	bvSG	North America	Mexico	2020	Public database
GCA_000192125.1	Gallinarum	Gallinarum	bvSG	Europe	UK	1995	Public database
SAL_LC7433AA	Gallinarum	Gallinarum	bvSG	Africa	Nigeria	2018	Public database
SAL_NB4530AA	Gallinarum	Gallinarum	bvSG	Africa	Nigeria	2018	Public database
SAL_NB5293AA	Gallinarum	Gallinarum	bvSG	Africa	Nigeria	2018	Public database
SAL_NB4528AA	Gallinarum	Gallinarum	bvSG	Africa	Nigeria	2018	Public database
SAL_NB5202AA	Gallinarum	Gallinarum	bvSG	Africa	Nigeria	2018	Public database
SAL_NB5236AA	Gallinarum	Gallinarum	bvSG	Africa	Nigeria	2018	Public database
SAL_NB4533AA	Gallinarum	Gallinarum	bvSG	Africa	Nigeria	2018	Public database
SAL_EA2452AA	Gallinarum	Gallinarum	bvSG	Europe	Germany	2001	Public database
SAL_WB8296AA	Gallinarum	Gallinarum	bvSG	Europe	Germany	2001	Public database
SAL_FB6633AA	Gallinarum	Gallinarum	bvSG	South America	Brazil	2015	Public database
SAL_FB6628AA	Gallinarum	Gallinarum	bvSG	South America	Brazil	2014	Public database
SAL_DB0808AA	Gallinarum	Gallinarum	bvSG	South America	Brazil	2017	Public database
SAL_FB6686AA	Gallinarum	Gallinarum	bvSG	South America	Brazil	2017	Public database
SAL_FB6682AA	Gallinarum	Gallinarum	bvSG	South America	Brazil	2017	Public database
SAL_FB6655AA	Gallinarum	Gallinarum	bvSG	South America	Brazil	2014	Public database
GCA_001484835.1	Gallinarum	Gallinarum	bvSG	South America	Brazil	2014	Public database
SAL_JB5020AA	Gallinarum	Gallinarum	bvSG	South America	Brazil	2014	Public database
SAL_JB0866AA	Gallinarum	Gallinarum	bvSG	South America	Brazil	2018	Public database
SAL_JB0851AA	Gallinarum	Gallinarum	bvSG	South America	Brazil	2017	Public database
SAL_JB0848AA	Gallinarum	Gallinarum	bvSG	South America	Brazil	2018	Public database
GCA_004120875.1	Gallinarum	Gallinarum	bvSG	South America	Colombia	2017	Public database
GCA_004120895.1	Gallinarum	Gallinarum	bvSG	South America	Colombia	2017	Public database
GCA_004120935.1	Gallinarum	Gallinarum	bvSG	South America	Colombia	2017	Public database
GCA_004120865.1	Gallinarum	Gallinarum	bvSG	South America	Colombia	2017	Public database
SAL_ZA6276AA	Gallinarum	Gallinarum	bvSG	Europe	UK	2016	Public database
GCA_001448635.1	Gallinarum	Gallinarum	bvSG	Europe	UK	2009	Public database
Gallinarum_ST331	Gallinarum	Gallinarum	bvSG	South America	Brazil	2010	Public database
SAL_PA7699AA	Gallinarum	Pullorum	L1	Asia	China	2008	Public database
SAL_PA7740AA	Gallinarum	Pullorum	L1	Asia	China	1968	Public database
ERS2630790	Gallinarum	Pullorum	L1	Asia	China	1973	Public database
GCA_000486745.1	Gallinarum	Pullorum	L2a	North America	Canada	2012	Public database
SAL_IB1374AA	Gallinarum	Pullorum	L2a	Europe	UK	2018	Public database
SAL_EA5139AA	Gallinarum	Pullorum	L2a	Not collected	Not collected	1938	Public database
SAL_KA3410AA	Gallinarum	Pullorum	L2a	Europe	UK	1994	Public database
SAL_HB1901AA	Gallinarum	Pullorum	L2a	Europe	UK	2018	Public database
SAL_FA6266AA	Gallinarum	Pullorum	L2a	Not collected	Not collected	1938	Public database
SAL_FB6666AA	Gallinarum	Pullorum	L2a	South America	Brazil	2017	Public database
GCA_000484295.1	Gallinarum	Pullorum	L2a	Not collected	Not collected	1990	Public database
SAL_EA5204AA	Gallinarum	Pullorum	L2a	Not collected	Not collected	1938	Public database
SAL_EA4800AA	Gallinarum	Pullorum	L2a	Not collected	Not collected	1999	Public database
SAL_LA6324AA	Gallinarum	Pullorum	L2a	North America	USA	1998	Public database
SAL_PA7982AA	Gallinarum	Pullorum	L2a	South America	Brazil	2001	Public database
SAL_PA7743AA	Gallinarum	Pullorum	L2a	South America	Brazil	1999	Public database
SAL_BB3471AA	Gallinarum	Pullorum	L2a	South America	Brazil	2014	Public database
SAL_FB6647AA	Gallinarum	Pullorum	L2a	South America	Brazil	2015	Public database
SAL_FB6635AA	Gallinarum	Pullorum	L2a	South America	Brazil	2017	Public database
GCA_000330485.2	Gallinarum	Pullorum	L2a	North America	USA	2012	Public database
ERS2630796	Gallinarum	Pullorum	L2a	South America	Brazil	2000	Public database
SAL_FB2385AA	Gallinarum	Pullorum	L2a	Not collected	Not collected	2017	Public database
GCA_015024685.1	Gallinarum	Pullorum	L2a	Europe	Germany	2013	Public database
SAL_WB8172AA	Gallinarum	Pullorum	L2a	Not collected	Not collected	2019	Public database
SAL_PA7979AA	Gallinarum	Pullorum	L2a	South America	Brazil	1966	Public database
SAL_EB9539AA	Gallinarum	Pullorum	L2a	Not collected	Not collected	2018	Public database
GCA_000521885.1	Gallinarum	Pullorum	L2a	South America	Brazil	2008	Public database
SAL_EA4799AA	Gallinarum	Pullorum	L2a	North America	USA	2011	Public database
SAL_LA5175AA	Gallinarum	Pullorum	L2a	North America	USA	2004	Public database
SRS1039523	Gallinarum	Pullorum	L2a	Not collected	Not collected	2004	Public database
GCA_000462995.1	Gallinarum	Pullorum	L2a	Asia	China	1983	Public database
SAL_PA7969AA	Gallinarum	Pullorum	L2a	Europe	UK	1993	Public database
SAL_IC1631AA	Gallinarum	Pullorum	L2a	Europe	Germany	2004	Public database
SAL_WB7906AA	Gallinarum	Pullorum	L2a	Not collected	Not collected	2019	Public database
SAL_PA7731AA	Gallinarum	Pullorum	L2a	Europe	UK	1985	Public database
GCA_001448575.1	Gallinarum	Pullorum	L2a	Europe	UK	2007	Public database
SAL_PA7972AA	Gallinarum	Pullorum	L2a	Europe	UK	1986	Public database
SAL_PA7981AA	Gallinarum	Pullorum	L2a	Europe	UK	1986	Public database
SAL_PA7717AA	Gallinarum	Pullorum	L2b	Asia	China	1973	Public database
SAL_PA7756AA	Gallinarum	Pullorum	L2b	Asia	China	1971	Public database
SAL_PA7721AA	Gallinarum	Pullorum	L2b	Asia	China	1968	Public database
SAL_PA7742AA	Gallinarum	Pullorum	L2b	Asia	China	1982	Public database
SAL_PA7692AA	Gallinarum	Pullorum	L2b	Asia	China	1962	Public database
SAL_CB8582AA	Gallinarum	Pullorum	L2b	Europe	UK	2016	Public database
SAL_PA7980AA	Gallinarum	Pullorum	L2b	Europe	Denmark	1949	Public database
ERS2630773	Gallinarum	Pullorum	L2b	Europe	Denmark	1949	Public database
SAL_PA7978AA	Gallinarum	Pullorum	L2b	Europe	UK	1953	Public database
ERS2630810	Gallinarum	Pullorum	L2b	Europe	UK	1986	Public database
SAL_PA7738AA	Gallinarum	Pullorum	L2b	Europe	UK	1987	Public database
GCA_900067255.1	Gallinarum	Pullorum	L2b	Europe	UK	1987	Public database
ERS088716	Gallinarum	Pullorum	L2b	Not collected	Not collected	1987	Public database
GCA_000953595.1	Gallinarum	Pullorum	L2b	Not collected	Not collected	1987	Public database
SAL_PA7751AA	Gallinarum	Pullorum	L2b	South America	Brazil	2001	Public database
SAL_FB6640AA	Gallinarum	Pullorum	L2b	South America	Brazil	2014	Public database
ERS2630780	Gallinarum	Pullorum	L2b	South America	Brazil	1998	Public database
SAL_PA7687AA	Gallinarum	Pullorum	L2b	Asia	China	1967	Public database
SAL_PA7710AA	Gallinarum	Pullorum	L2b	Asia	China	2008	Public database
SAL_PA7704AA	Gallinarum	Pullorum	L2b	Asia	China	2013	Public database
SAL_KA3505AA	Gallinarum	Pullorum	L2b	Asia	China	2006	Public database
XXB1089	Gallinarum	Pullorum	L2b	Asia	China	2011	Public database
XXB1092	Gallinarum	Pullorum	L2b	Asia	China	2011	Public database
XXB1725	Gallinarum	Pullorum	L2b	Asia	China	2017	Public database
SRR26663521	Gallinarum	Pullorum	L2b	Asia	China	2022	Public database
SAL_PA7698AA	Gallinarum	Pullorum	L3c	Asia	China	2008	Public database
SAL_PA7696AA	Gallinarum	Pullorum	L3c	Asia	China	2009	Public database
SAL_PA7729AA	Gallinarum	Pullorum	L3c	Asia	China	2009	Public database
SAL_PA7723AA	Gallinarum	Pullorum	L3c	Asia	China	2009	Public database
SAL_PA7719AA	Gallinarum	Pullorum	L3c	Asia	China	2009	Public database
SAL_PA7686AA	Gallinarum	Pullorum	L3c	Asia	China	2009	Public database
SAL_GB9917AA	Gallinarum	Pullorum	L3c	Asia	China	2017	Public database
ERS2630811	Gallinarum	Pullorum	L3c	Asia	China	2014	Public database
SAL_UA3243AA	Gallinarum	Pullorum	L3c	Asia	China	2014	Public database
SAL_PA7745AA	Gallinarum	Pullorum	L3c	Asia	China	2014	Public database
SAL_PA7701AA	Gallinarum	Pullorum	L3c	Asia	China	2014	Public database
SAL_PA7730AA	Gallinarum	Pullorum	L3c	Asia	China	2014	Public database
SAL_PA7759AA	Gallinarum	Pullorum	L3c	Asia	China	2014	Public database
SRR26662937	Gallinarum	Pullorum	L3c	Asia	China	2022	Public database
SAL_PA7720AA	Gallinarum	Pullorum	L3b	Asia	China	1967	Public database
ERS2630722	Gallinarum	Pullorum	L3b	Asia	China	1967	Public database
ERS2630752	Gallinarum	Pullorum	L3b	Asia	China	2008	Public database
SAL_PA7974AA	Gallinarum	Pullorum	L3b	Asia	China	1998	Public database
SAL_PA7702AA	Gallinarum	Pullorum	L3b	Asia	China	2008	Public database
SAL_EA6570AA	Gallinarum	Pullorum	L3b	Not collected	Not collected	2012	Public database
SAL_FB2386AA	Gallinarum	Pullorum	L3b	Not collected	Not collected	2017	Public database
GCA_015024695.1	Gallinarum	Pullorum	L3b	Europe	Germany	2013	Public database
SAL_TA8783AA	Gallinarum	Pullorum	L3b	Europe	Germany	2004	Public database
ERS1867656	Gallinarum	Pullorum	L3b	Europe	Sweden	2012	Public database
ERS1867657	Gallinarum	Pullorum	L3b	Europe	Sweden	2012	Public database
ERS1867658	Gallinarum	Pullorum	L3b	Europe	Sweden	2012	Public database
ERS1867655	Gallinarum	Pullorum	L3b	Europe	Sweden	2012	Public database
SAL_FB2387AA	Gallinarum	Pullorum	L3b	Not collected	Not collected	2017	Public database
GCA_015024675.1	Gallinarum	Pullorum	L3b	Europe	Germany	2013	Public database
SAL_FB2384AA	Gallinarum	Pullorum	L3b	Not collected	Not collected	2017	Public database
GCA_015024735.1	Gallinarum	Pullorum	L3b	Europe	Germany	2013	Public database
SAL_RB4559AA	Gallinarum	Pullorum	L3b	Europe	Denmark	2019	Public database
SAL_RB4558AA	Gallinarum	Pullorum	L3b	Europe	Denmark	2019	Public database
ERS1867654	Gallinarum	Pullorum	L3b	Europe	Sweden	2012	Public database
ERS1867653	Gallinarum	Pullorum	L3b	Europe	Sweden	2012	Public database
SAL_PA7968AA	Gallinarum	Pullorum	L3b	Europe	Denmark	1952	Public database
ERS2630739	Gallinarum	Pullorum	L3b	Asia	China	1998	Public database
SAL_PA7747AA	Gallinarum	Pullorum	L3b	Asia	China	1998	Public database
SAL_PA7693AA	Gallinarum	Pullorum	L3b	Asia	China	2012	Public database
SAL_PA7983AA	Gallinarum	Pullorum	L3b	Asia	China	2007	Public database
SAL_PA7757AA	Gallinarum	Pullorum	L3b	Asia	China	2008	Public database
SAL_PA6310AA	Gallinarum	Pullorum	L3b	Asia	China	1962	Public database
SAL_PA7741AA	Gallinarum	Pullorum	L3b	Asia	China	1965	Public database
SAL_PA0702AA	Gallinarum	Pullorum	L3b	Asia	China	1962	Public database
SAL_PA7694AA	Gallinarum	Pullorum	L3b	Asia	China	2014	Public database
ERS2630720	Gallinarum	Pullorum	L3b	Asia	China	1965	Public database
SAL_PA7713AA	Gallinarum	Pullorum	L3b	Asia	China	1965	Public database
SAL_PA7973AA	Gallinarum	Pullorum	L3b	Asia	China	1965	Public database
ERS2630718	Gallinarum	Pullorum	L3b	Asia	China	1962	Public database
SAL_PA7749AA	Gallinarum	Pullorum	L3b	Asia	China	1967	Public database
ERS2630738	Gallinarum	Pullorum	L3b	Asia	China	1998	Public database
SAL_PA7977AA	Gallinarum	Pullorum	L3b	Asia	China	2006	Public database
SAL_PA7733AA	Gallinarum	Pullorum	L3b	Asia	China	2013	Public database
ERS2630765	Gallinarum	Pullorum	L3b	Asia	China	2013	Public database
SAL_PA7755AA	Gallinarum	Pullorum	L3b	Asia	China	2012	Public database
SAL_PA7746AA	Gallinarum	Pullorum	L3b	Asia	China	2012	Public database
SAL_PA7736AA	Gallinarum	Pullorum	L3b	Asia	China	2004	Public database
SAL_PA7722AA	Gallinarum	Pullorum	L3b	Asia	China	1997	Public database
SAL_PA7689AA	Gallinarum	Pullorum	L3b	Asia	China	2013	Public database
SAL_PA7724AA	Gallinarum	Pullorum	L3b	Asia	China	1998	Public database
SAL_PA7976AA	Gallinarum	Pullorum	L3b	Asia	China	2003	Public database
SAL_PA7700AA	Gallinarum	Pullorum	L3b	Asia	China	1998	Public database
SAL_PA7725AA	Gallinarum	Pullorum	L3b	Asia	China	1993	Public database
SAL_PA7695AA	Gallinarum	Pullorum	L3b	Asia	China	1998	Public database
SAL_PA7975AA	Gallinarum	Pullorum	L3b	Asia	China	1971	Public database
SAL_PA7754AA	Gallinarum	Pullorum	L3b	Asia	China	1986	Public database
ERS2630728	Gallinarum	Pullorum	L3b	Asia	China	1986	Public database
ERS2630724	Gallinarum	Pullorum	L3b	Asia	China	1968	Public database
SAL_PA7711AA	Gallinarum	Pullorum	L3b	Asia	China	1980	Public database
SAL_PA7758AA	Gallinarum	Pullorum	L3b	Asia	China	1973	Public database
ERS2630735	Gallinarum	Pullorum	L3b	Asia	China	1985	Public database
SAL_PA7705AA	Gallinarum	Pullorum	L3b	Asia	China	1978	Public database
ERS2630732	Gallinarum	Pullorum	L3b	Asia	China	1973	Public database
ERS2630729	Gallinarum	Pullorum	L3b	Asia	China	1986	Public database
SAL_PA7706AA	Gallinarum	Pullorum	L3b	Asia	China	1979	Public database
SAL_PA7734AA	Gallinarum	Pullorum	L3b	Asia	China	1994	Public database
SAL_PA7708AA	Gallinarum	Pullorum	L3b	Asia	China	1986	Public database
SAL_PA7718AA	Gallinarum	Pullorum	L3b	Asia	China	2014	Public database
SAL_PA7727AA	Gallinarum	Pullorum	L3b	Asia	China	1998	Public database
SAL_PA7971AA	Gallinarum	Pullorum	L3b	Asia	China	1998	Public database
SAL_PA7716AA	Gallinarum	Pullorum	L3b	Asia	China	2003	Public database
SAL_PA7753AA	Gallinarum	Pullorum	L3b	Asia	China	2005	Public database
SAL_PA7707AA	Gallinarum	Pullorum	L3b	Asia	China	2012	Public database
SAL_PA7703AA	Gallinarum	Pullorum	L3b	Asia	China	2008	Public database
SAL_PA7970AA	Gallinarum	Pullorum	L3b	Asia	China	2009	Public database
SAL_PA7737AA	Gallinarum	Pullorum	L3b	Asia	China	2008	Public database
ERS2630744	Gallinarum	Pullorum	L3b	Asia	China	2006	Public database
SAL_PA7750AA	Gallinarum	Pullorum	L3b	Asia	China	2008	Public database
SAL_PA7752AA	Gallinarum	Pullorum	L3b	Asia	China	2014	Public database
SRR24215034	Gallinarum	Pullorum	L3b	Europe	Netherland	2021	Public database
SRR24215035	Gallinarum	Pullorum	L3b	Europe	Netherland	2021	Public database
SRR24215036	Gallinarum	Pullorum	L3b	Europe	Netherland	2021	Public database
SRR24215037	Gallinarum	Pullorum	L3b	Europe	Netherland	2021	Public database
SRR24215038	Gallinarum	Pullorum	L3b	Europe	Netherland	2021	Public database
SRR24215039	Gallinarum	Pullorum	L3b	Europe	Netherland	2021	Public database
SRR24215040	Gallinarum	Pullorum	L3b	Europe	Netherland	2021	Public database
SRR24215041	Gallinarum	Pullorum	L3b	Europe	Netherland	2021	Public database
SRR24215042	Gallinarum	Pullorum	L3b	Europe	Netherland	2021	Public database
SRR24215043	Gallinarum	Pullorum	L3b	Europe	Netherland	2021	Public database
SRR24215044	Gallinarum	Pullorum	L3b	Europe	Netherland	2021	Public database
SRR24215045	Gallinarum	Pullorum	L3b	Europe	Netherland	2021	Public database
SRR24215046	Gallinarum	Pullorum	L3b	Europe	Netherland	2021	Public database
SRR24215047	Gallinarum	Pullorum	L3b	Europe	Netherland	2021	Public database
SRR24215048	Gallinarum	Pullorum	L3b	Europe	Netherland	2021	Public database
SRR24215049	Gallinarum	Pullorum	L3b	Europe	Netherland	2021	Public database
P125109	Enteritidis	Enteritidis	SE	Europe	UK	1988	Public database
01-00493-2	Enteritidis	Enteritidis	SE	Europe	Germany	2001	Public database
SARB18	Enteritidis	Enteritidis	SE	North America	USA	1988	Public database
118_2012K	Enteritidis	Enteritidis	SE	North America	USA	2012	Public database
105_2011K	Enteritidis	Enteritidis	SE	North America	USA	2011	Public database
WS752_S17	Gallinarum	Duisburg	bvSD	Not collected	Not collected	< 1968	Public database (Laboratory pre-uploaded)
WS748_S14	Gallinarum	Duisburg	bvSD	Not collected	Not collected	< 1948	Public database (Laboratory pre-uploaded)
MY0187	Gallinarum	Gallinarum	bvSG	Asia	China	1991	Public database (Laboratory pre-uploaded)
MY0329	Gallinarum	Gallinarum	bvSG	Europe	UK	1953	Public database (Laboratory pre-uploaded)
WS0751_S68	Gallinarum	Gallinarum	bvSG	Europe	UK	1950s	Public database (Laboratory pre-uploaded)
SAL03393	Gallinarum	Gallinarum	bvSG	Asia	China	1973	Public database (Laboratory pre-uploaded)
WS0745_S161	Gallinarum	Gallinarum	bvSG	Not collected	Not collected	<1925	Public database (Laboratory pre-uploaded)
MY0330	Gallinarum	Gallinarum	bvSG	Europe	UK	1967	Public database (Laboratory pre-uploaded)
MY0331	Gallinarum	Gallinarum	bvSG	South America	Brazil	1991	Public database (Laboratory pre-uploaded)
MY0328	Gallinarum	Gallinarum	bvSG	North America	USA	1920	Public database (Laboratory pre-uploaded)
SAL03395	Gallinarum	Pullorum	L1	Asia	China	2011	Public database (Laboratory pre-uploaded)
6801	Gallinarum	Pullorum	L1	Asia	China	1985	Public database (Laboratory pre-uploaded)
7808	Gallinarum	Pullorum	L1	Asia	China	1985	Public database (Laboratory pre-uploaded)
7904	Gallinarum	Pullorum	L1	Asia	China	1985	Public database (Laboratory pre-uploaded)
7310	Gallinarum	Pullorum	L1	Asia	China	1985	Public database (Laboratory pre-uploaded)
SAL03394	Gallinarum	Pullorum	L1	Asia	China	1995	Public database (Laboratory pre-uploaded)
MY0186	Gallinarum	Pullorum	L1	Asia	China	1985	Public database (Laboratory pre-uploaded)
MY0332	Gallinarum	Pullorum	L2a	Europe	Denmark	1939	Public database (Laboratory pre-uploaded)
MY0188	Gallinarum	Pullorum	L2a	Asia	China	1984	Public database (Laboratory pre-uploaded)
WS755_S18	Gallinarum	Pullorum	L2a	Not collected	Not collected	< 1968	Public database (Laboratory pre-uploaded)
WS0750bis_S199	Gallinarum	Pullorum	L2a	Not collected	Not collected	< 1968	Public database (Laboratory pre-uploaded)
SAL03405	Gallinarum	Pullorum	L2a	Asia	China	2018	Public database (Laboratory pre-uploaded)
WS0754_S49	Gallinarum	Pullorum	L2a	Not collected	Not collected	< 1968	Public database (Laboratory pre-uploaded)
WS0753_S48	Gallinarum	Pullorum	L2a	Europe	UK	< 1968	Public database (Laboratory pre-uploaded)
WS749_S15	Gallinarum	Pullorum	L2a	Not collected	Not collected	< 1968	Public database (Laboratory pre-uploaded)
WS747_S13	Gallinarum	Pullorum	L2a	Not collected	Not collected	< 1967	Public database (Laboratory pre-uploaded)
MY0335	Gallinarum	Pullorum	L2a	Europe	UK	1970	Public database (Laboratory pre-uploaded)
SAL00715	Gallinarum	Pullorum	L2b	Asia	China	2014	Public database (Laboratory pre-uploaded)
MY0333	Gallinarum	Pullorum	L2b	Europe	UK	1970	Public database (Laboratory pre-uploaded)
MY0334	Gallinarum	Pullorum	L2b	Europe	UK	1970	Public database (Laboratory pre-uploaded)
MY0123	Gallinarum	Pullorum	L2b	Europe	Denmark	1939	Public database (Laboratory pre-uploaded)
SAL02666	Gallinarum	Pullorum	L2b	Asia	China	2011	Public database (Laboratory pre-uploaded)
SAL00731	Gallinarum	Pullorum	L2b	Asia	China	2015	Public database (Laboratory pre-uploaded)
SAL00730	Gallinarum	Pullorum	L2b	Asia	China	2015	Public database (Laboratory pre-uploaded)
X67	Gallinarum	Pullorum	L2b	Asia	China	2022	Public database (Laboratory pre-uploaded)
X38	Gallinarum	Pullorum	L2b	Asia	China	2022	Public database (Laboratory pre-uploaded)
X6	Gallinarum	Pullorum	L2b	Asia	China	2022	Public database (Laboratory pre-uploaded)
X49	Gallinarum	Pullorum	L2b	Asia	China	2022	Public database (Laboratory pre-uploaded)
X93	Gallinarum	Pullorum	L2b	Asia	China	2022	Public database (Laboratory pre-uploaded)
X166	Gallinarum	Pullorum	L2b	Asia	China	2022	Public database (Laboratory pre-uploaded)
X84	Gallinarum	Pullorum	L2b	Asia	China	2022	Public database (Laboratory pre-uploaded)
X215	Gallinarum	Pullorum	L2b	Asia	China	2022	Public database (Laboratory pre-uploaded)
X156	Gallinarum	Pullorum	L2b	Asia	China	2022	Public database (Laboratory pre-uploaded)
X177-2	Gallinarum	Pullorum	L2b	Asia	China	2022	Public database (Laboratory pre-uploaded)
X79	Gallinarum	Pullorum	L2b	Asia	China	2022	Public database (Laboratory pre-uploaded)
X169	Gallinarum	Pullorum	L2b	Asia	China	2022	Public database (Laboratory pre-uploaded)
X230	Gallinarum	Pullorum	L2b	Asia	China	2022	Public database (Laboratory pre-uploaded)
X153	Gallinarum	Pullorum	L2b	Asia	China	2022	Public database (Laboratory pre-uploaded)
X5	Gallinarum	Pullorum	L2b	Asia	China	2022	Public database (Laboratory pre-uploaded)
X177	Gallinarum	Pullorum	L2b	Asia	China	2022	Public database (Laboratory pre-uploaded)
X130	Gallinarum	Pullorum	L2b	Asia	China	2022	Public database (Laboratory pre-uploaded)
X216	Gallinarum	Pullorum	L2b	Asia	China	2022	Public database (Laboratory pre-uploaded)
X140	Gallinarum	Pullorum	L2b	Asia	China	2022	Public database (Laboratory pre-uploaded)
X237	Gallinarum	Pullorum	L2b	Asia	China	2022	Public database (Laboratory pre-uploaded)
X105	Gallinarum	Pullorum	L2b	Asia	China	2022	Public database (Laboratory pre-uploaded)
X2	Gallinarum	Pullorum	L2b	Asia	China	2022	Public database (Laboratory pre-uploaded)
X135	Gallinarum	Pullorum	L2b	Asia	China	2022	Public database (Laboratory pre-uploaded)
X186-2	Gallinarum	Pullorum	L2b	Asia	China	2022	Public database (Laboratory pre-uploaded)
X80	Gallinarum	Pullorum	L2b	Asia	China	2022	Public database (Laboratory pre-uploaded)
X134	Gallinarum	Pullorum	L2b	Asia	China	2022	Public database (Laboratory pre-uploaded)
X26	Gallinarum	Pullorum	L2b	Asia	China	2022	Public database (Laboratory pre-uploaded)
X13	Gallinarum	Pullorum	L2b	Asia	China	2022	Public database (Laboratory pre-uploaded)
X17	Gallinarum	Pullorum	L2b	Asia	China	2022	Public database (Laboratory pre-uploaded)
X145	Gallinarum	Pullorum	L2b	Asia	China	2022	Public database (Laboratory pre-uploaded)
X195	Gallinarum	Pullorum	L2b	Asia	China	2022	Public database (Laboratory pre-uploaded)
X159	Gallinarum	Pullorum	L2b	Asia	China	2022	Public database (Laboratory pre-uploaded)
X129	Gallinarum	Pullorum	L2b	Asia	China	2022	Public database (Laboratory pre-uploaded)
X10	Gallinarum	Pullorum	L2b	Asia	China	2022	Public database (Laboratory pre-uploaded)
X207	Gallinarum	Pullorum	L2b	Asia	China	2022	Public database (Laboratory pre-uploaded)
X124	Gallinarum	Pullorum	L2b	Asia	China	2022	Public database (Laboratory pre-uploaded)
X113	Gallinarum	Pullorum	L2b	Asia	China	2022	Public database (Laboratory pre-uploaded)
X82	Gallinarum	Pullorum	L2b	Asia	China	2022	Public database (Laboratory pre-uploaded)
X65	Gallinarum	Pullorum	L2b	Asia	China	2022	Public database (Laboratory pre-uploaded)
X19	Gallinarum	Pullorum	L2b	Asia	China	2022	Public database (Laboratory pre-uploaded)
X170	Gallinarum	Pullorum	L2b	Asia	China	2022	Public database (Laboratory pre-uploaded)
X98	Gallinarum	Pullorum	L2b	Asia	China	2022	Public database (Laboratory pre-uploaded)
X176	Gallinarum	Pullorum	L2b	Asia	China	2022	Public database (Laboratory pre-uploaded)
X89	Gallinarum	Pullorum	L2b	Asia	China	2022	Public database (Laboratory pre-uploaded)
X187	Gallinarum	Pullorum	L2b	Asia	China	2022	Public database (Laboratory pre-uploaded)
X206	Gallinarum	Pullorum	L2b	Asia	China	2022	Public database (Laboratory pre-uploaded)
X97	Gallinarum	Pullorum	L2b	Asia	China	2022	Public database (Laboratory pre-uploaded)
X90	Gallinarum	Pullorum	L2b	Asia	China	2022	Public database (Laboratory pre-uploaded)
X186	Gallinarum	Pullorum	L2b	Asia	China	2022	Public database (Laboratory pre-uploaded)
X165	Gallinarum	Pullorum	L2b	Asia	China	2022	Public database (Laboratory pre-uploaded)
SAL03507	Gallinarum	Pullorum	L2b	Asia	China	2019	Public database (Laboratory pre-uploaded)
SAL03497	Gallinarum	Pullorum	L2b	Asia	China	2019	Public database (Laboratory pre-uploaded)
SAL00732	Gallinarum	Pullorum	L2b	Asia	China	2015	Public database (Laboratory pre-uploaded)
SAL00733	Gallinarum	Pullorum	L2b	Asia	China	2015	Public database (Laboratory pre-uploaded)
SAL00728	Gallinarum	Pullorum	L2b	Asia	China	2015	Public database (Laboratory pre-uploaded)
SAL00729	Gallinarum	Pullorum	L2b	Asia	China	2015	Public database (Laboratory pre-uploaded)
SAL00726	Gallinarum	Pullorum	L2b	Asia	China	2015	Public database (Laboratory pre-uploaded)
SAL00722	Gallinarum	Pullorum	L2b	Asia	China	2015	Public database (Laboratory pre-uploaded)
SAL03506	Gallinarum	Pullorum	L2b	Asia	China	2019	Public database (Laboratory pre-uploaded)
SAL03496	Gallinarum	Pullorum	L2b	Asia	China	2019	Public database (Laboratory pre-uploaded)
SAL02672	Gallinarum	Pullorum	L2b	Asia	China	2011	Public database (Laboratory pre-uploaded)
SAL02673	Gallinarum	Pullorum	L2b	Asia	China	2011	Public database (Laboratory pre-uploaded)
SAL02668	Gallinarum	Pullorum	L2b	Asia	China	2011	Public database (Laboratory pre-uploaded)
SAL02670	Gallinarum	Pullorum	L2b	Asia	China	2011	Public database (Laboratory pre-uploaded)
SAL02669	Gallinarum	Pullorum	L2b	Asia	China	2011	Public database (Laboratory pre-uploaded)
SAL02667	Gallinarum	Pullorum	L2b	Asia	China	2011	Public database (Laboratory pre-uploaded)
SAL02671	Gallinarum	Pullorum	L2b	Asia	China	2011	Public database (Laboratory pre-uploaded)
SAL04029	Gallinarum	Pullorum	L2b	Asia	China	2017	Public database (Laboratory pre-uploaded)
SAL04095	Gallinarum	Pullorum	L2b	Asia	China	2019	Public database (Laboratory pre-uploaded)
SAL04090	Gallinarum	Pullorum	L2b	Asia	China	2019	Public database (Laboratory pre-uploaded)
SAL04094	Gallinarum	Pullorum	L2b	Asia	China	2019	Public database (Laboratory pre-uploaded)
SAL04091	Gallinarum	Pullorum	L2b	Asia	China	2019	Public database (Laboratory pre-uploaded)
SAL_PB9895AA_AS	Gallinarum	Pullorum	L2b	Europe	France	2019	Public database (Laboratory pre-uploaded)
SAL_PB9893AA_AS	Gallinarum	Pullorum	L2b	Europe	France	2018	Public database (Laboratory pre-uploaded)
SAL03402	Gallinarum	Pullorum	L2b	Asia	China	2014	Public database (Laboratory pre-uploaded)
SAL03286	Gallinarum	Pullorum	L2b	Asia	China	2015	Public database (Laboratory pre-uploaded)
SAL03437	Gallinarum	Pullorum	L2b	Asia	China	2012	Public database (Laboratory pre-uploaded)
SAL03436	Gallinarum	Pullorum	L2b	Asia	China	2012	Public database (Laboratory pre-uploaded)
SAL03439	Gallinarum	Pullorum	L2b	Asia	China	2012	Public database (Laboratory pre-uploaded)
SAL03291	Gallinarum	Pullorum	L2b	Asia	China	2015	Public database (Laboratory pre-uploaded)
SAL03303	Gallinarum	Pullorum	L2b	Asia	China	2015	Public database (Laboratory pre-uploaded)
SAL03290	Gallinarum	Pullorum	L2b	Asia	China	2015	Public database (Laboratory pre-uploaded)
SAL03307	Gallinarum	Pullorum	L2b	Asia	China	2015	Public database (Laboratory pre-uploaded)
SAL02647	Gallinarum	Pullorum	L2b	Asia	China	2017	Public database (Laboratory pre-uploaded)
SAL04028	Gallinarum	Pullorum	L2b	Asia	China	2017	Public database (Laboratory pre-uploaded)
SAL04025	Gallinarum	Pullorum	L2b	Asia	China	2017	Public database (Laboratory pre-uploaded)
SAL02649	Gallinarum	Pullorum	L2b	Asia	China	2018	Public database (Laboratory pre-uploaded)
SAL02648	Gallinarum	Pullorum	L2b	Asia	China	2018	Public database (Laboratory pre-uploaded)
SAL02650	Gallinarum	Pullorum	L2b	Asia	China	2018	Public database (Laboratory pre-uploaded)
SAL03308	Gallinarum	Pullorum	L2b	Asia	China	2015	Public database (Laboratory pre-uploaded)
SAL04026	Gallinarum	Pullorum	L2b	Asia	China	2017	Public database (Laboratory pre-uploaded)
SAL03306	Gallinarum	Pullorum	L2b	Asia	China	2015	Public database (Laboratory pre-uploaded)
SAL03448	Gallinarum	Pullorum	L3c	Asia	China	2013	Public database (Laboratory pre-uploaded)
SAL03449	Gallinarum	Pullorum	L3c	Asia	China	2013	Public database (Laboratory pre-uploaded)
SAL00717	Gallinarum	Pullorum	L3c	Asia	China	2014	Public database (Laboratory pre-uploaded)
SAL00739	Gallinarum	Pullorum	L3c	Asia	China	2017	Public database (Laboratory pre-uploaded)
SAL00738	Gallinarum	Pullorum	L3c	Asia	China	2017	Public database (Laboratory pre-uploaded)
SAL03615	Gallinarum	Pullorum	L3c	Asia	China	2020	Public database (Laboratory pre-uploaded)
SAL03453	Gallinarum	Pullorum	L3c	Asia	China	2016	Public database (Laboratory pre-uploaded)
SAL03325	Gallinarum	Pullorum	L3c	Asia	China	2015	Public database (Laboratory pre-uploaded)
SAL03593	Gallinarum	Pullorum	L3c	Asia	China	2019	Public database (Laboratory pre-uploaded)
SAL04093	Gallinarum	Pullorum	L3c	Asia	China	2019	Public database (Laboratory pre-uploaded)
SAL04092	Gallinarum	Pullorum	L3c	Asia	China	2019	Public database (Laboratory pre-uploaded)
SAL03413	Gallinarum	Pullorum	L3c	Asia	China	2018	Public database (Laboratory pre-uploaded)
SAL02677	Gallinarum	Pullorum	L3c	Asia	China	2013	Public database (Laboratory pre-uploaded)
SAL02675	Gallinarum	Pullorum	L3c	Asia	China	2013	Public database (Laboratory pre-uploaded)
SAL02681	Gallinarum	Pullorum	L3c	Asia	China	2013	Public database (Laboratory pre-uploaded)
SAL02676	Gallinarum	Pullorum	L3c	Asia	China	2013	Public database (Laboratory pre-uploaded)
SAL04019	Gallinarum	Pullorum	L3c	Asia	China	2017	Public database (Laboratory pre-uploaded)
SAL04018	Gallinarum	Pullorum	L3c	Asia	China	2017	Public database (Laboratory pre-uploaded)
SAL04020	Gallinarum	Pullorum	L3c	Asia	China	2017	Public database (Laboratory pre-uploaded)
SAL04017	Gallinarum	Pullorum	L3c	Asia	China	2017	Public database (Laboratory pre-uploaded)
SAL00746	Gallinarum	Pullorum	L3c	Asia	China	2017	Public database (Laboratory pre-uploaded)
SAL00718	Gallinarum	Pullorum	L3c	Asia	China	2014	Public database (Laboratory pre-uploaded)
SAL00708	Gallinarum	Pullorum	L3c	Asia	China	2014	Public database (Laboratory pre-uploaded)
SAL03438	Gallinarum	Pullorum	L3c	Asia	China	2012	Public database (Laboratory pre-uploaded)
SAL04099	Gallinarum	Pullorum	L3c	Asia	China	2017	Public database (Laboratory pre-uploaded)
SAL00743	Gallinarum	Pullorum	L3c	Asia	China	2017	Public database (Laboratory pre-uploaded)
SAL04101	Gallinarum	Pullorum	L3c	Asia	China	2017	Public database (Laboratory pre-uploaded)
SAL04102	Gallinarum	Pullorum	L3c	Asia	China	2017	Public database (Laboratory pre-uploaded)
SAL04100	Gallinarum	Pullorum	L3c	Asia	China	2017	Public database (Laboratory pre-uploaded)
SAL03327	Gallinarum	Pullorum	L3c	Asia	China	2015	Public database (Laboratory pre-uploaded)
SAL04032	Gallinarum	Pullorum	L3c	Asia	China	2017	Public database (Laboratory pre-uploaded)
SAL03329	Gallinarum	Pullorum	L3c	Asia	China	2015	Public database (Laboratory pre-uploaded)
SAL03326	Gallinarum	Pullorum	L3c	Asia	China	2015	Public database (Laboratory pre-uploaded)
SAL03328	Gallinarum	Pullorum	L3c	Asia	China	2015	Public database (Laboratory pre-uploaded)
SAL03330	Gallinarum	Pullorum	L3c	Asia	China	2015	Public database (Laboratory pre-uploaded)
SAL04035	Gallinarum	Pullorum	L3c	Asia	China	2017	Public database (Laboratory pre-uploaded)
SAL02659	Gallinarum	Pullorum	L3c	Asia	China	2018	Public database (Laboratory pre-uploaded)
SAL02660	Gallinarum	Pullorum	L3c	Asia	China	2018	Public database (Laboratory pre-uploaded)
SAL02661	Gallinarum	Pullorum	L3c	Asia	China	2018	Public database (Laboratory pre-uploaded)
SAL02658	Gallinarum	Pullorum	L3c	Asia	China	2018	Public database (Laboratory pre-uploaded)
SAL03429	Gallinarum	Pullorum	L3c	Asia	China	2012	Public database (Laboratory pre-uploaded)
SAL03432	Gallinarum	Pullorum	L3c	Asia	China	2014	Public database (Laboratory pre-uploaded)
SAL03427	Gallinarum	Pullorum	L3c	Asia	China	2011	Public database (Laboratory pre-uploaded)
SAL03434	Gallinarum	Pullorum	L3c	Asia	China	2009	Public database (Laboratory pre-uploaded)
SAL03451	Gallinarum	Pullorum	L3c	Asia	China	2013	Public database (Laboratory pre-uploaded)
SAL03430	Gallinarum	Pullorum	L3c	Asia	China	2012	Public database (Laboratory pre-uploaded)
SAL03452	Gallinarum	Pullorum	L3c	Asia	China	2013	Public database (Laboratory pre-uploaded)
SAL03450	Gallinarum	Pullorum	L3c	Asia	China	2013	Public database (Laboratory pre-uploaded)
SAL03435	Gallinarum	Pullorum	L3c	Asia	China	2009	Public database (Laboratory pre-uploaded)
SAL03309	Gallinarum	Pullorum	L3c	Asia	China	2015	Public database (Laboratory pre-uploaded)
SAL00737	Gallinarum	Pullorum	L3c	Asia	China	2017	Public database (Laboratory pre-uploaded)
SAL03414	Gallinarum	Pullorum	L3c	Asia	China	2018	Public database (Laboratory pre-uploaded)
SAL02674	Gallinarum	Pullorum	L3c	Asia	China	2013	Public database (Laboratory pre-uploaded)
SAL02662	Gallinarum	Pullorum	L3c	Asia	China	2018	Public database (Laboratory pre-uploaded)
SAL02664	Gallinarum	Pullorum	L3c	Asia	China	2018	Public database (Laboratory pre-uploaded)
SAL02665	Gallinarum	Pullorum	L3c	Asia	China	2018	Public database (Laboratory pre-uploaded)
SAL02653	Gallinarum	Pullorum	L3c	Asia	China	2018	Public database (Laboratory pre-uploaded)
SAL02657	Gallinarum	Pullorum	L3c	Asia	China	2018	Public database (Laboratory pre-uploaded)
SAL02663	Gallinarum	Pullorum	L3c	Asia	China	2018	Public database (Laboratory pre-uploaded)
SAL04031	Gallinarum	Pullorum	L3c	Asia	China	2017	Public database (Laboratory pre-uploaded)
SAL02652	Gallinarum	Pullorum	L3c	Asia	China	2018	Public database (Laboratory pre-uploaded)
SAL02654	Gallinarum	Pullorum	L3c	Asia	China	2018	Public database (Laboratory pre-uploaded)
SAL02656	Gallinarum	Pullorum	L3c	Asia	China	2018	Public database (Laboratory pre-uploaded)
SAL02651	Gallinarum	Pullorum	L3c	Asia	China	2018	Public database (Laboratory pre-uploaded)
SAL02678	Gallinarum	Pullorum	L3c	Asia	China	2013	Public database (Laboratory pre-uploaded)
SAL03403	Gallinarum	Pullorum	L3c	Asia	China	2014	Public database (Laboratory pre-uploaded)
SAL03401	Gallinarum	Pullorum	L3c	Asia	China	2014	Public database (Laboratory pre-uploaded)
SAL03397	Gallinarum	Pullorum	L3c	Asia	China	2014	Public database (Laboratory pre-uploaded)
SAL04096	Gallinarum	Pullorum	L3c	Asia	China	2017	Public database (Laboratory pre-uploaded)
SAL04098	Gallinarum	Pullorum	L3c	Asia	China	2017	Public database (Laboratory pre-uploaded)
SAL04097	Gallinarum	Pullorum	L3c	Asia	China	2017	Public database (Laboratory pre-uploaded)
SAL02702	Gallinarum	Pullorum	L3c	Asia	China	2018	Public database (Laboratory pre-uploaded)
SAL02699	Gallinarum	Pullorum	L3c	Asia	China	2018	Public database (Laboratory pre-uploaded)
SAL02701	Gallinarum	Pullorum	L3c	Asia	China	2018	Public database (Laboratory pre-uploaded)
SAL02698	Gallinarum	Pullorum	L3c	Asia	China	2018	Public database (Laboratory pre-uploaded)
SAL02700	Gallinarum	Pullorum	L3c	Asia	China	2018	Public database (Laboratory pre-uploaded)
SAL03426	Gallinarum	Pullorum	L3c	Asia	China	2011	Public database (Laboratory pre-uploaded)
SAL03425	Gallinarum	Pullorum	L3c	Asia	China	2011	Public database (Laboratory pre-uploaded)
SAL03431	Gallinarum	Pullorum	L3c	Asia	China	2012	Public database (Laboratory pre-uploaded)
SAL03433	Gallinarum	Pullorum	L3c	Asia	China	2014	Public database (Laboratory pre-uploaded)
SAL03428	Gallinarum	Pullorum	L3c	Asia	China	2012	Public database (Laboratory pre-uploaded)
SAL03407	Gallinarum	Pullorum	L3c	Asia	China	2018	Public database (Laboratory pre-uploaded)
SAL03411	Gallinarum	Pullorum	L3c	Asia	China	2018	Public database (Laboratory pre-uploaded)
SAL03406	Gallinarum	Pullorum	L3c	Asia	China	2018	Public database (Laboratory pre-uploaded)
SAL03409	Gallinarum	Pullorum	L3c	Asia	China	2018	Public database (Laboratory pre-uploaded)
SAL03417	Gallinarum	Pullorum	L3c	Asia	China	2018	Public database (Laboratory pre-uploaded)
SAL03418	Gallinarum	Pullorum	L3c	Asia	China	2018	Public database (Laboratory pre-uploaded)
SAL03416	Gallinarum	Pullorum	L3c	Asia	China	2018	Public database (Laboratory pre-uploaded)
SAL03422	Gallinarum	Pullorum	L3c	Asia	China	2013	Public database (Laboratory pre-uploaded)
SAL03423	Gallinarum	Pullorum	L3c	Asia	China	2018	Public database (Laboratory pre-uploaded)
SAL03421	Gallinarum	Pullorum	L3c	Asia	China	2018	Public database (Laboratory pre-uploaded)
SAL03408	Gallinarum	Pullorum	L3c	Asia	China	2018	Public database (Laboratory pre-uploaded)
SAL03415	Gallinarum	Pullorum	L3c	Asia	China	2018	Public database (Laboratory pre-uploaded)
SAL03420	Gallinarum	Pullorum	L3c	Asia	China	2018	Public database (Laboratory pre-uploaded)
SAL03419	Gallinarum	Pullorum	L3c	Asia	China	2018	Public database (Laboratory pre-uploaded)
SAL03297	Gallinarum	Pullorum	L3c	Asia	China	2015	Public database (Laboratory pre-uploaded)
SAL00725	Gallinarum	Pullorum	L3c	Asia	China	2015	Public database (Laboratory pre-uploaded)
SAL03302	Gallinarum	Pullorum	L3c	Asia	China	2015	Public database (Laboratory pre-uploaded)
SAL03301	Gallinarum	Pullorum	L3c	Asia	China	2015	Public database (Laboratory pre-uploaded)
SAL00744	Gallinarum	Pullorum	L3c	Asia	China	2017	Public database (Laboratory pre-uploaded)
R51	Gallinarum	Pullorum	L3c	Asia	China	2017	Public database (Laboratory pre-uploaded)
SAL03298	Gallinarum	Pullorum	L3c	Asia	China	2015	Public database (Laboratory pre-uploaded)
SAL03295	Gallinarum	Pullorum	L3c	Asia	China	2015	Public database (Laboratory pre-uploaded)
SAL03293	Gallinarum	Pullorum	L3c	Asia	China	2015	Public database (Laboratory pre-uploaded)
SAL03296	Gallinarum	Pullorum	L3c	Asia	China	2015	Public database (Laboratory pre-uploaded)
SAL03292	Gallinarum	Pullorum	L3c	Asia	China	2015	Public database (Laboratory pre-uploaded)
SAL03304	Gallinarum	Pullorum	L3c	Asia	China	2015	Public database (Laboratory pre-uploaded)
SAL03440	Gallinarum	Pullorum	L3c	Asia	China	2012	Public database (Laboratory pre-uploaded)
SAL03294	Gallinarum	Pullorum	L3c	Asia	China	2015	Public database (Laboratory pre-uploaded)
SAL00734	Gallinarum	Pullorum	L3c	Asia	China	2016	Public database (Laboratory pre-uploaded)
SAL04034	Gallinarum	Pullorum	L3c	Asia	China	2017	Public database (Laboratory pre-uploaded)
SAL03300	Gallinarum	Pullorum	L3c	Asia	China	2015	Public database (Laboratory pre-uploaded)
TH256	Gallinarum	Pullorum	L3c	Asia	China	2022	Public database (Laboratory pre-uploaded)
TH255	Gallinarum	Pullorum	L3c	Asia	China	2022	Public database (Laboratory pre-uploaded)
TH257	Gallinarum	Pullorum	L3c	Asia	China	2022	Public database (Laboratory pre-uploaded)
TH260	Gallinarum	Pullorum	L3c	Asia	China	2022	Public database (Laboratory pre-uploaded)
TH259	Gallinarum	Pullorum	L3c	Asia	China	2022	Public database (Laboratory pre-uploaded)
TH261	Gallinarum	Pullorum	L3c	Asia	China	2022	Public database (Laboratory pre-uploaded)
TH254	Gallinarum	Pullorum	L3c	Asia	China	2022	Public database (Laboratory pre-uploaded)
SAL03288	Gallinarum	Pullorum	L3c	Asia	China	2015	Public database (Laboratory pre-uploaded)
SAL03282	Gallinarum	Pullorum	L3c	Asia	China	2015	Public database (Laboratory pre-uploaded)
SAL03315	Gallinarum	Pullorum	L3c	Asia	China	2014	Public database (Laboratory pre-uploaded)
SAL03314	Gallinarum	Pullorum	L3c	Asia	China	2014	Public database (Laboratory pre-uploaded)
SAL00735	Gallinarum	Pullorum	L3c	Asia	China	2016	Public database (Laboratory pre-uploaded)
C15_FKDN220483769-1A_H25LVDSX5_L3	Gallinarum	Pullorum	L3c	Asia	China	2020	Public database (Laboratory pre-uploaded)
C13_FKDN220485113-1A_H25L7DSX5_L2	Gallinarum	Pullorum	L3c	Asia	China	2020	Public database (Laboratory pre-uploaded)
C49_FKDN220483803-1A_H25LVDSX5_L1	Gallinarum	Pullorum	L3c	Asia	China	NA	Public database (Laboratory pre-uploaded)
MY0189	Gallinarum	Pullorum	L3b	Asia	China	1954	Public database (Laboratory pre-uploaded)
SAL03447	Gallinarum	Pullorum	L3b	Asia	China	2013	Public database (Laboratory pre-uploaded)
SAL03388	Gallinarum	Pullorum	L3b	Asia	China	2011	Public database (Laboratory pre-uploaded)
SAL03386	Gallinarum	Pullorum	L3b	Asia	China	2008	Public database (Laboratory pre-uploaded)
SAL03392	Gallinarum	Pullorum	L3b	Asia	China	2013	Public database (Laboratory pre-uploaded)
SAL00742	Gallinarum	Pullorum	L3b	Asia	China	2017	Public database (Laboratory pre-uploaded)
TH184	Gallinarum	Pullorum	L3b	Asia	China	2022	Public database (Laboratory pre-uploaded)
SAL00736	Gallinarum	Pullorum	L3b	Asia	China	2017	Public database (Laboratory pre-uploaded)
SAL00747	Gallinarum	Pullorum	L3b	Asia	China	2017	Public database (Laboratory pre-uploaded)
SAL00741	Gallinarum	Pullorum	L3b	Asia	China	2017	Public database (Laboratory pre-uploaded)
SAL00740	Gallinarum	Pullorum	L3b	Asia	China	2017	Public database (Laboratory pre-uploaded)
SAL04027	Gallinarum	Pullorum	L3b	Asia	China	2017	Public database (Laboratory pre-uploaded)
SAL03320	Gallinarum	Pullorum	L3b	Asia	China	2014	Public database (Laboratory pre-uploaded)
SAL03319	Gallinarum	Pullorum	L3b	Asia	China	2014	Public database (Laboratory pre-uploaded)
SAL03337	Gallinarum	Pullorum	L3b	Asia	China	2015	Public database (Laboratory pre-uploaded)
SAL03335	Gallinarum	Pullorum	L3b	Asia	China	2015	Public database (Laboratory pre-uploaded)
SAL03305	Gallinarum	Pullorum	L3b	Asia	China	2015	Public database (Laboratory pre-uploaded)
SAL03318	Gallinarum	Pullorum	L3b	Asia	China	2014	Public database (Laboratory pre-uploaded)
SAL03317	Gallinarum	Pullorum	L3b	Asia	China	2014	Public database (Laboratory pre-uploaded)
SAL03313	Gallinarum	Pullorum	L3b	Asia	China	2014	Public database (Laboratory pre-uploaded)
SAL03443	Gallinarum	Pullorum	L3b	Asia	China	2013	Public database (Laboratory pre-uploaded)
SAL00724	Gallinarum	Pullorum	L3b	Asia	China	2015	Public database (Laboratory pre-uploaded)
SAL03442	Gallinarum	Pullorum	L3b	Asia	China	2013	Public database (Laboratory pre-uploaded)
SAL00707	Gallinarum	Pullorum	L3b	Asia	China	2014	Public database (Laboratory pre-uploaded)
SAL00705	Gallinarum	Pullorum	L3b	Asia	China	2014	Public database (Laboratory pre-uploaded)
SAL03444	Gallinarum	Pullorum	L3b	Asia	China	2013	Public database (Laboratory pre-uploaded)
SAL03445	Gallinarum	Pullorum	L3b	Asia	China	2013	Public database (Laboratory pre-uploaded)
SAL00710	Gallinarum	Pullorum	L3b	Asia	China	2014	Public database (Laboratory pre-uploaded)
SAL03390	Gallinarum	Pullorum	L3b	Asia	China	2012	Public database (Laboratory pre-uploaded)
SAL03396	Gallinarum	Pullorum	L3b	Asia	China	2014	Public database (Laboratory pre-uploaded)
SAL03446	Gallinarum	Pullorum	L3b	Asia	China	2013	Public database (Laboratory pre-uploaded)
MY0185	Gallinarum	Pullorum	L3b	Asia	China	2009	Public database (Laboratory pre-uploaded)
SAL03391	Gallinarum	Pullorum	L3b	Asia	China	2013	Public database (Laboratory pre-uploaded)
SAL00700	Gallinarum	Pullorum	L3b	Asia	China	2013	Public database (Laboratory pre-uploaded)
SAL04033	Gallinarum	Pullorum	L3b	Asia	China	2017	Public database (Laboratory pre-uploaded)
SAL03287	Gallinarum	Pullorum	L3b	Asia	China	2015	Public database (Laboratory pre-uploaded)
SAL03285	Gallinarum	Pullorum	L3b	Asia	China	2015	Public database (Laboratory pre-uploaded)
SAL03324	Gallinarum	Pullorum	L3b	Asia	China	2014	Public database (Laboratory pre-uploaded)
SAL03322	Gallinarum	Pullorum	L3b	Asia	China	2014	Public database (Laboratory pre-uploaded)
SAL03321	Gallinarum	Pullorum	L3b	Asia	China	2014	Public database (Laboratory pre-uploaded)
SAL03323	Gallinarum	Pullorum	L3b	Asia	China	2014	Public database (Laboratory pre-uploaded)
SAL02697	Gallinarum	Pullorum	L3b	Asia	China	2018	Public database (Laboratory pre-uploaded)
SAL02695	Gallinarum	Pullorum	L3b	Asia	China	2018	Public database (Laboratory pre-uploaded)
SAL02694	Gallinarum	Pullorum	L3b	Asia	China	2018	Public database (Laboratory pre-uploaded)
SAL04037	Gallinarum	Pullorum	L3b	Asia	China	2017	Public database (Laboratory pre-uploaded)
SAL03333	Gallinarum	Pullorum	L3b	Asia	China	2014	Public database (Laboratory pre-uploaded)
SAL03332	Gallinarum	Pullorum	L3b	Asia	China	2014	Public database (Laboratory pre-uploaded)
SAL03331	Gallinarum	Pullorum	L3b	Asia	China	2014	Public database (Laboratory pre-uploaded)
SAL00745	Gallinarum	Pullorum	L3b	Asia	China	2017	Public database (Laboratory pre-uploaded)
SAL00711	Gallinarum	Pullorum	L3b	Asia	China	2014	Public database (Laboratory pre-uploaded)
SAL00713	Gallinarum	Pullorum	L3b	Asia	China	2014	Public database (Laboratory pre-uploaded)
SAL00712	Gallinarum	Pullorum	L3b	Asia	China	2014	Public database (Laboratory pre-uploaded)
SAL04024	Gallinarum	Pullorum	L3b	Asia	China	2017	Public database (Laboratory pre-uploaded)
SAL04022	Gallinarum	Pullorum	L3b	Asia	China	2017	Public database (Laboratory pre-uploaded)
SAL04023	Gallinarum	Pullorum	L3b	Asia	China	2017	Public database (Laboratory pre-uploaded)
SAL04021	Gallinarum	Pullorum	L3b	Asia	China	2017	Public database (Laboratory pre-uploaded)
SAL03311	Gallinarum	Pullorum	L3b	Asia	China	2015	Public database (Laboratory pre-uploaded)
SAL03310	Gallinarum	Pullorum	L3b	Asia	China	2015	Public database (Laboratory pre-uploaded)
SAL03441	Gallinarum	Pullorum	L3b	Asia	China	2013	Public database (Laboratory pre-uploaded)
SAL00714	Gallinarum	Pullorum	L3b	Asia	China	2014	Public database (Laboratory pre-uploaded)
SAL02680	Gallinarum	Pullorum	L3b	Asia	China	2013	Public database (Laboratory pre-uploaded)
SAL02679	Gallinarum	Pullorum	L3b	Asia	China	2013	Public database (Laboratory pre-uploaded)
SAL02703	Gallinarum	Pullorum	L3b	Asia	China	2018	Public database (Laboratory pre-uploaded)
SAL02696	Gallinarum	Pullorum	L3b	Asia	China	2018	Public database (Laboratory pre-uploaded)
SAL03404	Gallinarum	Pullorum	L3b	Asia	China	2012	Public database (Laboratory pre-uploaded)
SAL03316	Gallinarum	Pullorum	L3b	Asia	China	2014	Public database (Laboratory pre-uploaded)
SAL04036	Gallinarum	Pullorum	L3b	Asia	China	2017	Public database (Laboratory pre-uploaded)
SAL03312	Gallinarum	Pullorum	L3b	Asia	China	2014	Public database (Laboratory pre-uploaded)
SAL03289	Gallinarum	Pullorum	L3b	Asia	China	2015	Public database (Laboratory pre-uploaded)
SAL04030	Gallinarum	Pullorum	L3b	Asia	China	2017	Public database (Laboratory pre-uploaded)
SAL03334	Gallinarum	Pullorum	L3b	Asia	China	2015	Public database (Laboratory pre-uploaded)
SAL03385	Gallinarum	Pullorum	L3b	Asia	China	1978	Public database (Laboratory pre-uploaded)
