# Supplementary material for: Avian-specific Salmonella transition to endemicity is accompanied by localized resistome and mobilome interaction
Source: eLife. 2025 Mar 4;13:RP101241. doi: 10.7554/eLife.101241 (PMC11879110; doi:10.7554/eLife.101241)
Supplement: Supplementary file 3. [file elife-101241-supp3.xlsx]

## Sheet: Sheet1
Strain	Biovar	Lineage	Continent	Country	Province	Region
SAL03326	bvSP	L3c	Asia	China	Henan	Northern China
SAL00724	bvSP	L3b	Asia	China	Jiangsu	Eastern China
SAL03290	bvSP	L2b	Asia	China	Henan	Northern China
SAL00700	bvSP	L3b	Asia	China	Jiangsu	Eastern China
SAL04093	bvSP	L3c	Asia	China	Xinjiang	Northern China
SAL_PA7718AA	bvSP	L3b	Asia	China	Henan	Northern China
SAL04092	bvSP	L3c	Asia	China	Xinjiang	Northern China
SAL_PA7725AA	bvSP	L3b	Asia	China	Shaanxi	Northern China
SAL04024	bvSP	L3b	Asia	China	Liaoning	Northern China
SAL03440	bvSP	L3c	Asia	China	Anhui	Eastern China
SAL00722	bvSP	L2b	Asia	China	Jiangsu	Eastern China
SAL03334	bvSP	L3b	Asia	China	Henan	Northern China
M36	bvSP	L2b	Asia	China	Zhejiang	Eastern China
X17	bvSP	L2b	Asia	China	Zhejiang	Eastern China
SAL03330	bvSP	L3c	Asia	China	Henan	Northern China
SAL_PA7702AA	bvSP	L3b	Asia	China	Jiangsu	Eastern China
TH254	bvSP	L3c	Asia	China	Jiangxi	Eastern China
SAL03328	bvSP	L3c	Asia	China	Henan	Northern China
M244	bvSP	L2b	Asia	China	Zhejiang	Eastern China
SAL03428	bvSP	L3c	Asia	China	Jiangsu	Eastern China
SAL03422	bvSP	L3c	Asia	China	Guangxi	Southern China
GCA_000462995.1	bvSP	L2a	Asia	China	Heilongjiang	Northern China
SAL00730	bvSP	L2b	Asia	China	Anhui	Eastern China
SAL_PA7755AA	bvSP	L3b	Asia	China	Jiangsu	Eastern China
SAL02669	bvSP	L2b	Asia	China	Shanghai	Eastern China
SAL_PA7740AA	bvSP	L1	Asia	China	Jiangsu	Eastern China
SAL04035	bvSP	L3c	Asia	China	Heilongjiang	Northern China
SAL_PA6310AA	bvSP	L3b	Asia	China	Jiangsu	Eastern China
M183	bvSP	L2b	Asia	China	Zhejiang	Eastern China
SAL_PA7689AA	bvSP	L3b	Asia	China	Jiangsu	Eastern China
X129	bvSP	L2b	Asia	China	Zhejiang	Eastern China
7310_combined	bvSP	L1	Asia	China	Jiangsu	Eastern China
ERS2630752	bvSP	L3b	Asia	China	Jiangsu	Eastern China
SAL03423	bvSP	L3c	Asia	China	Guangxi	Southern China
SAL02657	bvSP	L3c	Asia	China	Shandong	Northern China
SAL_PA7759AA	bvSP	L3c	Asia	China	Henan	Northern China
SAL03421	bvSP	L3c	Asia	China	Guangxi	Southern China
SAL04025	bvSP	L2b	Asia	China	Heilongjiang	Northern China
SAL00712	bvSP	L3b	Asia	China	Jiangsu	Eastern China
M262	bvSP	L2b	Asia	China	Zhejiang	Eastern China
SAL03309	bvSP	L3c	Asia	China	Henan	Northern China
SAL_PA7727AA	bvSP	L3b	Asia	China	Jiangsu	Eastern China
X186-2	bvSP	L2b	Asia	China	Zhejiang	Eastern China
SAL02702	bvSP	L3c	Asia	China	Guangxi	Southern China
SAL03436	bvSP	L2b	Asia	China	Anhui	Eastern China
SAL03287	bvSP	L3b	Asia	China	Henan	Northern China
SAL03305	bvSP	L3b	Asia	China	Henan	Northern China
X206	bvSP	L2b	Asia	China	Zhejiang	Eastern China
E393-2	bvSP	L3b	Asia	China	Zhejiang	Eastern China
X159	bvSP	L2b	Asia	China	Zhejiang	Eastern China
SAL03321	bvSP	L3b	Asia	China	Henan	Northern China
SAL04094	bvSP	L2b	Asia	China	Xinjiang	Northern China
SAL_PA7971AA	bvSP	L3b	Asia	China	Jiangsu	Eastern China
XXB1725	bvSP	L2b	Asia	China	Hebei	Northern China
M34	bvSP	L2b	Asia	China	Zhejiang	Eastern China
SAL02668	bvSP	L2b	Asia	China	Shanghai	Eastern China
SAL00729	bvSP	L2b	Asia	China	Anhui	Eastern China
SAL03453	bvSP	L3c	Asia	China	Hubei	Southern China
SAL03302	bvSP	L3c	Asia	China	Henan	Northern China
SAL03318	bvSP	L3b	Asia	China	Henan	Northern China
SAL03324	bvSP	L3b	Asia	China	Henan	Northern China
M9-2	bvSP	L2b	Asia	China	Zhejiang	Eastern China
SAL04098	bvSP	L3c	Asia	China	Sichuan	Southern China
MY0186	bvSP	L1	Asia	China	Jiangsu	Eastern China
M284	bvSP	L2b	Asia	China	Zhejiang	Eastern China
SAL_PA7757AA	bvSP	L3b	Asia	China	Henan	Northern China
SAL03331	bvSP	L3b	Asia	China	Henan	Northern China
SAL04027	bvSP	L3b	Asia	China	Heilongjiang	Northern China
SAL00715	bvSP	L2b	Asia	China	Jiangsu	Eastern China
SAL00708	bvSP	L3c	Asia	China	Jiangsu	Eastern China
SAL03323	bvSP	L3b	Asia	China	Henan	Northern China
SAL03297	bvSP	L3c	Asia	China	Henan	Northern China
X124	bvSP	L2b	Asia	China	Zhejiang	Eastern China
SAL00741	bvSP	L3b	Asia	China	Jiangsu	Eastern China
M175	bvSP	L2b	Asia	China	Zhejiang	Eastern China
SAL02676	bvSP	L3c	Asia	China	Guangdong	Southern China
SAL03397	bvSP	L3c	Asia	China	Gansu	Northern China
7904_combined	bvSP	L1	Asia	China	Jiangsu	Eastern China
SAL03438	bvSP	L3c	Asia	China	Hubei	Southern China
SAL03298	bvSP	L3c	Asia	China	Henan	Northern China
SAL02699	bvSP	L3c	Asia	China	Guangxi	Southern China
SAL_PA7698AA	bvSP	L3c	Asia	China	Jiangsu	Eastern China
SAL04102	bvSP	L3c	Asia	China	Sichuan	Southern China
X166	bvSP	L2b	Asia	China	Zhejiang	Eastern China
M220	bvSP	L2b	Asia	China	Zhejiang	Eastern China
SAL04100	bvSP	L3c	Asia	China	Sichuan	Southern China
SAL04037	bvSP	L3b	Asia	China	Heilongjiang	Northern China
X38	bvSP	L2b	Asia	China	Zhejiang	Eastern China
SAL02679	bvSP	L3b	Asia	China	Guangdong	Southern China
SAL03506	bvSP	L2b	Asia	China	Shanxi	Northern China
SAL_PA7704AA	bvSP	L2b	Asia	China	Jiangsu	Eastern China
SAL02664	bvSP	L3c	Asia	China	Shandong	Northern China
TH256	bvSP	L3c	Asia	China	Jiangxi	Eastern China
M292	bvSP	L2b	Asia	China	Zhejiang	Eastern China
SAL02681	bvSP	L3c	Asia	China	Guangdong	Southern China
SAL04017	bvSP	L3c	Asia	China	Heilongjiang	Northern China
SAL_PA7730AA	bvSP	L3c	Asia	China	Anhui	Eastern China
M277	bvSP	L2b	Asia	China	Zhejiang	Eastern China
SAL03386	bvSP	L3b	Asia	China	Jiangsu	Eastern China
SAL_PA7756AA	bvSP	L2b	Asia	China	Jiangsu	Eastern China
ERS2630720	bvSP	L3b	Asia	China	Jiangsu	Eastern China
SAL03435	bvSP	L3c	Asia	China	Shandong	Northern China
SAL04026	bvSP	L2b	Asia	China	Heilongjiang	Northern China
M127	bvSP	L2b	Asia	China	Zhejiang	Eastern China
M285	bvSP	L2b	Asia	China	Zhejiang	Eastern China
SAL03296	bvSP	L3c	Asia	China	Henan	Northern China
SAL03408	bvSP	L3c	Asia	China	Guangxi	Southern China
SAL_PA7758AA	bvSP	L3b	Asia	China	Jiangsu	Eastern China
MY0189	bvSP	L3b	Asia	China	Beijing	Northern China
SAL04030	bvSP	L3b	Asia	China	Heilongjiang	Northern China
SAL02694	bvSP	L3b	Asia	China	Guangxi	Southern China
SAL00747	bvSP	L3b	Asia	China	Jiangsu	Eastern China
X2	bvSP	L2b	Asia	China	Zhejiang	Eastern China
SAL03395	bvSP	L1	Asia	China	Guangxi	Southern China
SAL_PA7711AA	bvSP	L3b	Asia	China	Jiangsu	Eastern China
SAL00745	bvSP	L3b	Asia	China	Jiangsu	Eastern China
SAL_PA7724AA	bvSP	L3b	Asia	China	Jiangsu	Eastern China
SAL00717	bvSP	L3c	Asia	China	Jiangsu	Eastern China
SAL_PA7708AA	bvSP	L3b	Asia	China	Beijing	Northern China
SAL00734	bvSP	L3c	Asia	China	Jiangsu	Eastern China
ERS2630765	bvSP	L3b	Asia	China	Jiangsu	Eastern China
M198	bvSP	L2b	Asia	China	Zhejiang	Eastern China
ERS2630722	bvSP	L3b	Asia	China	Jiangsu	Eastern China
SAL02654	bvSP	L3c	Asia	China	Shandong	Northern China
E404	bvSP	L2b	Asia	China	Zhejiang	Eastern China
M312	bvSP	L2b	Asia	China	Zhejiang	Eastern China
SAL03415	bvSP	L3c	Asia	China	Guangxi	Southern China
SAL02674	bvSP	L3c	Asia	China	Guangdong	Southern China
ERS2630790	bvSP	L1	Asia	China	Jiangsu	Eastern China
SAL04091	bvSP	L2b	Asia	China	Xinjiang	Northern China
SAL_PA7983AA	bvSP	L3b	Asia	China	Jiangsu	Eastern China
SAL03308	bvSP	L2b	Asia	China	Henan	Northern China
X6	bvSP	L2b	Asia	China	Zhejiang	Eastern China
M9-4	bvSP	L2b	Asia	China	Zhejiang	Eastern China
SAL03394	bvSP	L1	Asia	China	Guangxi	Southern China
SAL_PA7705AA	bvSP	L3b	Asia	China	Jiangsu	Eastern China
SAL02695	bvSP	L3b	Asia	China	Guangxi	Southern China
SAL04101	bvSP	L3c	Asia	China	Sichuan	Southern China
ERS2630744	bvSP	L3b	Asia	China	Jiangsu	Eastern China
SAL02661	bvSP	L3c	Asia	China	Shandong	Northern China
M241	bvSP	L2b	Asia	China	Zhejiang	Eastern China
ERS2630738	bvSP	L3b	Asia	China	Jiangsu	Eastern China
SAL04018	bvSP	L3c	Asia	China	Heilongjiang	Northern China
SAL_PA7703AA	bvSP	L3b	Asia	China	Anhui	Eastern China
SAL03285	bvSP	L3b	Asia	China	Henan	Northern China
X89	bvSP	L2b	Asia	China	Zhejiang	Eastern China
SAL02700	bvSP	L3c	Asia	China	Guangxi	Southern China
SAL_PA7737AA	bvSP	L3b	Asia	China	Anhui	Eastern China
SAL03419	bvSP	L3c	Asia	China	Guangxi	Southern China
SAL_PA7975AA	bvSP	L3b	Asia	China	NA	Not collect
SAL00714	bvSP	L3b	Asia	China	Jiangsu	Eastern China
SAL03392	bvSP	L3b	Asia	China	Guangxi	Southern China
X216	bvSP	L2b	Asia	China	Zhejiang	Eastern China
M205	bvSP	L2b	Asia	China	Zhejiang	Eastern China
SAL03413	bvSP	L3c	Asia	China	Guangxi	Southern China
SAL02675	bvSP	L3c	Asia	China	Guangdong	Southern China
X5	bvSP	L2b	Asia	China	Zhejiang	Eastern China
SAL03335	bvSP	L3b	Asia	China	Henan	Northern China
SAL03448	bvSP	L3c	Asia	China	Henan	Northern China
SAL03439	bvSP	L2b	Asia	China	Anhui	Eastern China
SAL00742	bvSP	L3b	Asia	China	Jiangsu	Eastern China
SAL03403	bvSP	L3c	Asia	China	Gansu	Northern China
SAL00746	bvSP	L3c	Asia	China	Jiangsu	Eastern China
SAL03313	bvSP	L3b	Asia	China	Henan	Northern China
X90	bvSP	L2b	Asia	China	Zhejiang	Eastern China
X113	bvSP	L2b	Asia	China	Zhejiang	Eastern China
X130	bvSP	L2b	Asia	China	Zhejiang	Eastern China
SAL02649	bvSP	L2b	Asia	China	Guangxi	Southern China
SAL_PA7974AA	bvSP	L3b	Asia	China	Jiangsu	Eastern China
SAL03446	bvSP	L3b	Asia	China	Hubei	Southern China
SAL04020	bvSP	L3c	Asia	China	Heilongjiang	Northern China
SAL04023	bvSP	L3b	Asia	China	Liaoning	Northern China
SAL03593	bvSP	L3c	Asia	China	Guangxi	Southern China
X177-2	bvSP	L2b	Asia	China	Zhejiang	Eastern China
SAL_PA7754AA	bvSP	L3b	Asia	China	Beijing	Northern China
ERS2630732	bvSP	L3b	Asia	China	Jiangsu	Eastern China
SAL_PA7734AA	bvSP	L3b	Asia	China	Shaanxi	Northern China
SAL02651	bvSP	L3c	Asia	China	Shandong	Northern China
SAL00713	bvSP	L3b	Asia	China	Jiangsu	Eastern China
SAL03294	bvSP	L3c	Asia	China	Henan	Northern China
SAL03307	bvSP	L2b	Asia	China	Henan	Northern China
SAL_PA7722AA	bvSP	L3b	Asia	China	Xinjiang	Northern China
X187	bvSP	L2b	Asia	China	Zhejiang	Eastern China
SAL03289	bvSP	L3b	Asia	China	Henan	Northern China
SAL03426	bvSP	L3c	Asia	China	Jiangsu	Eastern China
M162	bvSP	L2b	Asia	China	Zhejiang	Eastern China
ERS2630728	bvSP	L3b	Asia	China	Beijing	Northern China
SAL_PA7716AA	bvSP	L3b	Asia	China	Jiangsu	Eastern China
SAL02652	bvSP	L3c	Asia	China	Shandong	Northern China
SAL_PA7692AA	bvSP	L2b	Asia	China	Jiangsu	Eastern China
SAL03295	bvSP	L3c	Asia	China	Henan	Northern China
SAL03433	bvSP	L3c	Asia	China	Jiangsu	Eastern China
SAL_PA7695AA	bvSP	L3b	Asia	China	Shaanxi	Northern China
XXB1089	bvSP	L2b	Asia	China	Shanghai	Eastern China
SAL00736	bvSP	L3b	Asia	China	Jiangsu	Eastern China
SAL03432	bvSP	L3c	Asia	China	Jiangsu	Eastern China
TH260	bvSP	L3c	Asia	China	Jiangxi	Eastern China
SAL02650	bvSP	L2b	Asia	China	Guangxi	Southern China
SAL03391	bvSP	L3b	Asia	China	Beijing	Northern China
C15_FKDN220483769-1A_H25LVDSX5_L3	bvSP	L3c	Asia	China	Guangxi	Southern China
SAL00718	bvSP	L3c	Asia	China	Jiangsu	Eastern China
SAL04099	bvSP	L3c	Asia	China	Sichuan	Southern China
SAL_GB9917AA	bvSP	L3c	Asia	China	Yunnan	Southern China
SAL02662	bvSP	L3c	Asia	China	Shandong	Northern China
SAL03429	bvSP	L3c	Asia	China	Jiangsu	Eastern China
MY0185	bvSP	L3b	Asia	China	Jiangsu	Eastern China
SAL03314	bvSP	L3c	Asia	China	Henan	Northern China
ERS2630718	bvSP	L3b	Asia	China	Jiangsu	Eastern China
SAL_PA7696AA	bvSP	L3c	Asia	China	Jiangsu	Eastern China
SAL03388	bvSP	L3b	Asia	China	Jiangsu	Eastern China
ERS2630811	bvSP	L3c	Asia	China	Henan	Northern China
SAL_PA7693AA	bvSP	L3b	Asia	China	Anhui	Eastern China
SAL03407	bvSP	L3c	Asia	China	Guangxi	Southern China
M47	bvSP	L2b	Asia	China	Zhejiang	Eastern China
SAL03431	bvSP	L3c	Asia	China	Anhui	Eastern China
SAL_PA7736AA	bvSP	L3b	Asia	China	Jiangsu	Eastern China
SAL03329	bvSP	L3c	Asia	China	Henan	Northern China
SAL02667	bvSP	L2b	Asia	China	Shanghai	Eastern China
SAL03325	bvSP	L3c	Asia	China	Henan	Northern China
SAL_PA7701AA	bvSP	L3c	Asia	China	Anhui	Eastern China
SAL02663	bvSP	L3c	Asia	China	Shandong	Northern China
SAL00732	bvSP	L2b	Asia	China	Jiangsu	Eastern China
X170	bvSP	L2b	Asia	China	Zhejiang	Eastern China
SAL03319	bvSP	L3b	Asia	China	Henan	Northern China
M123	bvSP	L2b	Asia	China	Zhejiang	Eastern China
SAL03507	bvSP	L2b	Asia	China	Shandong	Northern China
ERS2630729	bvSP	L3b	Asia	China	Beijing	Northern China
SAL02672	bvSP	L2b	Asia	China	Shanghai	Eastern China
X97	bvSP	L2b	Asia	China	Zhejiang	Eastern China
X13	bvSP	L2b	Asia	China	Zhejiang	Eastern China
SAL_PA7745AA	bvSP	L3c	Asia	China	Anhui	Eastern China
SAL02671	bvSP	L2b	Asia	China	Shanghai	Eastern China
7808_combined	bvSP	L1	Asia	China	Jiangsu	Eastern China
SAL02648	bvSP	L2b	Asia	China	Guangxi	Southern China
SAL03417	bvSP	L3c	Asia	China	Guangxi	Southern China
SAL00710	bvSP	L3b	Asia	China	Jiangsu	Eastern China
X169	bvSP	L2b	Asia	China	Zhejiang	Eastern China
SAL03404	bvSP	L3b	Asia	China	Heilongjiang	Northern China
X215	bvSP	L2b	Asia	China	Zhejiang	Eastern China
SAL03317	bvSP	L3b	Asia	China	Henan	Northern China
SAL04029	bvSP	L2b	Asia	China	Heilongjiang	Northern China
SAL03416	bvSP	L3c	Asia	China	Guangxi	Southern China
E388-2	bvSP	L3b	Asia	China	Zhejiang	Eastern China
SAL03615	bvSP	L3c	Asia	China	Guangdong	Southern China
SAL04036	bvSP	L3b	Asia	China	Heilongjiang	Northern China
E392-2	bvSP	L3b	Asia	China	Zhejiang	Eastern China
M207	bvSP	L2b	Asia	China	Zhejiang	Eastern China
SAL03434	bvSP	L3c	Asia	China	Shandong	Northern China
TH261	bvSP	L3c	Asia	China	Jiangxi	Eastern China
SAL03333	bvSP	L3b	Asia	China	Henan	Northern China
SAL04097	bvSP	L3c	Asia	China	Sichuan	Southern China
SAL04028	bvSP	L2b	Asia	China	Heilongjiang	Northern China
X10	bvSP	L2b	Asia	China	Zhejiang	Eastern China
X177	bvSP	L2b	Asia	China	Zhejiang	Eastern China
SAL03282	bvSP	L3c	Asia	China	Henan	Northern China
SAL03292	bvSP	L3c	Asia	China	Henan	Northern China
SAL02703	bvSP	L3b	Asia	China	Guangxi	Southern China
SAL_PA7976AA	bvSP	L3b	Asia	China	Sichuan	Southern China
SAL03442	bvSP	L3b	Asia	China	Henan	Northern China
SAL04031	bvSP	L3c	Asia	China	Heilongjiang	Northern China
X186	bvSP	L2b	Asia	China	Zhejiang	Eastern China
SAL_PA7686AA	bvSP	L3c	Asia	China	Jiangsu	Eastern China
X176	bvSP	L2b	Asia	China	Zhejiang	Eastern China
M281	bvSP	L2b	Asia	China	Zhejiang	Eastern China
SAL04021	bvSP	L3b	Asia	China	Liaoning	Northern China
E388-1	bvSP	L3b	Asia	China	Zhejiang	Eastern China
SAL00739	bvSP	L3c	Asia	China	Jiangsu	Eastern China
SAL_PA7699AA	bvSP	L1	Asia	China	Henan	Northern China
SAL03430	bvSP	L3c	Asia	China	Jiangsu	Eastern China
SAL02680	bvSP	L3b	Asia	China	Guangdong	Southern China
SAL02670	bvSP	L2b	Asia	China	Shanghai	Eastern China
SAL00711	bvSP	L3b	Asia	China	Jiangsu	Eastern China
SAL03443	bvSP	L3b	Asia	China	Henan	Northern China
SAL02696	bvSP	L3b	Asia	China	Guangxi	Southern China
SAL03449	bvSP	L3c	Asia	China	Henan	Northern China
SAL03411	bvSP	L3c	Asia	China	Guangxi	Southern China
SAL02665	bvSP	L3c	Asia	China	Shandong	Northern China
M9-1	bvSP	L2b	Asia	China	Zhejiang	Eastern China
SAL02673	bvSP	L2b	Asia	China	Shanghai	Eastern China
SAL04090	bvSP	L2b	Asia	China	Xinjiang	Northern China
SAL_PA7747AA	bvSP	L3b	Asia	China	Jiangsu	Eastern China
SAL04095	bvSP	L2b	Asia	China	Xinjiang	Northern China
SAL04033	bvSP	L3b	Asia	China	Heilongjiang	Northern China
SAL03414	bvSP	L3c	Asia	China	Guangxi	Southern China
SAL03437	bvSP	L2b	Asia	China	Anhui	Eastern China
SAL_PA7719AA	bvSP	L3c	Asia	China	Jiangsu	Eastern China
SAL_PA7741AA	bvSP	L3b	Asia	China	Jiangsu	Eastern China
SAL02697	bvSP	L3b	Asia	China	Guangxi	Southern China
ERS2630739	bvSP	L3b	Asia	China	Jiangsu	Eastern China
SAL03301	bvSP	L3c	Asia	China	Henan	Northern China
X79	bvSP	L2b	Asia	China	Zhejiang	Eastern China
SAL03304	bvSP	L3c	Asia	China	Henan	Northern China
SAL03396	bvSP	L3b	Asia	China	Gansu	Northern China
SAL03497	bvSP	L2b	Asia	China	Shandong	Northern China
SAL00744	bvSP	L3c	Asia	China	Anhui	Eastern China
SAL02677	bvSP	L3c	Asia	China	Guangdong	Southern China
SAL03316	bvSP	L3b	Asia	China	Henan	Northern China
C49_FKDN220483803-1A_H25LVDSX5_L1	bvSP	L3c	Asia	China	Guangxi	Southern China
M307	bvSP	L2b	Asia	China	Zhejiang	Eastern China
SAL00735	bvSP	L3c	Asia	China	Jiangsu	Eastern China
SRR26662937	bvSP	L3c	Asia	China	Shandong	Northern China
SRR26663521	bvSP	L2b	Asia	China	Shandong	Northern China
X153	bvSP	L2b	Asia	China	Zhejiang	Eastern China
SAL_PA7700AA	bvSP	L3b	Asia	China	Jiangsu	Eastern China
X67	bvSP	L2b	Asia	China	Zhejiang	Eastern China
SAL03337	bvSP	L3b	Asia	China	Henan	Northern China
M113	bvSP	L2b	Asia	China	Zhejiang	Eastern China
X134	bvSP	L2b	Asia	China	Zhejiang	Eastern China
SAL03293	bvSP	L3c	Asia	China	Henan	Northern China
SAL03320	bvSP	L3b	Asia	China	Henan	Northern China
SAL03286	bvSP	L2b	Asia	China	Henan	Northern China
SAL_KA3505AA	bvSP	L2b	Asia	China	Jiangsu	Eastern China
SAL03418	bvSP	L3c	Asia	China	Guangxi	Southern China
SAL03312	bvSP	L3b	Asia	China	Henan	Northern China
TH184	bvSP	L3b	Asia	China	Jiangxi	Eastern China
SAL03452	bvSP	L3c	Asia	China	Hubei	Southern China
SAL_PA7746AA	bvSP	L3b	Asia	China	Jiangsu	Eastern China
SAL00726	bvSP	L2b	Asia	China	Jiangsu	Eastern China
SAL03303	bvSP	L2b	Asia	China	Henan	Northern China
SAL03409	bvSP	L3c	Asia	China	Guangxi	Southern China
X19	bvSP	L2b	Asia	China	Zhejiang	Eastern China
SAL02698	bvSP	L3c	Asia	China	Guangxi	Southern China
SAL00725	bvSP	L3c	Asia	China	Jiangsu	Eastern China
SAL02656	bvSP	L3c	Asia	China	Shandong	Northern China
C13_FKDN220485113-1A_H25L7DSX5_L2	bvSP	L3c	Asia	China	Guangxi	Southern China
X82	bvSP	L2b	Asia	China	Zhejiang	Eastern China
M275	bvSP	L2b	Asia	China	Zhejiang	Eastern China
SAL03300	bvSP	L3c	Asia	China	Henan	Northern China
SAL00705	bvSP	L3b	Asia	China	Jiangsu	Eastern China
X105	bvSP	L2b	Asia	China	Zhejiang	Eastern China
SAL00738	bvSP	L3c	Asia	China	Jiangsu	Eastern China
SAL_PA7710AA	bvSP	L2b	Asia	China	Jiangsu	Eastern China
X98	bvSP	L2b	Asia	China	Zhejiang	Eastern China
ERS2630724	bvSP	L3b	Asia	China	Jiangsu	Eastern China
SAL03385	bvSP	L3b	Asia	China	Jiangsu	Eastern China
SAL_UA3243AA	bvSP	L3c	Asia	China	Henan	Northern China
SAL03444	bvSP	L3b	Asia	China	Hubei	Southern China
X230	bvSP	L2b	Asia	China	Zhejiang	Eastern China
SAL_PA7713AA	bvSP	L3b	Asia	China	Jiangsu	Eastern China
SAL00743	bvSP	L3c	Asia	China	Jiangsu	Eastern China
SAL03402	bvSP	L2b	Asia	China	Gansu	Northern China
SAL03315	bvSP	L3c	Asia	China	Henan	Northern China
SAL_PA7707AA	bvSP	L3b	Asia	China	Jiangsu	Eastern China
SAL00707	bvSP	L3b	Asia	China	Jiangsu	Eastern China
M303	bvSP	L2b	Asia	China	Zhejiang	Eastern China
SAL03327	bvSP	L3c	Asia	China	Henan	Northern China
SAL02658	bvSP	L3c	Asia	China	Shandong	Northern China
R51	bvSP	L3c	Asia	China	Anhui	Eastern China
X165	bvSP	L2b	Asia	China	Zhejiang	Eastern China
SAL02653	bvSP	L3c	Asia	China	Shandong	Northern China
SAL_PA7750AA	bvSP	L3b	Asia	China	Henan	Northern China
X26	bvSP	L2b	Asia	China	Zhejiang	Eastern China
SAL04034	bvSP	L3c	Asia	China	Heilongjiang	Northern China
SAL_PA7970AA	bvSP	L3b	Asia	China	Jiangsu	Eastern China
SAL03445	bvSP	L3b	Asia	China	Hubei	Southern China
M29	bvSP	L2b	Asia	China	Zhejiang	Eastern China
E392-1	bvSP	L3b	Asia	China	Zhejiang	Eastern China
SAL_PA7977AA	bvSP	L3b	Asia	China	Jiangsu	Eastern China
M90-1	bvSP	L2b	Asia	China	Zhejiang	Eastern China
X84	bvSP	L2b	Asia	China	Zhejiang	Eastern China
SAL04096	bvSP	L3c	Asia	China	Sichuan	Southern China
SAL_PA7749AA	bvSP	L3b	Asia	China	Jiangsu	Eastern China
SAL00728	bvSP	L2b	Asia	China	Jiangsu	Eastern China
SAL02666	bvSP	L2b	Asia	China	Shanghai	Eastern China
SAL_PA7753AA	bvSP	L3b	Asia	China	Jiangsu	Eastern China
X65	bvSP	L2b	Asia	China	Zhejiang	Eastern China
SAL03401	bvSP	L3c	Asia	China	Gansu	Northern China
SAL00740	bvSP	L3b	Asia	China	Jiangsu	Eastern China
SAL02659	bvSP	L3c	Asia	China	Shandong	Northern China
SAL03390	bvSP	L3b	Asia	China	Jiangsu	Eastern China
X140	bvSP	L2b	Asia	China	Zhejiang	Eastern China
SAL03288	bvSP	L3c	Asia	China	Henan	Northern China
SAL03420	bvSP	L3c	Asia	China	Guangxi	Southern China
SAL_PA7729AA	bvSP	L3c	Asia	China	Shandong	Northern China
SAL03496	bvSP	L2b	Asia	China	Shanxi	Northern China
SAL00731	bvSP	L2b	Asia	China	Jiangsu	Eastern China
SAL03291	bvSP	L2b	Asia	China	Henan	Northern China
X207	bvSP	L2b	Asia	China	Zhejiang	Eastern China
M227	bvSP	L2b	Asia	China	Zhejiang	Eastern China
E393-1	bvSP	L3b	Asia	China	Zhejiang	Eastern China
SAL02660	bvSP	L3c	Asia	China	Shandong	Northern China
SAL04019	bvSP	L3c	Asia	China	Heilongjiang	Northern China
SAL_PA7742AA	bvSP	L2b	Asia	China	Jiangsu	Eastern China
M9-3	bvSP	L2b	Asia	China	Zhejiang	Eastern China
SAL_PA7717AA	bvSP	L2b	Asia	China	Jiangsu	Eastern China
TH255	bvSP	L3c	Asia	China	Jiangxi	Eastern China
SAL00737	bvSP	L3c	Asia	China	Jiangsu	Eastern China
M206	bvSP	L2b	Asia	China	Zhejiang	Eastern China
SAL_PA7723AA	bvSP	L3c	Asia	China	Shandong	Northern China
M132	bvSP	L2b	Asia	China	Zhejiang	Eastern China
SAL04032	bvSP	L3c	Asia	China	Heilongjiang	Northern China
SAL02647	bvSP	L2b	Asia	China	Hubei	Southern China
X237	bvSP	L2b	Asia	China	Zhejiang	Eastern China
X145	bvSP	L2b	Asia	China	Zhejiang	Eastern China
SAL03322	bvSP	L3b	Asia	China	Henan	Northern China
SAL_PA0702AA	bvSP	L3b	Asia	China	Jiangsu	Eastern China
SAL_PA7752AA	bvSP	L3b	Asia	China	Henan	Northern China
SAL_PA7706AA	bvSP	L3b	Asia	China	Jiangsu	Eastern China
M313	bvSP	L2b	Asia	China	Zhejiang	Eastern China
M163	bvSP	L2b	Asia	China	Zhejiang	Eastern China
X80	bvSP	L2b	Asia	China	Zhejiang	Eastern China
SAL03441	bvSP	L3b	Asia	China	Henan	Northern China
SAL03447	bvSP	L3b	Asia	China	Hubei	Southern China
X49	bvSP	L2b	Asia	China	Zhejiang	Eastern China
SAL03306	bvSP	L2b	Asia	China	Henan	Northern China
SAL04022	bvSP	L3b	Asia	China	Liaoning	Northern China
SAL03311	bvSP	L3b	Asia	China	Henan	Northern China
SAL03450	bvSP	L3c	Asia	China	Hubei	Southern China
M265	bvSP	L2b	Asia	China	Zhejiang	Eastern China
SAL03425	bvSP	L3c	Asia	China	Jiangsu	Eastern China
ERS2630735	bvSP	L3b	Asia	China	Jiangsu	Eastern China
SAL03310	bvSP	L3b	Asia	China	Henan	Northern China
TH259	bvSP	L3c	Asia	China	Jiangxi	Eastern China
X93	bvSP	L2b	Asia	China	Zhejiang	Eastern China
X195	bvSP	L2b	Asia	China	Zhejiang	Eastern China
TH257	bvSP	L3c	Asia	China	Jiangxi	Eastern China
SAL03427	bvSP	L3c	Asia	China	Anhui	Eastern China
SAL_PA7721AA	bvSP	L2b	Asia	China	Jiangsu	Eastern China
M134	bvSP	L2b	Asia	China	Zhejiang	Eastern China
SAL_PA7720AA	bvSP	L3b	Asia	China	Jiangsu	Eastern China
SAL03451	bvSP	L3c	Asia	China	Hubei	Southern China
X156	bvSP	L2b	Asia	China	Zhejiang	Eastern China
SAL_PA7694AA	bvSP	L3b	Asia	China	Henan	Northern China
X135	bvSP	L2b	Asia	China	Zhejiang	Eastern China
SAL03332	bvSP	L3b	Asia	China	Henan	Northern China
MY0188	bvSP	L2a	Asia	China	Beijing	Northern China
SAL02678	bvSP	L3c	Asia	China	Guangdong	Southern China
SAL_PA7687AA	bvSP	L2b	Asia	China	Jiangsu	Eastern China
SAL_PA7733AA	bvSP	L3b	Asia	China	Jiangsu	Eastern China
SAL_PA7973AA	bvSP	L3b	Asia	China	Beijing	Northern China
SAL00733	bvSP	L2b	Asia	China	Jiangsu	Eastern China
6801_combined	bvSP	L1	Asia	China	Jiangsu	Eastern China
SAL02701	bvSP	L3c	Asia	China	Guangxi	Southern China
SAL03405	bvSP	L2a	Asia	China	Guangxi	Southern China
XXB1092	bvSP	L2b	Asia	China	Shanghai	Eastern China
SAL03406	bvSP	L3c	Asia	China	Guangxi	Southern China
