# Supplementary material for: Avian-specific Salmonella transition to endemicity is accompanied by localized resistome and mobilome interaction
Source: eLife. 2025 Mar 4;13:RP101241. doi: 10.7554/eLife.101241 (PMC11879110; doi:10.7554/eLife.101241)
Supplement: Supplementary file 4. [file elife-101241-supp4.xlsx]

## Sheet: Sheet1
Strain_name	Gastro	Invasive index	Lineage	Isolate Time	Continent	Country
M113	0.4789	0.5211	L2b	2022	Asia	China
M123	0.4477	0.5523	L2b	2022	Asia	China
M127	0.4699	0.5301	L2b	2022	Asia	China
M132	0.4637	0.5363	L2b	2022	Asia	China
M134	0.441	0.559	L2b	2022	Asia	China
M162	0.45	0.55	L2b	2022	Asia	China
M163	0.4425	0.5575	L2b	2022	Asia	China
M175	0.4373	0.5627	L2b	2022	Asia	China
M183	0.4408	0.5592	L2b	2022	Asia	China
M198	0.4386	0.5614	L2b	2023	Asia	China
M205	0.4363	0.5637	L2b	2023	Asia	China
M206	0.4571	0.5429	L2b	2023	Asia	China
M207	0.4426	0.5574	L2b	2023	Asia	China
M220	0.4409	0.5591	L2b	2023	Asia	China
M227	0.4468	0.5532	L2b	2023	Asia	China
M241	0.4497	0.5503	L2b	2023	Asia	China
M244	0.4385	0.5615	L2b	2023	Asia	China
M262	0.4463	0.5537	L2b	2023	Asia	China
M265	0.4556	0.5444	L2b	2023	Asia	China
M275	0.4792	0.5208	L2b	2023	Asia	China
M277	0.4493	0.5507	L2b	2023	Asia	China
M281	0.4484	0.5516	L2b	2023	Asia	China
M284	0.451	0.549	L2b	2023	Asia	China
M285	0.4498	0.5502	L2b	2023	Asia	China
M29	0.4387	0.5613	L2b	2022	Asia	China
M292	0.4462	0.5538	L2b	2023	Asia	China
M303	0.4375	0.5625	L2b	2023	Asia	China
M307	0.4797	0.5203	L2b	2023	Asia	China
M312	0.4462	0.5538	L2b	2023	Asia	China
M313	0.4364	0.5636	L2b	2023	Asia	China
M34	0.4534	0.5466	L2b	2022	Asia	China
M36	0.4543	0.5457	L2b	2022	Asia	China
M47	0.4629	0.5371	L2b	2022	Asia	China
M9-1	0.4736	0.5264	L2b	2022	Asia	China
M9-2	0.4594	0.5406	L2b	2022	Asia	China
M9-3	0.445	0.555	L2b	2022	Asia	China
M9-4	0.4332	0.5668	L2b	2022	Asia	China
M90-1	0.4499	0.5501	L2b	2022	Asia	China
E388-1	0.4775	0.5225	L3b	2023	Asia	China
E388-2	0.4971	0.5029	L3b	2023	Asia	China
E392-1	0.4702	0.5298	L3b	2023	Asia	China
E392-2	0.4642	0.5358	L3b	2023	Asia	China
E393-1	0.4971	0.5029	L3b	2023	Asia	China
E393-2	0.4725	0.5275	L3b	2023	Asia	China
E404	0.4539	0.5461	L2b	2023	Asia	China
