# Supplementary material for: Avian-specific Salmonella transition to endemicity is accompanied by localized resistome and mobilome interaction
Source: eLife. 2025 Mar 4;13:RP101241. doi: 10.7554/eLife.101241 (PMC11879110; doi:10.7554/eLife.101241)
Supplement: Supplementary file 6. [file elife-101241-supp6.xlsx]

## Sheet: Sheet1
Strain_name	ARG_Count	ARG	Lineage	Isolate Time	Continent	Country
SAL_PA7740AA	0	No ARG	L1	1968	Asia	China
7310	0	No ARG	L1	1985	Asia	China
MY0186	0	No ARG	L1	1985	Asia	China
7904	0	No ARG	L1	1985	Asia	China
SAL03395	0	No ARG	L1	2011	Asia	China
ERS2630790	0	No ARG	L1	1973	Asia	China
SAL03394	0	No ARG	L1	1995	Asia	China
7808	0	No ARG	L1	1985	Asia	China
SAL_PA7699AA	0	No ARG	L1	2008	Asia	China
6801	0	No ARG	L1	1985	Asia	China
SAL_WB8172AA	0	No ARG	L2a	2019	not collected	not collected
SAL_FB6635AA	0	No ARG	L2a	2017	South America	Brazil
SAL_IB1374AA	0	No ARG	L2a	2018	Europe	UK
SAL_WB7906AA	0	No ARG	L2a	2019	not collected	not collected
GCA_000462995.1	0	No ARG	L2a	1983	Asia	China
SAL_HB1901AA	0	No ARG	L2a	2018	Europe	UK
GCA_001448575.1	1	sul2	L2a	2007	Europe	UK
SAL_EA5139AA	0	No ARG	L2a	1938	not collected	not collected
GCA_015024685.1	0	No ARG	L2a	2013	Europe	Germany
SAL_FB6647AA	0	No ARG	L2a	2015	South America	Brazil
SAL_PA7743AA	0	No ARG	L2a	1999	South America	Brazil
SAL_LA6324AA	0	No ARG	L2a	1998	North America	USA
SAL_FB6666AA	0	No ARG	L2a	2017	South America	Brazil
GCA_000330485.2	0	No ARG	L2a	2012	North America	USA
WS749_S15	0	No ARG	L2a	< 1968	not collected	not collected
GCA_000521885.1	0	No ARG	L2a	2008	South America	Brazil
SRS1039523	0	No ARG	L2a	2004	not collected	not collected
SAL_EA5204AA	0	No ARG	L2a	1938	not collected	not collected
WS0750bis_S199	0	No ARG	L2a	< 1968	not collected	not collected
GCA_000486745.1	0	No ARG	L2a	2012	North America	Canada
SAL_FB2385AA	0	No ARG	L2a	2017	not collected	not collected
SAL_KA3410AA	0	No ARG	L2a	1994	Europe	UK
WS0753_S48	0	No ARG	L2a	< 1968	Europe	UK
ERS2630796	0	No ARG	L2a	2000	South America	Brazil
SAL_EB9539AA	0	No ARG	L2a	2018	not collected	not collected
WS747_S13	0	No ARG	L2a	< 1967	not collected	not collected
SAL_PA7982AA	0	No ARG	L2a	2001	South America	Brazil
SAL_EA4800AA	0	No ARG	L2a	1999	not collected	not collected
SAL_FA6266AA	0	No ARG	L2a	1938	not collected	not collected
SAL_IC1631AA	0	No ARG	L2a	2004	Europe	Germany
SAL_PA7731AA	0	No ARG	L2a	1985	Europe	UK
SAL_PA7981AA	0	No ARG	L2a	1986	Europe	UK
SAL_BB3471AA	0	No ARG	L2a	2014	South America	Brazil
SAL_LA5175AA	0	No ARG	L2a	2004	North America	USA
SAL_EA4799AA	0	No ARG	L2a	2011	North America	USA
GCA_000484295.1	0	No ARG	L2a	1990	not collected	not collected
SAL_PA7972AA	0	No ARG	L2a	1986	Europe	UK
SAL_PA7969AA	0	No ARG	L2a	1993	Europe	UK
MY0335	0	No ARG	L2a	1970	Europe	UK
WS0754_S49	0	No ARG	L2a	< 1968	not collected	not collected
WS755_S18	0	No ARG	L2a	< 1968	not collected	not collected
MY0188	0	No ARG	L2a	1984	Asia	China
SAL_PA7979AA	0	No ARG	L2a	1966	South America	Brazil
SAL03405	0	No ARG	L2a	2018	Asia	China
MY0332	0	No ARG	L2a	1939	Europe	Denmark
SAL_PA7980AA	0	No ARG	L2b	1949	Europe	Denmark
SAL03290	2	blaTEM-1B, sul2	L2b	2015	Asia	China
SAL00722	1	blaTEM-116	L2b	2015	Asia	China
SAL_CB8582AA	0	No ARG	L2b	2016	Europe	UK
M36	0	No ARG	L2b	2022	Asia	China
X17	0	No ARG	L2b	2022	Asia	China
M244	0	No ARG	L2b	2023	Asia	China
SAL00730	0	No ARG	L2b	2015	Asia	China
SAL02669	2	blaTEM-1B, sul2	L2b	2011	Asia	China
M183	0	No ARG	L2b	2022	Asia	China
X129	0	No ARG	L2b	2022	Asia	China
SAL04025	3	blaTEM-1B, sul2, aph(3)-IIa	L2b	2017	Asia	China
M262	0	No ARG	L2b	2023	Asia	China
X186-2	0	No ARG	L2b	2022	Asia	China
SAL03436	2	blaTEM-1B, sul2	L2b	2012	Asia	China
X206	0	No ARG	L2b	2022	Asia	China
X159	0	No ARG	L2b	2022	Asia	China
SAL04094	2	blaTEM-1B, sul2	L2b	2019	Asia	China
XXB1725	2	sul2, blaTEM-1B	L2b	2017	Asia	China
GCA_900067255.1	0	No ARG	L2b	1987	Europe	UK
M34	0	No ARG	L2b	2022	Asia	China
SAL02668	2	blaTEM-1B, sul2	L2b	2011	Asia	China
SAL00729	0	No ARG	L2b	2015	Asia	China
M9-2	0	No ARG	L2b	2022	Asia	China
M284	0	No ARG	L2b	2023	Asia	China
SAL00715	0	No ARG	L2b	2014	Asia	China
SAL_PA7978AA	0	No ARG	L2b	1953	Europe	UK
X124	0	No ARG	L2b	2022	Asia	China
M175	0	No ARG	L2b	2022	Asia	China
X166	0	No ARG	L2b	2022	Asia	China
M220	0	No ARG	L2b	2023	Asia	China
X38	0	No ARG	L2b	2022	Asia	China
SAL03506	0	No ARG	L2b	2019	Asia	China
SAL_PA7704AA	0	No ARG	L2b	2013	Asia	China
M292	0	No ARG	L2b	2023	Asia	China
M277	0	No ARG	L2b	2023	Asia	China
SAL_PA7756AA	0	No ARG	L2b	1971	Asia	China
SAL04026	2	blaTEM-1B, sul2	L2b	2017	Asia	China
M127	0	No ARG	L2b	2022	Asia	China
M285	0	No ARG	L2b	2023	Asia	China
X2	0	No ARG	L2b	2022	Asia	China
M198	0	No ARG	L2b	2023	Asia	China
MY0123	1	sul2	L2b	1939	Europe	Denmark
E404	2	blaTEM-1B, sul2	L2b	2023	Asia	China
M312	0	No ARG	L2b	2023	Asia	China
SAL04091	2	blaTEM-1B, sul2	L2b	2019	Asia	China
SAL03308	2	blaTEM-1B, sul2	L2b	2015	Asia	China
X6	0	No ARG	L2b	2022	Asia	China
M9-4	0	No ARG	L2b	2022	Asia	China
M241	0	No ARG	L2b	2023	Asia	China
ERS2630780	0	No ARG	L2b	1998	South America	Brazil
X89	0	No ARG	L2b	2022	Asia	China
X216	0	No ARG	L2b	2022	Asia	China
M205	0	No ARG	L2b	2023	Asia	China
X5	0	No ARG	L2b	2022	Asia	China
SAL03439	2	blaTEM-1B, sul2	L2b	2012	Asia	China
X90	0	No ARG	L2b	2022	Asia	China
X113	0	No ARG	L2b	2022	Asia	China
X130	0	No ARG	L2b	2022	Asia	China
SAL02649	2	blaTEM-1B, sul2	L2b	2018	Asia	China
X177-2	0	No ARG	L2b	2022	Asia	China
SAL03307	2	blaTEM-1B, sul2	L2b	2015	Asia	China
X187	0	No ARG	L2b	2022	Asia	China
M162	0	No ARG	L2b	2022	Asia	China
SAL_PA7692AA	0	No ARG	L2b	1962	Asia	China
MY0334	0	No ARG	L2b	1970	Europe	UK
XXB1089	0	No ARG	L2b	2011	Asia	China
SAL_PA7738AA	0	No ARG	L2b	1987	Europe	UK
SAL02650	2	blaTEM-1B, sul2	L2b	2018	Asia	China
SAL_PB9893AA_AS	2	blaTEM-1B, sul2	L2b	2018	Europe	France
SAL_PB9895AA_AS	2	blaTEM-1B, sul2	L2b	2019	Europe	France
GCA_000953595.1	0	No ARG	L2b	1987	not collected	not collected
M47	0	No ARG	L2b	2022	Asia	China
MY0333	0	No ARG	L2b	1970	Europe	UK
SAL02667	2	blaTEM-1B, sul2	L2b	2011	Asia	China
SAL00732	0	No ARG	L2b	2015	Asia	China
X170	0	No ARG	L2b	2022	Asia	China
M123	0	No ARG	L2b	2022	Asia	China
SAL03507	0	No ARG	L2b	2019	Asia	China
SAL02672	2	sul2, blaTEM-1B	L2b	2011	Asia	China
X97	0	No ARG	L2b	2022	Asia	China
X13	0	No ARG	L2b	2022	Asia	China
SAL02671	2	blaTEM-1B, sul2	L2b	2011	Asia	China
SAL02648	2	blaTEM-1B, sul2	L2b	2018	Asia	China
X169	0	No ARG	L2b	2022	Asia	China
X215	0	No ARG	L2b	2022	Asia	China
SAL04029	2	blaTEM-1B, sul2	L2b	2017	Asia	China
M207	0	No ARG	L2b	2023	Asia	China
SAL_PA7751AA	0	No ARG	L2b	2001	South America	Brazil
SAL04028	2	blaTEM-1B, sul2	L2b	2017	Asia	China
X10	0	No ARG	L2b	2022	Asia	China
X177	0	No ARG	L2b	2022	Asia	China
X186	0	No ARG	L2b	2022	Asia	China
X176	0	No ARG	L2b	2022	Asia	China
M281	0	No ARG	L2b	2023	Asia	China
SAL02670	2	blaTEM-1B, sul2	L2b	2011	Asia	China
M9-1	0	No ARG	L2b	2022	Asia	China
SAL02673	2	blaTEM-1B, sul2	L2b	2011	Asia	China
SAL04090	2	blaTEM-1B, sul2	L2b	2019	Asia	China
SAL04095	2	blaTEM-1B, sul2	L2b	2019	Asia	China
SAL03437	2	blaTEM-1B, sul2	L2b	2012	Asia	China
X79	0	No ARG	L2b	2022	Asia	China
SAL03497	0	No ARG	L2b	2019	Asia	China
M307	0	No ARG	L2b	2023	Asia	China
SRR26663521	0	No ARG	L2b	2022	Asia	China
X153	0	No ARG	L2b	2022	Asia	China
X67	0	No ARG	L2b	2022	Asia	China
M113	0	No ARG	L2b	2022	Asia	China
X134	0	No ARG	L2b	2022	Asia	China
SAL03286	2	blaTEM-1B, sul2	L2b	2015	Asia	China
SAL_KA3505AA	0	No ARG	L2b	2006	Asia	China
SAL00726	0	No ARG	L2b	2015	Asia	China
SAL03303	2	blaTEM-1B, sul2	L2b	2015	Asia	China
X19	0	No ARG	L2b	2022	Asia	China
X82	0	No ARG	L2b	2022	Asia	China
M275	0	No ARG	L2b	2023	Asia	China
X105	0	No ARG	L2b	2022	Asia	China
SAL_PA7710AA	0	No ARG	L2b	2008	Asia	China
X98	0	No ARG	L2b	2022	Asia	China
X230	0	No ARG	L2b	2022	Asia	China
SAL03402	2	blaTEM-1B, sul2	L2b	2014	Asia	China
M303	0	No ARG	L2b	2023	Asia	China
X165	0	No ARG	L2b	2022	Asia	China
X26	0	No ARG	L2b	2022	Asia	China
M29	0	No ARG	L2b	2022	Asia	China
M90-1	0	No ARG	L2b	2022	Asia	China
X84	0	No ARG	L2b	2022	Asia	China
ERS2630810	0	No ARG	L2b	1986	Europe	UK
SAL00728	0	No ARG	L2b	2015	Asia	China
SAL02666	0	No ARG	L2b	2011	Asia	China
X65	0	No ARG	L2b	2022	Asia	China
X140	0	No ARG	L2b	2022	Asia	China
SAL03496	0	No ARG	L2b	2019	Asia	China
SAL00731	0	No ARG	L2b	2015	Asia	China
SAL03291	2	blaTEM-1B, sul2	L2b	2015	Asia	China
X207	0	No ARG	L2b	2022	Asia	China
M227	0	No ARG	L2b	2023	Asia	China
SAL_PA7742AA	0	No ARG	L2b	1982	Asia	China
M9-3	0	No ARG	L2b	2022	Asia	China
SAL_PA7717AA	0	No ARG	L2b	1973	Asia	China
M206	0	No ARG	L2b	2023	Asia	China
M132	0	No ARG	L2b	2022	Asia	China
SAL02647	2	blaTEM-1B, sul2	L2b	2017	Asia	China
X237	0	No ARG	L2b	2022	Asia	China
X145	0	No ARG	L2b	2022	Asia	China
ERS2630773	0	No ARG	L2b	1949	Europe	Denmark
ERS088716	0	No ARG	L2b	1987	not collected	not collected
M313	0	No ARG	L2b	2023	Asia	China
M163	0	No ARG	L2b	2022	Asia	China
X80	0	No ARG	L2b	2022	Asia	China
X49	0	No ARG	L2b	2022	Asia	China
SAL03306	2	blaTEM-1B, sul2	L2b	2015	Asia	China
SAL_FB6640AA	0	No ARG	L2b	2014	South America	Brazil
M265	0	No ARG	L2b	2023	Asia	China
X93	0	No ARG	L2b	2022	Asia	China
X195	0	No ARG	L2b	2022	Asia	China
SAL_PA7721AA	0	No ARG	L2b	1968	Asia	China
M134	0	No ARG	L2b	2022	Asia	China
X156	0	No ARG	L2b	2022	Asia	China
X135	0	No ARG	L2b	2022	Asia	China
SAL_PA7687AA	0	No ARG	L2b	1967	Asia	China
SAL00733	0	No ARG	L2b	2015	Asia	China
XXB1092	2	blaTEM-1B, sul2	L2b	2011	Asia	China
SAL03326	3	tet(A), blaTEM-1B, sul2	L3c	2015	Asia	China
SAL04093	2	blaTEM-1B, sul2	L3c	2019	Asia	China
SAL04092	2	blaTEM-1B, sul2	L3c	2019	Asia	China
SAL03440	3	tet(A), blaTEM-1B, sul2	L3c	2012	Asia	China
SAL03330	3	tet(A), blaTEM-1B, sul2	L3c	2015	Asia	China
TH254	2	blaTEM-1B, sul2	L3c	2022	Asia	China
SAL03328	3	tet(A), blaTEM-1B, sul2	L3c	2015	Asia	China
SAL03428	2	blaTEM-1B, sul2	L3c	2012	Asia	China
SAL03422	2	blaTEM-1B, sul2	L3c	2013	Asia	China
SAL04035	3	blaTEM-1B, tet(A), sul2	L3c	2017	Asia	China
SAL03423	2	blaTEM-1B, sul2	L3c	2018	Asia	China
SAL02657	2	blaTEM-1B, sul2	L3c	2018	Asia	China
SAL_PA7759AA	3	blaTEM-1B, tet(A), sul2	L3c	2014	Asia	China
SAL03421	2	blaTEM-1B, sul2	L3c	2018	Asia	China
SAL03309	2	blaTEM-1B, sul2	L3c	2015	Asia	China
SAL02702	2	blaTEM-1B, sul2	L3c	2018	Asia	China
SAL03453	3	blaTEM-1B, tet(A), sul2	L3c	2016	Asia	China
SAL03302	5	blaTEM-1B, sul2, tet(A), dfrA17, aadA5	L3c	2015	Asia	China
SAL04098	2	blaTEM-1B, sul2	L3c	2017	Asia	China
SAL00708	2	blaTEM-1B, sul2	L3c	2014	Asia	China
SAL03297	2	blaTEM-1B, sul2	L3c	2015	Asia	China
SAL02676	2	blaTEM-1B, sul2	L3c	2013	Asia	China
SAL03397	2	blaTEM-1B, sul2	L3c	2014	Asia	China
SAL03438	2	blaTEM-1B, sul2	L3c	2012	Asia	China
SAL03298	3	blaTEM-1B, tet(A), sul2	L3c	2015	Asia	China
SAL02699	2	blaTEM-1B, sul2	L3c	2018	Asia	China
SAL_PA7698AA	2	blaTEM-1B, sul2	L3c	2008	Asia	China
SAL04102	3	tet(A), blaTEM-1B, sul2	L3c	2017	Asia	China
SAL04100	3	tet(A), blaTEM-1B, sul2	L3c	2017	Asia	China
SAL02664	2	blaTEM-1B, sul2	L3c	2018	Asia	China
TH256	2	blaTEM-1B, sul2	L3c	2022	Asia	China
SAL02681	2	blaTEM-1B, sul2	L3c	2013	Asia	China
SAL04017	2	blaTEM-1B, sul2	L3c	2017	Asia	China
SAL_PA7730AA	3	blaTEM-1B, tet(A), sul2	L3c	2014	Asia	China
SAL03435	2	blaTEM-1B, sul2	L3c	2009	Asia	China
SAL03296	3	blaTEM-1B, tet(A), sul2	L3c	2015	Asia	China
SAL03408	2	blaTEM-1B, sul2	L3c	2018	Asia	China
SAL00717	3	blaTEM-1B, tet(A), sul2	L3c	2014	Asia	China
SAL00734	3	blaTEM-1B, tet(A), sul2	L3c	2016	Asia	China
SAL02654	3	blaTEM-1B, tet(A), sul2	L3c	2018	Asia	China
SAL03415	3	blaTEM-1B, tet(A), sul2	L3c	2018	Asia	China
SAL02674	2	blaTEM-1B, sul2	L3c	2013	Asia	China
SAL04101	3	tet(A), blaTEM-1B, sul2	L3c	2017	Asia	China
SAL02661	3	blaTEM-1B, tet(A), sul2	L3c	2018	Asia	China
SAL04018	2	blaTEM-1B, sul2	L3c	2017	Asia	China
SAL02700	2	blaTEM-1B, sul2	L3c	2018	Asia	China
SAL03419	3	blaTEM-1B, tet(A), sul2	L3c	2018	Asia	China
SAL03413	2	blaTEM-1B, sul2	L3c	2018	Asia	China
SAL02675	2	blaTEM-1B, sul2	L3c	2013	Asia	China
SAL03448	2	blaTEM-1B, sul2	L3c	2013	Asia	China
SAL03403	2	blaTEM-1B, sul2	L3c	2014	Asia	China
SAL00746	2	blaTEM-1B, sul2	L3c	2017	Asia	China
SAL04020	2	blaTEM-1B, sul2	L3c	2017	Asia	China
SAL03593	2	blaTEM-1B, sul2	L3c	2019	Asia	China
SAL02651	3	blaTEM-1B, sul2, tet(A)	L3c	2018	Asia	China
SAL03294	3	blaTEM-1B, tet(A), sul2	L3c	2015	Asia	China
SAL03426	3	tet(A), blaTEM-1B, sul2	L3c	2011	Asia	China
SAL02652	3	blaTEM-1B, tet(A), sul2	L3c	2018	Asia	China
SAL03295	3	blaTEM-1B, tet(A), sul2	L3c	2015	Asia	China
SAL03433	2	blaTEM-1B, sul2	L3c	2014	Asia	China
SAL03432	2	blaTEM-1B, sul2	L3c	2014	Asia	China
TH260	2	blaTEM-1B, sul2	L3c	2022	Asia	China
C15_FKDN220483769-1A_H25LVDSX5_L3	2	blaTEM-1B, sul2	L3c	2020	Asia	China
SAL00718	2	blaTEM-1B, sul2	L3c	2014	Asia	China
SAL04099	2	blaTEM-1B, sul2	L3c	2017	Asia	China
SAL_GB9917AA	2	sul2, blaTEM-1B	L3c	2017	Asia	China
SAL02662	2	blaTEM-1B, sul2	L3c	2018	Asia	China
SAL03429	2	blaTEM-1B, sul2	L3c	2012	Asia	China
SAL03314	3	blaTEM-1B, tet(A), sul2	L3c	2014	Asia	China
SAL_PA7696AA	2	blaTEM-1B, sul2	L3c	2009	Asia	China
ERS2630811	3	blaTEM-1B, tet(A), sul2	L3c	2014	Asia	China
SAL03407	3	blaTEM-1B, tet(A), sul2	L3c	2018	Asia	China
SAL03431	3	tet(A), blaTEM-1B, sul2	L3c	2012	Asia	China
SAL03329	3	tet(A), blaTEM-1B, sul2	L3c	2015	Asia	China
SAL03325	2	blaTEM-1B, sul2	L3c	2015	Asia	China
SAL_PA7701AA	2	blaTEM-1B, sul2	L3c	2014	Asia	China
SAL02663	3	blaTEM-1B, tet(A), sul2	L3c	2018	Asia	China
SAL_PA7745AA	2	blaTEM-1B, sul2	L3c	2014	Asia	China
SAL03417	2	blaTEM-1B, sul2	L3c	2018	Asia	China
SAL03416	2	blaTEM-1B, sul2	L3c	2018	Asia	China
SAL03615	3	tet(A), blaTEM-1B, sul2	L3c	2020	Asia	China
SAL03434	2	blaTEM-1B, sul2	L3c	2009	Asia	China
TH261	2	blaTEM-1B, sul2	L3c	2022	Asia	China
SAL04097	2	blaTEM-1B, sul2	L3c	2017	Asia	China
SAL03282	2	blaTEM-1B, sul2	L3c	2015	Asia	China
SAL03292	3	tet(A), blaTEM-1B, sul2	L3c	2015	Asia	China
SAL04031	3	tet(A), blaTEM-1B, sul2	L3c	2017	Asia	China
SAL_PA7686AA	2	blaTEM-1B, sul2	L3c	2009	Asia	China
SAL00739	2	blaTEM-1B, sul2	L3c	2017	Asia	China
SAL03430	6	blaTEM-1B, sul1, aadA5, dfrA17, sul2, tet(A)	L3c	2012	Asia	China
SAL03449	2	blaTEM-1B, sul2	L3c	2013	Asia	China
SAL03411	3	blaTEM-1B, tet(A), sul2	L3c	2018	Asia	China
SAL02665	2	blaTEM-1B, sul2	L3c	2018	Asia	China
SAL03414	2	blaTEM-1B, sul2	L3c	2018	Asia	China
SAL_PA7719AA	2	blaTEM-1B, sul2	L3c	2009	Asia	China
SAL03301	3	blaTEM-1B, sul2, tet(A)	L3c	2015	Asia	China
SAL03304	3	tet(A), blaTEM-1B, sul2	L3c	2015	Asia	China
SAL00744	2	blaTEM-1B, sul2	L3c	2017	Asia	China
SAL02677	3	tet(A), blaTEM-1B, sul2	L3c	2013	Asia	China
C49_FKDN220483803-1A_H25LVDSX5_L1	2	blaTEM-1B, sul2	L3c	not collected	Asia	China
SAL00735	2	blaTEM-1B, sul2	L3c	2016	Asia	China
SRR26662937	2	blaTEM-1B, sul2	L3c	2022	Asia	China
SAL03293	3	tet(A), blaTEM-1B, sul2	L3c	2015	Asia	China
SAL03418	2	blaTEM-1B, sul2	L3c	2018	Asia	China
SAL03452	2	blaTEM-1B, sul2	L3c	2013	Asia	China
SAL03409	3	blaTEM-1B, tet(A), sul2	L3c	2018	Asia	China
SAL02698	2	blaTEM-1B, sul2	L3c	2018	Asia	China
SAL00725	2	blaTEM-1B, sul2	L3c	2015	Asia	China
SAL02656	3	blaTEM-1B, tet(A), sul2	L3c	2018	Asia	China
C13_FKDN220485113-1A_H25L7DSX5_L2	2	blaTEM-1B, sul2	L3c	2020	Asia	China
SAL03300	2	blaTEM-1B, sul2	L3c	2015	Asia	China
SAL00738	2	blaTEM-1B, sul2	L3c	2017	Asia	China
SAL_UA3243AA	3	blaTEM-1B, tet(A), sul2	L3c	2014	Asia	China
SAL00743	2	blaTEM-1B, sul2	L3c	2017	Asia	China
SAL03315	3	tet(A), blaTEM-1B, sul2	L3c	2014	Asia	China
SAL03327	3	tet(A), blaTEM-1B, sul2	L3c	2015	Asia	China
SAL02658	3	blaTEM-1B, tet(A), sul2	L3c	2018	Asia	China
R51	0	No ARG	L3c	2017	Asia	China
SAL02653	2	blaTEM-1B, sul2	L3c	2018	Asia	China
SAL04034	2	blaTEM-1B, sul2	L3c	2017	Asia	China
SAL04096	2	blaTEM-1B, sul2	L3c	2017	Asia	China
SAL03401	2	blaTEM-1B, sul2	L3c	2014	Asia	China
SAL02659	3	blaTEM-1B, tet(A), sul2	L3c	2018	Asia	China
SAL03288	3	blaTEM-1B, tet(A), sul2	L3c	2015	Asia	China
SAL03420	2	blaTEM-1B, sul2	L3c	2018	Asia	China
SAL_PA7729AA	2	blaTEM-1B, sul2	L3c	2009	Asia	China
SAL02660	3	tet(A), blaTEM-1B, sul2	L3c	2018	Asia	China
SAL04019	2	blaTEM-1B, sul2	L3c	2017	Asia	China
TH255	2	blaTEM-1B, sul2	L3c	2022	Asia	China
SAL00737	3	blaTEM-1B, tet(A), sul2	L3c	2017	Asia	China
SAL_PA7723AA	2	blaTEM-1B, sul2	L3c	2009	Asia	China
SAL04032	3	blaTEM-1B, tet(A), sul2	L3c	2017	Asia	China
SAL03450	2	blaTEM-1B, sul2	L3c	2013	Asia	China
SAL03425	3	tet(A), blaTEM-1B, sul2	L3c	2011	Asia	China
TH259	2	blaTEM-1B, sul2	L3c	2022	Asia	China
TH257	2	blaTEM-1B, sul2	L3c	2022	Asia	China
SAL03427	2	blaTEM-1B, sul2	L3c	2011	Asia	China
SAL03451	2	blaTEM-1B, sul2	L3c	2013	Asia	China
SAL02678	2	blaTEM-1B, sul2	L3c	2013	Asia	China
SAL02701	2	blaTEM-1B, sul2	L3c	2018	Asia	China
SAL03406	3	blaTEM-1B, tet(A), sul2	L3c	2018	Asia	China
SAL00724	0	No ARG	L3b	2015	Asia	China
SRR24215044	0	No ARG	L3b	2021	Europe	Netherland
SAL00700	2	sul2, aph(3")-Ib	L3b	2013	Asia	China
SAL_PA7718AA	0	No ARG	L3b	2014	Asia	China
SAL_PA7725AA	4	blaTEM-1B, sul2, aph(6')-Id, tet(A)	L3b	1993	Asia	China
SAL04024	0	No ARG	L3b	2017	Asia	China
SAL_FB2387AA	0	No ARG	L3b	2017	not collected	not collected
SAL03334	4	tet(A), sul1, aadA5, dfrA17	L3b	2015	Asia	China
SAL_PA7702AA	0	No ARG	L3b	2008	Asia	China
SRR24215038	0	No ARG	L3b	2021	Europe	Netherland
SAL_PA7755AA	0	No ARG	L3b	2012	Asia	China
SAL_PA6310AA	4	sul2, aph(3")-Ib, aph(6')-Id, tet(A)	L3b	1962	Asia	China
SAL_PA7689AA	0	No ARG	L3b	2013	Asia	China
ERS2630752	0	No ARG	L3b	2008	Asia	China
ERS1867654	0	No ARG	L3b	2012	Europe	Sweden
SAL00712	4	dfrA17, aadA5, sul1, tet(A)	L3b	2014	Asia	China
SAL_PA7727AA	0	No ARG	L3b	1998	Asia	China
SAL03287	0	No ARG	L3b	2015	Asia	China
SAL03305	0	No ARG	L3b	2015	Asia	China
E393-2	0	No ARG	L3b	2023	Asia	China
SAL03321	3	tet(A), sul1, dfrA17	L3b	2014	Asia	China
SAL_PA7971AA	4	dfrA17, aadA5, sul1, tet(A)	L3b	1998	Asia	China
SAL03318	0	No ARG	L3b	2014	Asia	China
SAL03324	0	No ARG	L3b	2014	Asia	China
SRR24215036	0	No ARG	L3b	2021	Europe	Netherland
SAL_PA7757AA	0	No ARG	L3b	2008	Asia	China
SAL03331	4	tet(A), sul1, aadA5, dfrA17	L3b	2014	Asia	China
SAL04027	4	tet(A), sul2, aph(3")-Ib, aph(6')-Id	L3b	2017	Asia	China
SAL03323	4	sul1, aadA5, dfrA17, tet(A)	L3b	2014	Asia	China
SAL00741	4	aph(6')-Id, aph(3")-Ib, sul2, tet(A)	L3b	2017	Asia	China
GCA_015024695.1	0	No ARG	L3b	2013	Europe	Germany
ERS1867657	0	No ARG	L3b	2012	Europe	Sweden
SAL04037	4	sul1, aadA5, dfrA17, tet(A)	L3b	2017	Asia	China
SAL02679	0	No ARG	L3b	2013	Asia	China
SAL03386	6	blaTEM-1B, tet(A), sul2, sul1, aadA5, dfrA17	L3b	2008	Asia	China
ERS2630720	0	No ARG	L3b	1965	Asia	China
SRR24215042	0	No ARG	L3b	2021	Europe	Netherland
SAL_PA7758AA	0	No ARG	L3b	1973	Asia	China
MY0189	0	No ARG	L3b	1954	Asia	China
SAL04030	4	sul1, aadA5, dfrA17, tet(A)	L3b	2017	Asia	China
SAL02694	4	dfrA17, aadA5, sul1, tet(A)	L3b	2018	Asia	China
SAL00747	4	tet(A), aph(6')-Id, aph(3")-Ib, sul2	L3b	2017	Asia	China
SAL_PA7711AA	0	No ARG	L3b	1980	Asia	China
SAL_RB4558AA	0	No ARG	L3b	2019	Europe	Denmark
SRR24215048	0	No ARG	L3b	2021	Europe	Netherland
SAL00745	4	dfrA17, aadA5, sul1, tet(A)	L3b	2017	Asia	China
SAL_PA7724AA	0	No ARG	L3b	1998	Asia	China
SRR24215040	0	No ARG	L3b	2021	Europe	Netherland
SAL_PA7708AA	0	No ARG	L3b	1986	Asia	China
ERS2630765	0	No ARG	L3b	2013	Asia	China
ERS2630722	0	No ARG	L3b	1967	Asia	China
SAL_PA7983AA	0	No ARG	L3b	2007	Asia	China
SAL_PA7705AA	0	No ARG	L3b	1978	Asia	China
ERS1867656	0	No ARG	L3b	2012	Europe	Sweden
SAL02695	4	tet(A), sul1, aadA5, dfrA17	L3b	2018	Asia	China
ERS2630744	4	tet(A), sul1, aadA5, dfrA17	L3b	2006	Asia	China
ERS2630738	0	No ARG	L3b	1998	Asia	China
SAL_PA7703AA	3	tet(A), sul1, dfrA17	L3b	2008	Asia	China
SAL03285	0	No ARG	L3b	2015	Asia	China
SAL_PA7737AA	3	tet(A), sul1, dfrA17	L3b	2008	Asia	China
SAL_PA7968AA	0	No ARG	L3b	1952	Europe	Denmark
SAL_PA7975AA	0	No ARG	L3b	1971	Asia	China
SAL00714	4	tet(A), sul1, aadA5, dfrA17	L3b	2014	Asia	China
SAL03392	0	No ARG	L3b	2013	Asia	China
SRR24215039	0	No ARG	L3b	2021	Europe	Netherland
SAL03335	0	No ARG	L3b	2015	Asia	China
GCA_015024735.1	0	No ARG	L3b	2013	Europe	Germany
SAL00742	1	blaTEM-116	L3b	2017	Asia	China
SAL03313	0	No ARG	L3b	2014	Asia	China
SAL_PA7974AA	0	No ARG	L3b	1998	Asia	China
SAL03446	0	No ARG	L3b	2013	Asia	China
SAL04023	0	No ARG	L3b	2017	Asia	China
SAL_PA7754AA	0	No ARG	L3b	1986	Asia	China
ERS2630732	0	No ARG	L3b	1973	Asia	China
SAL_PA7734AA	0	No ARG	L3b	1994	Asia	China
SAL00713	4	dfrA17, aadA5, sul1, tet(A)	L3b	2014	Asia	China
SAL_PA7722AA	0	No ARG	L3b	1997	Asia	China
SAL03289	4	dfrA17, aadA5, sul1, tet(A)	L3b	2015	Asia	China
ERS2630728	0	No ARG	L3b	1986	Asia	China
SAL_PA7716AA	4	dfrA17, aadA5, sul1, tet(A)	L3b	2003	Asia	China
SAL_PA7695AA	5	tet(A), blaTEM-1B, aph(6')-Id, aph(3")-Ib, sul2	L3b	1998	Asia	China
SAL00736	1	blaTEM-116	L3b	2017	Asia	China
SRR24215045	0	No ARG	L3b	2021	Europe	Netherland
SAL03391	0	No ARG	L3b	2013	Asia	China
MY0185	0	No ARG	L3b	2009	Asia	China
ERS2630718	0	No ARG	L3b	1962	Asia	China
SAL03388	3	blaTEM-1B, sul2, tet(A)	L3b	2011	Asia	China
SAL_PA7693AA	0	No ARG	L3b	2012	Asia	China
SAL_FB2386AA	0	No ARG	L3b	2017	not collected	not collected
SAL_PA7736AA	0	No ARG	L3b	2004	Asia	China
ERS1867658	0	No ARG	L3b	2012	Europe	Sweden
SAL03319	4	tet(A), aph(6')-Id, aph(3")-Ib, sul2	L3b	2014	Asia	China
ERS2630729	0	No ARG	L3b	1986	Asia	China
GCA_015024675.1	0	No ARG	L3b	2013	Europe	Germany
ERS1867655	0	No ARG	L3b	2012	Europe	Sweden
SAL00710	0	No ARG	L3b	2014	Asia	China
SAL03404	4	dfrA17, aadA5, sul1, tet(A)	L3b	2012	Asia	China
SAL03317	0	No ARG	L3b	2014	Asia	China
E388-2	0	No ARG	L3b	2023	Asia	China
SRR24215037	0	No ARG	L3b	2021	Europe	Netherland
SRR24215047	0	No ARG	L3b	2021	Europe	Netherland
SAL04036	0	No ARG	L3b	2017	Asia	China
E392-2	0	No ARG	L3b	2023	Asia	China
ERS1867653	0	No ARG	L3b	2012	Europe	Sweden
SAL03333	4	tet(A), sul1, aadA5, dfrA17	L3b	2014	Asia	China
SAL02703	4	tet(A), dfrA17, aadA5, sul1	L3b	2018	Asia	China
SAL_PA7976AA	5	blaTEM-1B, tet(A), aph(6')-Id, aph(3")-Ib, sul2	L3b	2003	Asia	China
SAL03442	0	No ARG	L3b	2013	Asia	China
SAL04021	0	No ARG	L3b	2017	Asia	China
E388-1	0	No ARG	L3b	2023	Asia	China
SAL02680	4	tet(A), dfrA17, aadA5, sul1	L3b	2013	Asia	China
SAL00711	4	dfrA17, aadA5, sul1, tet(A)	L3b	2014	Asia	China
SAL03443	0	No ARG	L3b	2013	Asia	China
SAL02696	4	tet(A), dfrA17, aadA5, sul1	L3b	2018	Asia	China
SAL_PA7747AA	0	No ARG	L3b	1998	Asia	China
SAL04033	0	No ARG	L3b	2017	Asia	China
SAL_PA7741AA	4	tet(A), aph(6')-Id, aph(3")-Ib, sul2	L3b	1965	Asia	China
SRR24215049	0	No ARG	L3b	2021	Europe	Netherland
SAL02697	3	tet(A), aadA5, sul1	L3b	2018	Asia	China
SAL_FB2384AA	0	No ARG	L3b	2017	not collected	not collected
SRR24215034	0	No ARG	L3b	2021	Europe	Netherland
ERS2630739	0	No ARG	L3b	1998	Asia	China
SAL03396	0	No ARG	L3b	2014	Asia	China
SAL03316	4	sul1, aadA5, dfrA17, tet(A)	L3b	2014	Asia	China
SAL_PA7700AA	4	blaTEM-1B, sul2, aph(3")-Ib, aph(6')-Id	L3b	1998	Asia	China
SAL03337	0	No ARG	L3b	2015	Asia	China
SAL03320	4	tet(A), aph(6')-Id, aph(3")-Ib, sul2	L3b	2014	Asia	China
SRR24215043	0	No ARG	L3b	2021	Europe	Netherland
SAL03312	6	dfrA17, aadA5, sul1, tet(A), sul2, blaTEM-1B	L3b	2014	Asia	China
TH184	0	No ARG	L3b	2022	Asia	China
SAL_PA7746AA	0	No ARG	L3b	2012	Asia	China
SAL00705	4	aph(6')-Id, aph(3")-Ib, sul2, blaTEM-116	L3b	2014	Asia	China
ERS2630724	0	No ARG	L3b	1968	Asia	China
SAL03385	3	blaTEM-1B, sul2, tet(A)	L3b	1978	Asia	China
SAL03444	0	No ARG	L3b	2013	Asia	China
SRR24215046	0	No ARG	L3b	2021	Europe	Netherland
SAL_PA7713AA	0	No ARG	L3b	1965	Asia	China
SAL_PA7707AA	4	tet(A), sul1, aadA5, dfrA17	L3b	2012	Asia	China
SAL00707	0	No ARG	L3b	2014	Asia	China
SAL_PA7750AA	0	No ARG	L3b	2008	Asia	China
SAL_PA7970AA	3	dfrA17, sul1, tet(A)	L3b	2009	Asia	China
SAL03445	0	No ARG	L3b	2013	Asia	China
E392-1	0	No ARG	L3b	2023	Asia	China
SAL_PA7977AA	0	No ARG	L3b	2006	Asia	China
SAL_EA6570AA	0	No ARG	L3b	2012	not collected	not collected
SAL_PA7749AA	0	No ARG	L3b	1967	Asia	China
SAL_PA7753AA	4	dfrA17, aadA5, sul1, tet(A)	L3b	2005	Asia	China
SAL00740	5	sul2, aph(3")-Ib, aph(6')-Id, tet(A), blaTEM-116	L3b	2017	Asia	China
SAL03390	0	No ARG	L3b	2012	Asia	China
E393-1	0	No ARG	L3b	2023	Asia	China
SAL03322	3	sul1, dfrA17, tet(A)	L3b	2014	Asia	China
SAL_PA0702AA	4	sul2, aph(3")-Ib, aph(6')-Id, tet(A)	L3b	1962	Asia	China
SAL_PA7752AA	4	dfrA17, aadA5, sul1, tet(A)	L3b	2014	Asia	China
SAL_PA7706AA	0	No ARG	L3b	1979	Asia	China
SAL_RB4559AA	0	No ARG	L3b	2019	Europe	Denmark
SRR24215035	0	No ARG	L3b	2021	Europe	Netherland
SAL03441	4	sul1, aadA5, dfrA17, tet(A)	L3b	2013	Asia	China
SAL03447	0	No ARG	L3b	2013	Asia	China
SAL_TA8783AA	0	No ARG	L3b	2004	Europe	Germany
SAL04022	0	No ARG	L3b	2017	Asia	China
SAL03311	4	dfrA17, aadA5, sul1, tet(A)	L3b	2015	Asia	China
SRR24215041	0	No ARG	L3b	2021	Europe	Netherland
ERS2630735	0	No ARG	L3b	1985	Asia	China
SAL03310	4	dfrA17, aadA5, sul1, tet(A)	L3b	2015	Asia	China
SAL_PA7720AA	0	No ARG	L3b	1967	Asia	China
SAL_PA7694AA	0	No ARG	L3b	2014	Asia	China
SAL03332	4	dfrA17, aadA5, sul1, tet(A)	L3b	2014	Asia	China
SAL_PA7733AA	0	No ARG	L3b	2013	Asia	China
SAL_PA7973AA	0	No ARG	L3b	1965	Asia	China
