# Supplementary material for: Avian-specific Salmonella transition to endemicity is accompanied by localized resistome and mobilome interaction
Source: eLife. 2025 Mar 4;13:RP101241. doi: 10.7554/eLife.101241 (PMC11879110; doi:10.7554/eLife.101241)
Supplement: Supplementary file 7. [file elife-101241-supp7.xlsx]

## Sheet: Sheet1
Strain_name	Lineage	Isolate Time	Continent	Country	Transposon	Number of transposon	Integron	Number of integron	Plasmid	Number of plasmid	Prophage	Number of prophage
SAL_PA7740AA	L1	1968	Asia	China	No Transposon	0	No Integron	0	IncFII(S)_1	1	PHAGE_Shigel_SfIV_NC_022749(2), PHAGE_Entero_mEp237_NC_019704(3), PHAGE_Phage_Gifsy_2_NC_010393(31), PHAGE_Klebsi_4LV2017_NC_047818(26), PHAGE_Clostr_c_st_NC_007581(2), PHAGE_Salmon_SJ46_NC_031129(3), PHAGE_Escher_500465_2_NC_049343(4)	7
7310	L1	1985	Asia	China	No Transposon	0	No Integron	0	IncFII(S)_1	1	PHAGE_Entero_mEp237_NC_019704(3), PHAGE_Phage_Gifsy_2_NC_010393(31), PHAGE_Salmon_RE_2010_NC_019488(21), PHAGE_Entero_ST104_NC_005841(46), PHAGE_Shigel_SfIV_NC_022749(2), PHAGE_Escher_500465_2_NC_049343(4), PHAGE_Salmon_SJ46_NC_031129(3)	7
MY0186	L1	1985	Asia	China	No Transposon	0	No Integron	0	IncFII(S)_1, ColpVC_1	2	PHAGE_Escher_500465_1_NC_049342(26), PHAGE_Shigel_SfIV_NC_022749(2), PHAGE_Escher_500465_2_NC_049343(4), PHAGE_Entero_mEp237_NC_019704(3), PHAGE_Phage_Gifsy_2_NC_010393(31), PHAGE_Clostr_c_st_NC_007581(2), PHAGE_Salmon_SJ46_NC_031129(3)	7
7904	L1	1985	Asia	China	No Transposon	0	No Integron	0	IncFII(S)_1	1	PHAGE_Phage_Gifsy_2_NC_010393(31), PHAGE_Entero_mEp237_NC_019704(3), PHAGE_Salmon_RE_2010_NC_019488(21), PHAGE_Shigel_SfIV_NC_022749(2), PHAGE_Entero_ST104_NC_005841(48), PHAGE_Escher_500465_2_NC_049343(4), PHAGE_Clostr_c_st_NC_007581(2), PHAGE_Salmon_SJ46_NC_031129(3)	8
SAL03395	L1	2011	Asia	China	No Transposon	0	No Integron	0	IncFII(S)_1, ColpVC_1	2	PHAGE_Phage_Gifsy_2_NC_010393(31), PHAGE_Entero_mEp237_NC_019704(3), PHAGE_Escher_500465_1_NC_049342(26), PHAGE_Shigel_SfIV_NC_022749(2), PHAGE_Entero_ST104_NC_005841(51), PHAGE_Escher_500465_2_NC_049343(4), PHAGE_Clostr_c_st_NC_007581(2), PHAGE_Salmon_SJ46_NC_031129(3)	8
ERS2630790	L1	1973	Asia	China	No Transposon	0	No Integron	0	IncFII(S)_1	1	PHAGE_Phage_Gifsy_2_NC_010393(32), PHAGE_Klebsi_4LV2017_NC_047818(26), PHAGE_Shigel_SfIV_NC_022749(2), PHAGE_Escher_500465_2_NC_049343(4), PHAGE_Salmon_SJ46_NC_031129(3)	5
SAL03394	L1	1995	Asia	China	No Transposon	0	No Integron	0	IncFII(S)_1	1	PHAGE_Entero_mEp237_NC_019704(3), PHAGE_Phage_Gifsy_2_NC_010393(31), PHAGE_Klebsi_4LV2017_NC_047818(26), PHAGE_Shigel_SfIV_NC_022749(2), PHAGE_Entero_ST104_NC_005841(51), PHAGE_Escher_500465_2_NC_049343(4), PHAGE_Clostr_c_st_NC_007581(2), PHAGE_Salmon_SJ46_NC_031129(3)	8
7808	L1	1985	Asia	China	No Transposon	0	No Integron	0	IncFII(S)_1	1	PHAGE_Phage_Gifsy_2_NC_010393(31), PHAGE_Entero_mEp237_NC_019704(3), PHAGE_Salmon_RE_2010_NC_019488(21), PHAGE_Shigel_SfIV_NC_022749(2), PHAGE_Escher_500465_2_NC_049343(4), PHAGE_Clostr_c_st_NC_007581(2), PHAGE_Salmon_SJ46_NC_031129(3)	7
SAL_PA7699AA	L1	2008	Asia	China	No Transposon	0	No Integron	0	IncFII(S)_1	1	PHAGE_Escher_500465_2_NC_049343(4), PHAGE_Klebsi_4LV2017_NC_047818(26), PHAGE_Entero_ST104_NC_005841(49), PHAGE_Phage_Gifsy_2_NC_010393(32), PHAGE_Clostr_c_st_NC_007581(2), PHAGE_Salmon_SJ46_NC_031129(3), PHAGE_Shigel_SfIV_NC_022749(2)	7
6801	L1	1985	Asia	China	No Transposon	0	No Integron	0	IncFII(S)_1	1	PHAGE_Entero_mEp237_NC_019704(3), PHAGE_Phage_Gifsy_2_NC_010393(31), PHAGE_Salmon_RE_2010_NC_019488(21), PHAGE_Escher_500465_2_NC_049343(4), PHAGE_Shigel_SfIV_NC_022749(2), PHAGE_Clostr_c_st_NC_007581(2), PHAGE_Salmon_SJ46_NC_031129(3)	7
SAL_WB8172AA	L2a	2019	not collected	not collected	No Transposon	0	No Integron	0	IncFII(S)_1, ColpVC_1	2	PHAGE_Salmon_SJ46_NC_031129(3), PHAGE_Entero_mEp237_NC_019704(3), PHAGE_Phage_Gifsy_2_NC_010393(29), PHAGE_Escher_500465_1_NC_049342(28), PHAGE_Shigel_SfIV_NC_022749(2), PHAGE_Escher_500465_2_NC_049343(4)	6
SAL_FB6635AA	L2a	2017	South America	Brazil	No Transposon	0	No Integron	0	IncFII(S)_1, ColpVC_1	2	PHAGE_Salmon_SJ46_NC_031129(3), PHAGE_Phage_Gifsy_2_NC_010393(29), PHAGE_Entero_mEp237_NC_019704(3), PHAGE_Escher_500465_2_NC_049343(4), PHAGE_Shigel_SfIV_NC_022749(2), PHAGE_Escher_500465_1_NC_049342(28)	6
SAL_IB1374AA	L2a	2018	Europe	UK	No Transposon	0	No Integron	0	IncFII(S)_1, ColpVC_1	2	PHAGE_Burkho_phiE255_NC_009237(2), PHAGE_Salmon_SJ46_NC_031129(3), PHAGE_Escher_500465_1_NC_049342(27), PHAGE_Shigel_SfIV_NC_022749(2), PHAGE_Escher_500465_2_NC_049343(4), PHAGE_Entero_mEp237_NC_019704(3), PHAGE_Phage_Gifsy_2_NC_010393(29)	7
SAL_WB7906AA	L2a	2019	not collected	not collected	No Transposon	0	No Integron	0	IncFII(S)_1	1	PHAGE_Salmon_SJ46_NC_031129(3), PHAGE_Phage_Gifsy_2_NC_010393(29), PHAGE_Entero_mEp237_NC_019704(3), PHAGE_Escher_500465_1_NC_049342(27), PHAGE_Salmon_ST64T_NC_004348(30), PHAGE_Shigel_SfIV_NC_022749(2), PHAGE_Escher_500465_2_NC_049343(4)	7
GCA_000462995.1	L2a	1983	Asia	China	No Transposon	0	No Integron	0	No Plasmid	0	PHAGE_Escher_500465_2_NC_049343(5), PHAGE_Phage_Gifsy_2_NC_010393(29), PHAGE_Entero_mEp237_NC_019704(4), PHAGE_Salmon_SPN9CC_NC_017985(2)	4
SAL_HB1901AA	L2a	2018	Europe	UK	No Transposon	0	No Integron	0	IncFII(S)_1	1	PHAGE_Escher_500465_2_NC_049343(4), PHAGE_Salmon_SJ46_NC_031129(3), PHAGE_Phage_Gifsy_2_NC_010393(29), PHAGE_Entero_mEp237_NC_019704(3), PHAGE_Escher_500465_1_NC_049342(28), PHAGE_Shigel_SfIV_NC_022749(2)	6
GCA_001448575.1	L2a	2007	Europe	UK	No Transposon	0	No Integron	0	IncFII(S)_1, IncI1_1_Alpha	2	PHAGE_Escher_500465_2_NC_049343(4), PHAGE_Phage_Gifsy_2_NC_010393(29), PHAGE_Entero_mEp237_NC_019704(3), PHAGE_Escher_500465_1_NC_049342(28), PHAGE_Salmon_SJ46_NC_031129(3), PHAGE_Shigel_SfIV_NC_022749(2), PHAGE_Entero_N15_NC_001901(2)	7
SAL_EA5139AA	L2a	1938	not collected	not collected	No Transposon	0	No Integron	0	IncFII(S)_1, Col156_1, ColpVC_1	3	PHAGE_Escher_500465_2_NC_049343(4), PHAGE_Burkho_BcepMu_NC_005882(2), PHAGE_Salmon_SJ46_NC_031129(3), PHAGE_Entero_mEp237_NC_019704(3), PHAGE_Phage_Gifsy_2_NC_010393(29), PHAGE_Escher_500465_1_NC_049342(28), PHAGE_Shigel_SfIV_NC_022749(2)	7
GCA_015024685.1	L2a	2013	Europe	Germany	No Transposon	0	No Integron	0	IncFII(S)_1, ColpVC_1	2	PHAGE_Phage_Gifsy_2_NC_010393(29), PHAGE_Entero_mEp237_NC_019704(3), PHAGE_Burkho_BcepMu_NC_005882(2), PHAGE_Salmon_SJ46_NC_031129(3), PHAGE_Escher_500465_1_NC_049342(27), PHAGE_Shigel_SfIV_NC_022749(2), PHAGE_Escher_500465_2_NC_049343(4)	7
SAL_FB6647AA	L2a	2015	South America	Brazil	No Transposon	0	No Integron	0	IncFII(S)_1, ColpVC_1	2	PHAGE_Clostr_c_st_NC_007581(2), PHAGE_Salmon_SJ46_NC_031129(3), PHAGE_Phage_Gifsy_2_NC_010393(29), PHAGE_Entero_mEp237_NC_019704(3), PHAGE_Shigel_SfIV_NC_022749(2), PHAGE_Escher_500465_2_NC_049343(4), PHAGE_Escher_500465_1_NC_049342(28)	7
SAL_PA7743AA	L2a	1999	South America	Brazil	No Transposon	0	No Integron	0	IncFII(S)_1, ColpVC_1	2	PHAGE_Salmon_SJ46_NC_031129(3), PHAGE_Entero_mEp237_NC_019704(3), PHAGE_Phage_Gifsy_2_NC_010393(29), PHAGE_Escher_500465_2_NC_049343(4), PHAGE_Shigel_SfIV_NC_022749(2), PHAGE_Escher_500465_1_NC_049342(27)	6
SAL_LA6324AA	L2a	1998	North America	USA	No Transposon	0	No Integron	0	IncFII(S)_1, ColpVC_1	2	PHAGE_Clostr_c_st_NC_007581(2), PHAGE_Salmon_SJ46_NC_031129(3), PHAGE_Phage_Gifsy_2_NC_010393(3), PHAGE_Escher_500465_2_NC_049343(4), PHAGE_Escher_500465_1_NC_049342(28), PHAGE_Phage_Gifsy_2_NC_010393(28), PHAGE_Shigel_SfIV_NC_022749(2)	7
SAL_FB6666AA	L2a	2017	South America	Brazil	No Transposon	0	No Integron	0	IncFII(S)_1, ColpVC_1, ColpVC_1	3	PHAGE_Clostr_c_st_NC_007581(2), PHAGE_Salmon_SJ46_NC_031129(3), PHAGE_Escher_500465_2_NC_049343(4), PHAGE_Shigel_SfIV_NC_022749(2), PHAGE_Escher_500465_1_NC_049342(28), PHAGE_Entero_mEp237_NC_019704(3), PHAGE_Phage_Gifsy_2_NC_010393(31)	7
GCA_000330485.2	L2a	2012	North America	USA	No Transposon	0	No Integron	0	IncFII(S)_1	1	PHAGE_Escher_500465_2_NC_049343(4), PHAGE_Phage_Gifsy_2_NC_010393(30), PHAGE_Entero_mEp237_NC_019704(3), PHAGE_Shigel_SfIV_NC_022749(2), PHAGE_Escher_500465_1_NC_049342(28), PHAGE_Salmon_SJ46_NC_031129(3)	6
WS749_S15	L2a	< 1968	not collected	not collected	No Transposon	0	No Integron	0	IncFII(S)_1, ColpVC_1	2	PHAGE_Escher_500465_2_NC_049343(4), PHAGE_Salmon_SJ46_NC_031129(3), PHAGE_Escher_500465_1_NC_049342(25), PHAGE_Phage_Gifsy_2_NC_010393(29)	4
GCA_000521885.1	L2a	2008	South America	Brazil	No Transposon	0	No Integron	0	No Plasmid	0	PHAGE_Escher_500465_2_NC_049343(4), PHAGE_Phage_Gifsy_2_NC_010393(29), PHAGE_Entero_mEp237_NC_019704(3), PHAGE_Shigel_SfIV_NC_022749(2)	4
SRS1039523	L2a	2004	not collected	not collected	No Transposon	0	No Integron	0	IncFII(S)_1, ColpVC_1	2	PHAGE_Phage_Gifsy_2_NC_010393(29), PHAGE_Entero_mEp237_NC_019704(3), PHAGE_Shigel_SfIV_NC_022749(2), PHAGE_Escher_500465_2_NC_049343(4), PHAGE_Escher_500465_1_NC_049342(27), PHAGE_Salmon_SJ46_NC_031129(3)	6
SAL_EA5204AA	L2a	1938	not collected	not collected	No Transposon	0	No Integron	0	IncFII(S)_1, ColpVC_1	2	PHAGE_Shigel_SfIV_NC_022749(2), PHAGE_Phage_Gifsy_2_NC_010393(32), PHAGE_Escher_500465_2_NC_049343(4), PHAGE_Escher_500465_1_NC_049342(28), PHAGE_Burkho_BcepMu_NC_005882(2), PHAGE_Salmon_SJ46_NC_031129(3)	6
WS0750bis_S199	L2a	< 1968	not collected	not collected	No Transposon	0	No Integron	0	IncFII(S)_1, ColpVC_1	2	PHAGE_Shigel_SfIV_NC_022749(2), PHAGE_Escher_500465_2_NC_049343(4), PHAGE_Entero_mEp237_NC_019704(3), PHAGE_Phage_Gifsy_2_NC_010393(29), PHAGE_Burkho_phiE255_NC_009237(2), PHAGE_Salmon_SJ46_NC_031129(3), PHAGE_Escher_500465_1_NC_049342(25)	7
GCA_000486745.1	L2a	2012	North America	Canada	No Transposon	0	No Integron	0	IncFII(S)_1, ColpVC_1	2	PHAGE_Shigel_SfIV_NC_022749(2), PHAGE_Burkho_phiE255_NC_009237(2), PHAGE_Salmon_SJ46_NC_031129(3), PHAGE_Entero_mEp237_NC_019704(3), PHAGE_Phage_Gifsy_2_NC_010393(29), PHAGE_Salmon_RE_2010_NC_019488(21), PHAGE_Escher_500465_2_NC_049343(4)	7
SAL_FB2385AA	L2a	2017	not collected	not collected	No Transposon	0	No Integron	0	IncFII(S)_1, ColpVC_1	2	PHAGE_Clostr_c_st_NC_007581(2), PHAGE_Salmon_SJ46_NC_031129(3), PHAGE_Entero_mEp237_NC_019704(3), PHAGE_Phage_Gifsy_2_NC_010393(29), PHAGE_Escher_500465_1_NC_049342(28), PHAGE_Shigel_SfIV_NC_022749(2), PHAGE_Escher_500465_2_NC_049343(4)	7
SAL_KA3410AA	L2a	1994	Europe	UK	No Transposon	0	No Integron	0	No Plasmid	0	PHAGE_Escher_500465_2_NC_049343(5), PHAGE_Phage_Gifsy_2_NC_010393(33), PHAGE_Entero_mEp237_NC_019704(4)	3
WS0753_S48	L2a	< 1968	Europe	UK	No Transposon	0	No Integron	0	ColpVC_1, IncFII(S)_1	2	PHAGE_Salmon_SJ46_NC_031129(3), PHAGE_Escher_500465_1_NC_049342(40), PHAGE_Escher_500465_2_NC_049343(4), PHAGE_Phage_Gifsy_2_NC_010393(18)	4
ERS2630796	L2a	2000	South America	Brazil	No Transposon	0	No Integron	0	IncFII(S)_1, ColpVC_1	2	PHAGE_Phage_Gifsy_2_NC_010393(29), PHAGE_Entero_mEp237_NC_019704(3), PHAGE_Escher_500465_1_NC_049342(28), PHAGE_Shigel_SfIV_NC_022749(2), PHAGE_Escher_500465_2_NC_049343(4), PHAGE_Burkho_BcepMu_NC_005882(2), PHAGE_Salmon_SJ46_NC_031129(3)	7
SAL_EB9539AA	L2a	2018	not collected	not collected	No Transposon	0	No Integron	0	IncFII(S)_1, ColpVC_1	2	PHAGE_Burkho_BcepMu_NC_005882(2), PHAGE_Salmon_SJ46_NC_031129(3), PHAGE_Phage_Gifsy_2_NC_010393(29), PHAGE_Entero_mEp237_NC_019704(3), PHAGE_Escher_500465_2_NC_049343(4), PHAGE_Shigel_SfIV_NC_022749(2), PHAGE_Salmon_RE_2010_NC_019488(21)	7
WS747_S13	L2a	< 1967	not collected	not collected	No Transposon	0	No Integron	0	IncFII(S)_1	1	PHAGE_Phage_Gifsy_2_NC_010393(29), PHAGE_Entero_mEp237_NC_019704(3), PHAGE_Shigel_SfIV_NC_022749(2), PHAGE_Escher_500465_2_NC_049343(4), PHAGE_Escher_500465_1_NC_049342(27), PHAGE_Salmon_ST64T_NC_004348(27), PHAGE_Clostr_c_st_NC_007581(2), PHAGE_Salmon_SJ46_NC_031129(3)	8
SAL_PA7982AA	L2a	2001	South America	Brazil	No Transposon	0	No Integron	0	IncFII(S)_1, ColpVC_1	2	PHAGE_Shigel_SfIV_NC_022749(2), PHAGE_Burkho_BcepMu_NC_005882(2), PHAGE_Salmon_SJ46_NC_031129(3), PHAGE_Phage_Gifsy_2_NC_010393(29), PHAGE_Entero_mEp237_NC_019704(3), PHAGE_Escher_500465_2_NC_049343(4), PHAGE_Escher_500465_1_NC_049342(27)	7
SAL_EA4800AA	L2a	1999	not collected	not collected	No Transposon	0	No Integron	0	IncFII(S)_1, ColpVC_1	2	PHAGE_Escher_500465_2_NC_049343(4), PHAGE_Phage_Gifsy_2_NC_010393(31), PHAGE_Entero_mEp237_NC_019704(3), PHAGE_Clostr_c_st_NC_007581(2), PHAGE_Salmon_SJ46_NC_031129(3), PHAGE_Shigel_SfIV_NC_022749(2), PHAGE_Escher_500465_1_NC_049342(28)	7
SAL_FA6266AA	L2a	1938	not collected	not collected	No Transposon	0	No Integron	0	IncFII(S)_1	1	PHAGE_Shigel_SfIV_NC_022749(2), PHAGE_Escher_500465_1_NC_049342(28), PHAGE_Phage_Gifsy_2_NC_010393(29), PHAGE_Entero_mEp237_NC_019704(3), PHAGE_Burkho_BcepMu_NC_005882(2), PHAGE_Salmon_SJ46_NC_031129(3), PHAGE_Escher_500465_2_NC_049343(4)	7
SAL_IC1631AA	L2a	2004	Europe	Germany	No Transposon	0	No Integron	0	IncFII(S)_1, ColpVC_1	2	PHAGE_Salmon_SJ46_NC_031129(3), PHAGE_Phage_Gifsy_2_NC_010393(29), PHAGE_Entero_mEp237_NC_019704(3), PHAGE_Shigel_SfIV_NC_022749(2), PHAGE_Escher_500465_2_NC_049343(4)	5
SAL_PA7731AA	L2a	1985	Europe	UK	No Transposon	0	No Integron	0	IncFII(S)_1, ColpVC_1	2	PHAGE_Escher_500465_1_NC_049342(27), PHAGE_Escher_500465_2_NC_049343(4), PHAGE_Salmon_SJ46_NC_031129(3), PHAGE_Phage_Gifsy_2_NC_010393(29), PHAGE_Entero_mEp237_NC_019704(3), PHAGE_Shigel_SfIV_NC_022749(2)	6
SAL_PA7981AA	L2a	1986	Europe	UK	No Transposon	0	No Integron	0	IncFII(S)_1, ColpVC_1	2	PHAGE_Escher_500465_2_NC_049343(4), PHAGE_Escher_500465_1_NC_049342(27), PHAGE_Shigel_SfIV_NC_022749(2), PHAGE_Entero_mEp237_NC_019704(3), PHAGE_Phage_Gifsy_2_NC_010393(29), PHAGE_Salmon_SJ46_NC_031129(3)	6
SAL_BB3471AA	L2a	2014	South America	Brazil	No Transposon	0	No Integron	0	IncFII(S)_1, ColpVC_1	2	PHAGE_Salmon_SJ46_NC_031129(3), PHAGE_Entero_mEp237_NC_019704(3), PHAGE_Phage_Gifsy_2_NC_010393(29), PHAGE_Shigel_SfIV_NC_022749(2), PHAGE_Escher_500465_2_NC_049343(4), PHAGE_Escher_500465_1_NC_049342(27)	6
SAL_LA5175AA	L2a	2004	North America	USA	No Transposon	0	No Integron	0	IncFII(S)_1, ColpVC_1	2	PHAGE_Escher_500465_1_NC_049342(29), PHAGE_Phage_Gifsy_2_NC_010393(29), PHAGE_Entero_mEp237_NC_019704(3), PHAGE_Salmon_SJ46_NC_031129(3), PHAGE_Escher_500465_2_NC_049343(4), PHAGE_Shigel_SfIV_NC_022749(2)	6
SAL_EA4799AA	L2a	2011	North America	USA	No Transposon	0	No Integron	0	IncFII(S)_1, ColpVC_1	2	PHAGE_Escher_500465_2_NC_049343(4), PHAGE_Salmon_RE_2010_NC_019488(21), PHAGE_Phage_Gifsy_2_NC_010393(29), PHAGE_Entero_mEp237_NC_019704(3), PHAGE_Salmon_SJ46_NC_031129(3), PHAGE_Shigel_SfIV_NC_022749(2)	6
GCA_000484295.1	L2a	1990	not collected	not collected	No Transposon	0	No Integron	0	ColpVC_1, IncFII(S)_1	2	PHAGE_Salmon_SJ46_NC_031129(3), PHAGE_Escher_500465_2_NC_049343(4), PHAGE_Escher_500465_1_NC_049342(28), PHAGE_Shigel_SfIV_NC_022749(2), PHAGE_Entero_mEp237_NC_019704(3), PHAGE_Phage_Gifsy_2_NC_010393(31)	6
SAL_PA7972AA	L2a	1986	Europe	UK	No Transposon	0	No Integron	0	IncFII(S)_1, ColpVC_1	2	PHAGE_Salmon_SJ46_NC_031129(3), PHAGE_Escher_500465_2_NC_049343(4), PHAGE_Shigel_SfIV_NC_022749(2), PHAGE_Escher_500465_1_NC_049342(27), PHAGE_Phage_Gifsy_2_NC_010393(29)	5
SAL_PA7969AA	L2a	1993	Europe	UK	No Transposon	0	No Integron	0	IncFII(S)_1	1	PHAGE_Shigel_SfIV_NC_022749(2), PHAGE_Escher_500465_2_NC_049343(4), PHAGE_Salmon_SJ46_NC_031129(3), PHAGE_Phage_Gifsy_2_NC_010393(30), PHAGE_Escher_500465_1_NC_049342(27)	5
MY0335	L2a	1970	Europe	UK	No Transposon	0	No Integron	0	IncFII(S)_1, ColpVC_1	2	PHAGE_Phage_Gifsy_2_NC_010393(29), PHAGE_Entero_mEp237_NC_019704(3), PHAGE_Escher_500465_1_NC_049342(28), PHAGE_Shigel_SfIV_NC_022749(2), PHAGE_Escher_500465_2_NC_049343(4), PHAGE_Clostr_c_st_NC_007581(2), PHAGE_Salmon_SJ46_NC_031129(3)	7
WS0754_S49	L2a	< 1968	not collected	not collected	No Transposon	0	No Integron	0	IncFII(S)_1	1	PHAGE_Clostr_c_st_NC_007581(2), PHAGE_Salmon_SJ46_NC_031129(3), PHAGE_Escher_500465_1_NC_049342(26), PHAGE_Escher_500465_2_NC_049343(4), PHAGE_Phage_Gifsy_2_NC_010393(21)	5
WS755_S18	L2a	< 1968	not collected	not collected	No Transposon	0	No Integron	0	IncFII(S)_1, ColpVC_1	2	PHAGE_Phage_Gifsy_2_NC_010393(29), PHAGE_Entero_mEp237_NC_019704(3), PHAGE_Shigel_SfIV_NC_022749(2), PHAGE_Escher_500465_2_NC_049343(4), PHAGE_Clostr_c_st_NC_007581(2), PHAGE_Salmon_SJ46_NC_031129(3), PHAGE_Salmon_RE_2010_NC_019488(21)	7
MY0188	L2a	1984	Asia	China	No Transposon	0	No Integron	0	ColpVC_1	1	PHAGE_Shigel_SfIV_NC_022749(2), PHAGE_Escher_500465_1_NC_049342(28), PHAGE_Entero_mEp237_NC_019704(3), PHAGE_Phage_Gifsy_2_NC_010393(29), PHAGE_Escher_500465_2_NC_049343(4)	5
SAL_PA7979AA	L2a	1966	South America	Brazil	No Transposon	0	No Integron	0	IncFII(S)_1, ColpVC_1	2	PHAGE_Salmon_SJ46_NC_031129(3), PHAGE_Phage_Gifsy_2_NC_010393(29), PHAGE_Entero_mEp237_NC_019704(3), PHAGE_Shigel_SfIV_NC_022749(2), PHAGE_Escher_500465_2_NC_049343(4), PHAGE_Escher_500465_1_NC_049342(27)	6
SAL03405	L2a	2018	Asia	China	No Transposon	0	No Integron	0	IncFII(S)_1, ColpVC_1	2	PHAGE_Escher_500465_1_NC_049342(27), PHAGE_Phage_Gifsy_2_NC_010393(29), PHAGE_Entero_mEp237_NC_019704(3), PHAGE_Shigel_SfIV_NC_022749(2), PHAGE_Escher_500465_2_NC_049343(4), PHAGE_Clostr_c_st_NC_007581(2), PHAGE_Salmon_SJ46_NC_031129(3)	7
MY0332	L2a	1939	Europe	Denmark	No Transposon	0	No Integron	0	IncFII(S)_1, ColpVC_1	2	PHAGE_Phage_Gifsy_2_NC_010393(31), PHAGE_Entero_mEp237_NC_019704(3), PHAGE_Escher_500465_1_NC_049342(27), PHAGE_Shigel_SfIV_NC_022749(2), PHAGE_Escher_500465_2_NC_049343(4), PHAGE_Salmon_SJ46_NC_031129(3)	6
SAL_PA7980AA	L2b	1949	Europe	Denmark	No Transposon	0	No Integron	0	IncFII(S)_1, ColpVC_1	2	PHAGE_Shigel_SfIV_NC_022749(2), PHAGE_Escher_500465_2_NC_049343(4), PHAGE_Salmon_SJ46_NC_031129(3), PHAGE_Phage_Gifsy_2_NC_010393(32)	4
SAL03290	L2b	2015	Asia	China	Tn801	1	No Integron	0	IncFII(S)_1, IncX1_1, ColpVC_1	3	PHAGE_Phage_Gifsy_2_NC_010393(31), PHAGE_Entero_mEp237_NC_019704(4), PHAGE_Shigel_SfIV_NC_022749(2), PHAGE_Escher_500465_2_NC_049343(4), PHAGE_Pseudo_PaMx28_NC_028931(1), PHAGE_Salmon_SJ46_NC_031129(3), PHAGE_Salmon_SJ46_NC_031129(6)	7
SAL00722	L2b	2015	Asia	China	No Transposon	0	No Integron	0	IncFII(S)_1, ColpVC_1	2	PHAGE_Escher_500465_1_NC_049342(25), PHAGE_Shigel_SfIV_NC_022749(2), PHAGE_Escher_500465_2_NC_049343(4), PHAGE_Phage_Gifsy_2_NC_010393(29), PHAGE_Entero_mEp237_NC_019704(3), PHAGE_Entero_ST104_NC_005841(49), PHAGE_Salmon_SJ46_NC_031129(3), PHAGE_Escher_RCS47_NC_042128(1), PHAGE_Salmon_Fels_1_NC_010391(5)	9
SAL_CB8582AA	L2b	2016	Europe	UK	No Transposon	0	No Integron	0	IncFII(S)_1, ColpVC_1	2	PHAGE_Phage_Gifsy_2_NC_010393(31), PHAGE_Entero_mEp237_NC_019704(3), PHAGE_Salmon_SJ46_NC_031129(3), PHAGE_Shigel_SfIV_NC_022749(2), PHAGE_Escher_500465_2_NC_049343(4)	5
M36	L2b	2022	Asia	China	No Transposon	0	No Integron	0	IncFII(S)_1, ColpVC_1	2	PHAGE_Phage_Gifsy_2_NC_010393(31), PHAGE_Entero_mEp237_NC_019704(3), PHAGE_Shigel_SfIV_NC_022749(2), PHAGE_Entero_ST104_NC_005841(51), PHAGE_Escher_500465_2_NC_049343(4), PHAGE_Mycoba_Squirty_NC_026588(1), PHAGE_Salmon_SJ46_NC_031129(3)	7
X17	L2b	2022	Asia	China	No Transposon	0	No Integron	0	IncFII(S)_1, ColpVC_1	2	PHAGE_Phage_Gifsy_2_NC_010393(32), PHAGE_Shigel_SfIV_NC_022749(2), PHAGE_Entero_ST104_NC_005841(51), PHAGE_Escher_500465_2_NC_049343(4), PHAGE_Salmon_SJ46_NC_031129(3)	5
M244	L2b	2023	Asia	China	No Transposon	0	No Integron	0	IncFII(S)_1, ColpVC_1	2	PHAGE_Phage_Gifsy_2_NC_010393(31), PHAGE_Entero_mEp237_NC_019704(3), PHAGE_Escher_500465_1_NC_049342(26), PHAGE_Entero_ST104_NC_005841(47), PHAGE_Shigel_SfIV_NC_022749(2), PHAGE_Escher_500465_2_NC_049343(4), PHAGE_Burkho_BcepMu_NC_005882(1), PHAGE_Salmon_SJ46_NC_031129(3)	8
SAL00730	L2b	2015	Asia	China	No Transposon	0	No Integron	0	IncFII(S)_1, ColpVC_1	2	PHAGE_Salmon_Fels_1_NC_010391(5), PHAGE_Escher_500465_1_NC_049342(25), PHAGE_Entero_ST104_NC_005841(47), PHAGE_Escher_500465_2_NC_049343(4), PHAGE_Clostr_phiCD211_NC_029048(1), PHAGE_Salmon_SJ46_NC_031129(3), PHAGE_Phage_Gifsy_2_NC_010393(31)	7
SAL02669	L2b	2011	Asia	China	Tn801	1	No Integron	0	IncFII(S)_1, IncX1_1, ColpVC_1	3	PHAGE_Phage_Gifsy_2_NC_010393(31), PHAGE_Entero_mEp237_NC_019704(3), PHAGE_Shigel_SfIV_NC_022749(2), PHAGE_Escher_500465_2_NC_049343(4), PHAGE_Salmon_SJ46_NC_031129(3), PHAGE_Salmon_SJ46_NC_031129(6)	6
M183	L2b	2022	Asia	China	No Transposon	0	No Integron	0	IncFII(S)_1, ColpVC_1	2	PHAGE_Phage_Gifsy_2_NC_010393(32), PHAGE_Klebsi_4LV2017_NC_047818(19), PHAGE_Entero_ST104_NC_005841(47), PHAGE_Shigel_SfIV_NC_022749(2), PHAGE_Escher_500465_2_NC_049343(4), PHAGE_Escher_RCS47_NC_042128(3)	6
X129	L2b	2022	Asia	China	No Transposon	0	No Integron	0	IncFII(S)_1, ColpVC_1	2	PHAGE_Phage_Gifsy_2_NC_010393(32), PHAGE_Klebsi_4LV2017_NC_047818(25), PHAGE_Entero_ST104_NC_005841(47), PHAGE_Shigel_SfIV_NC_022749(2), PHAGE_Escher_500465_2_NC_049343(4), PHAGE_Salmon_SJ46_NC_031129(3)	6
SAL04025	L2b	2017	Asia	China	Tn801	1	No Integron	0	IncFII(S)_1, IncX1_1, ColpVC_1	3	PHAGE_Phage_Gifsy_2_NC_010393(31), PHAGE_Entero_mEp237_NC_019704(3), PHAGE_Shigel_SfIV_NC_022749(2), PHAGE_Escher_500465_2_NC_049343(4), PHAGE_Salmon_SJ46_NC_031129(3), PHAGE_Salmon_SJ46_NC_031129(6)	6
M262	L2b	2023	Asia	China	No Transposon	0	No Integron	0	IncFII(S)_1, ColpVC_1	2	PHAGE_Phage_Gifsy_2_NC_010393(31), PHAGE_Entero_mEp237_NC_019704(3), PHAGE_Entero_ST104_NC_005841(47), PHAGE_Shigel_SfIV_NC_022749(2), PHAGE_Escher_500465_2_NC_049343(4), PHAGE_Salmon_SEN4_NC_029015(1), PHAGE_Salmon_SJ46_NC_031129(3)	7
X186-2	L2b	2022	Asia	China	No Transposon	0	No Integron	0	IncFII(S)_1, ColpVC_1	2	PHAGE_Phage_Gifsy_2_NC_010393(31), PHAGE_Entero_mEp237_NC_019704(3), PHAGE_Escher_500465_1_NC_049342(26), PHAGE_Shigel_SfIV_NC_022749(2), PHAGE_Entero_ST104_NC_005841(51), PHAGE_Escher_500465_2_NC_049343(4), PHAGE_Salmon_SEN34_NC_028699(1), PHAGE_Salmon_SJ46_NC_031129(3)	8
SAL03436	L2b	2012	Asia	China	Tn801	1	No Integron	0	IncFII(S)_1, IncX1_1, ColpVC_1	3	PHAGE_Phage_Gifsy_2_NC_010393(31), PHAGE_Entero_mEp237_NC_019704(3), PHAGE_Shigel_SfIV_NC_022749(2), PHAGE_Escher_500465_2_NC_049343(4), PHAGE_Salmon_SJ46_NC_031129(3), PHAGE_Salmon_SJ46_NC_031129(6)	6
X206	L2b	2022	Asia	China	No Transposon	0	No Integron	0	IncFII(S)_1, ColpVC_1	2	PHAGE_Phage_Gifsy_2_NC_010393(31), PHAGE_Entero_mEp237_NC_019704(3), PHAGE_Shigel_SfIV_NC_022749(2), PHAGE_Entero_ST104_NC_005841(51), PHAGE_Escher_500465_2_NC_049343(4), PHAGE_Salmon_SJ46_NC_031129(3)	6
X159	L2b	2022	Asia	China	No Transposon	0	No Integron	0	IncFII(S)_1, ColpVC_1	2	PHAGE_Phage_Gifsy_2_NC_010393(31), PHAGE_Entero_mEp237_NC_019704(3), PHAGE_Klebsi_4LV2017_NC_047818(25), PHAGE_Entero_ST104_NC_005841(47), PHAGE_Shigel_SfIV_NC_022749(2), PHAGE_Escher_500465_2_NC_049343(4), PHAGE_Ralsto_Rs551_NC_047765(1), PHAGE_Salmon_SJ46_NC_031129(3)	8
SAL04094	L2b	2019	Asia	China	Tn801	1	No Integron	0	IncFII(S)_1, IncX1_1, ColpVC_1	3	PHAGE_Phage_Gifsy_2_NC_010393(31), PHAGE_Entero_mEp237_NC_019704(3), PHAGE_Shigel_SfIV_NC_022749(2), PHAGE_Escher_500465_2_NC_049343(4), PHAGE_Phage_Gifsy_2_NC_010393(1), PHAGE_Salmon_SJ46_NC_031129(3), PHAGE_Salmon_SJ46_NC_031129(6)	7
XXB1725	L2b	2017	Asia	China	Tn801	1	No Integron	0	IncFII(S)_1, ColpVC_1	2	PHAGE_Phage_Gifsy_2_NC_010393(32), PHAGE_Salmon_SJ46_NC_031129(6), PHAGE_Shigel_SfIV_NC_022749(2), PHAGE_Escher_500465_2_NC_049343(4)	4
GCA_900067255.1	L2b	1987	Europe	UK	No Transposon	0	No Integron	0	IncFII(S)_1, ColpVC_1	2	PHAGE_Phage_Gifsy_2_NC_010393(31), PHAGE_Entero_mEp237_NC_019704(3), PHAGE_Shigel_SfIV_NC_022749(2), PHAGE_Escher_500465_2_NC_049343(4), PHAGE_Salmon_SJ46_NC_031129(3)	5
M34	L2b	2022	Asia	China	No Transposon	0	No Integron	0	IncFII(S)_1, ColpVC_1	2	PHAGE_Phage_Gifsy_2_NC_010393(31), PHAGE_Entero_mEp237_NC_019704(3), PHAGE_Shigel_SfIV_NC_022749(2), PHAGE_Entero_ST104_NC_005841(51), PHAGE_Escher_500465_2_NC_049343(4), PHAGE_Mycoba_Squirty_NC_026588(1), PHAGE_Salmon_SJ46_NC_031129(3)	7
SAL02668	L2b	2011	Asia	China	Tn801	1	No Integron	0	IncFII(S)_1, IncX1_1, ColpVC_1	3	PHAGE_Phage_Gifsy_2_NC_010393(32), PHAGE_Shigel_SfIV_NC_022749(2), PHAGE_Escher_500465_2_NC_049343(4), PHAGE_Pseudo_vB_PaeS_PM105_NC_028667(1), PHAGE_Salmon_SJ46_NC_031129(3), PHAGE_Salmon_SJ46_NC_031129(6)	6
SAL00729	L2b	2015	Asia	China	No Transposon	0	No Integron	0	IncFII(S)_1, ColpVC_1	2	PHAGE_Escher_500465_1_NC_049342(26), PHAGE_Phage_Gifsy_2_NC_010393(31), PHAGE_Entero_mEp237_NC_019704(3), PHAGE_Shigel_SfIV_NC_022749(2), PHAGE_Entero_ST104_NC_005841(51), PHAGE_Escher_500465_2_NC_049343(4), PHAGE_Salmon_SEN4_NC_029015(1), PHAGE_Salmon_SJ46_NC_031129(3)	8
M9-2	L2b	2022	Asia	China	No Transposon	0	No Integron	0	IncFII(S)_1, ColpVC_1	2	PHAGE_Phage_Gifsy_2_NC_010393(29), PHAGE_Entero_mEp237_NC_019704(3), PHAGE_Klebsi_4LV2017_NC_047818(25), PHAGE_Entero_ST104_NC_005841(47), PHAGE_Shigel_SfIV_NC_022749(2), PHAGE_Escher_500465_2_NC_049343(4), PHAGE_Geobac_E3_NC_029073(1), PHAGE_Salmon_SJ46_NC_031129(3)	8
M284	L2b	2023	Asia	China	No Transposon	0	No Integron	0	IncFII(S)_1, ColpVC_1	2	PHAGE_Phage_Gifsy_2_NC_010393(30), PHAGE_Escher_500465_1_NC_049342(25), PHAGE_Entero_ST104_NC_005841(47), PHAGE_Shigel_SfIV_NC_022749(2), PHAGE_Escher_500465_2_NC_049343(4), PHAGE_Salmon_SJ46_NC_031129(3)	6
SAL00715	L2b	2014	Asia	China	No Transposon	0	No Integron	0	IncFII(S)_1, ColpVC_1	2	PHAGE_Shigel_SfIV_NC_022749(2), PHAGE_Phage_Gifsy_2_NC_010393(32), PHAGE_Escher_500465_2_NC_049343(4), PHAGE_Entero_ST104_NC_005841(49), PHAGE_Phage_Gifsy_2_NC_010393(1), PHAGE_Salmon_SJ46_NC_031129(3)	6
SAL_PA7978AA	L2b	1953	Europe	UK	No Transposon	0	No Integron	0	IncFII(S)_1, ColpVC_1	2	PHAGE_Shigel_SfIV_NC_022749(2), PHAGE_Escher_500465_2_NC_049343(4), PHAGE_Phage_Gifsy_2_NC_010393(31), PHAGE_Entero_mEp237_NC_019704(3), PHAGE_Salmon_SJ46_NC_031129(3)	5
X124	L2b	2022	Asia	China	No Transposon	0	No Integron	0	IncFII(S)_1, ColpVC_1	2	PHAGE_Phage_Gifsy_2_NC_010393(31), PHAGE_Entero_mEp237_NC_019704(3), PHAGE_Entero_ST104_NC_005841(47), PHAGE_Shigel_SfIV_NC_022749(2), PHAGE_Escher_500465_2_NC_049343(4), PHAGE_Burkho_BcepMu_NC_005882(1), PHAGE_Salmon_SJ46_NC_031129(3)	7
M175	L2b	2022	Asia	China	No Transposon	0	No Integron	0	IncFII(S)_1, ColpVC_1	2	PHAGE_Phage_Gifsy_2_NC_010393(32), PHAGE_Escher_500465_1_NC_049342(25), PHAGE_Shigel_SfIV_NC_022749(2), PHAGE_Entero_ST104_NC_005841(51), PHAGE_Escher_500465_2_NC_049343(4), PHAGE_Salmon_SJ46_NC_031129(3)	6
X166	L2b	2022	Asia	China	No Transposon	0	No Integron	0	IncFII(S)_1, ColpVC_1	2	PHAGE_Phage_Gifsy_2_NC_010393(30), PHAGE_Escher_500465_1_NC_049342(25), PHAGE_Shigel_SfIV_NC_022749(2), PHAGE_Entero_ST104_NC_005841(51), PHAGE_Escher_500465_2_NC_049343(4), PHAGE_Escher_RCS47_NC_042128(3)	6
M220	L2b	2023	Asia	China	No Transposon	0	No Integron	0	IncFII(S)_1, ColpVC_1	2	PHAGE_Phage_Gifsy_2_NC_010393(31), PHAGE_Entero_mEp237_NC_019704(3), PHAGE_Klebsi_4LV2017_NC_047818(25), PHAGE_Shigel_SfIV_NC_022749(2), PHAGE_Escher_500465_2_NC_049343(4), PHAGE_Ralsto_NP_2014_NC_023586(1), PHAGE_Salmon_SJ46_NC_031129(3)	7
X38	L2b	2022	Asia	China	No Transposon	0	No Integron	0	IncFII(S)_1, ColpVC_1	2	PHAGE_Phage_Gifsy_2_NC_010393(32), PHAGE_Escher_500465_1_NC_049342(26), PHAGE_Entero_ST104_NC_005841(47), PHAGE_Shigel_SfIV_NC_022749(2), PHAGE_Escher_500465_2_NC_049343(4), PHAGE_Salmon_SJ46_NC_031129(3)	6
SAL03506	L2b	2019	Asia	China	Tn6292	1	No Integron	0	IncFII(S)_1, ColpVC_1	2	PHAGE_Phage_Gifsy_2_NC_010393(31), PHAGE_Entero_mEp237_NC_019704(3), PHAGE_Escher_500465_1_NC_049342(26), PHAGE_Shigel_SfIV_NC_022749(2), PHAGE_Entero_ST104_NC_005841(51), PHAGE_Escher_500465_2_NC_049343(4), PHAGE_Salmon_SEN34_NC_028699(1), PHAGE_Salmon_SJ46_NC_031129(3)	8
SAL_PA7704AA	L2b	2013	Asia	China	No Transposon	0	No Integron	0	IncFII(S)_1, ColpVC_1	2	PHAGE_Phage_Gifsy_2_NC_010393(32), PHAGE_Escher_500465_2_NC_049343(4), PHAGE_Shigel_SfIV_NC_022749(2), PHAGE_Salmon_SJ46_NC_031129(3), PHAGE_Pseudo_vB_PaeS_PM105_NC_028667(1), PHAGE_Entero_ST104_NC_005841(49), PHAGE_Escher_500465_1_NC_049342(26)	7
M292	L2b	2023	Asia	China	No Transposon	0	No Integron	0	IncFII(S)_1, ColpVC_1	2	PHAGE_Phage_Gifsy_2_NC_010393(31), PHAGE_Entero_mEp237_NC_019704(3), PHAGE_Escher_500465_1_NC_049342(26), PHAGE_Shigel_SfIV_NC_022749(2), PHAGE_Entero_ST104_NC_005841(51), PHAGE_Escher_500465_2_NC_049343(4), PHAGE_Pseudo_PaMx28_NC_028931(1), PHAGE_Salmon_SJ46_NC_031129(3)	8
M277	L2b	2023	Asia	China	No Transposon	0	No Integron	0	IncFII(S)_1, ColpVC_1	2	PHAGE_Phage_Gifsy_2_NC_010393(29), PHAGE_Entero_mEp237_NC_019704(3), PHAGE_Escher_500465_1_NC_049342(26), PHAGE_Shigel_SfIV_NC_022749(2), PHAGE_Entero_ST104_NC_005841(51), PHAGE_Escher_500465_2_NC_049343(4), PHAGE_Burkho_phiE255_NC_009237(1), PHAGE_Salmon_SJ46_NC_031129(3)	8
SAL_PA7756AA	L2b	1971	Asia	China	No Transposon	0	No Integron	0	IncFII(S)_1, ColpVC_1	2	PHAGE_Phage_Gifsy_2_NC_010393(32), PHAGE_Salmon_SJ46_NC_031129(3), PHAGE_Escher_500465_2_NC_049343(4), PHAGE_Entero_ST104_NC_005841(49), PHAGE_Shigel_SfIV_NC_022749(2)	5
SAL04026	L2b	2017	Asia	China	Tn801	1	No Integron	0	IncFII(S)_1, IncX1_1, ColpVC_1	3	PHAGE_Phage_Gifsy_2_NC_010393(31), PHAGE_Entero_mEp237_NC_019704(3), PHAGE_Shigel_SfIV_NC_022749(2), PHAGE_Escher_500465_2_NC_049343(4), PHAGE_Salmon_SJ46_NC_031129(3), PHAGE_Salmon_SJ46_NC_031129(6)	6
M127	L2b	2022	Asia	China	No Transposon	0	No Integron	0	IncFII(S)_1, ColpVC_1	2	PHAGE_Phage_Gifsy_2_NC_010393(32), PHAGE_Escher_500465_1_NC_049342(26), PHAGE_Entero_ST104_NC_005841(47), PHAGE_Shigel_SfIV_NC_022749(2), PHAGE_Escher_500465_2_NC_049343(4), PHAGE_Salmon_SJ46_NC_031129(3)	6
M285	L2b	2023	Asia	China	No Transposon	0	No Integron	0	IncFII(S)_1, ColpVC_1	2	PHAGE_Phage_Gifsy_2_NC_010393(32), PHAGE_Escher_500465_1_NC_049342(25), PHAGE_Shigel_SfIV_NC_022749(2), PHAGE_Escher_500465_2_NC_049343(4), PHAGE_Salmon_SJ46_NC_031129(3)	5
X2	L2b	2022	Asia	China	No Transposon	0	No Integron	0	IncFII(S)_1, ColpVC_1	2	PHAGE_Phage_Gifsy_2_NC_010393(31), PHAGE_Entero_mEp237_NC_019704(3), PHAGE_Escher_500465_1_NC_049342(26), PHAGE_Shigel_SfIV_NC_022749(2), PHAGE_Entero_ST104_NC_005841(51), PHAGE_Escher_500465_2_NC_049343(4), PHAGE_Salmon_SJ46_NC_031129(3)	7
M198	L2b	2023	Asia	China	No Transposon	0	No Integron	0	IncFII(S)_1, ColpVC_1	2	PHAGE_Phage_Gifsy_2_NC_010393(32), PHAGE_Escher_500465_1_NC_049342(25), PHAGE_Shigel_SfIV_NC_022749(2), PHAGE_Entero_ST104_NC_005841(51), PHAGE_Escher_500465_2_NC_049343(4), PHAGE_Salmon_SJ46_NC_031129(3)	6
MY0123	L2b	1939	Europe	Denmark	No Transposon	0	No Integron	0	IncFII(S)_1, ColpVC_1	2	PHAGE_Phage_Gifsy_2_NC_010393(5), PHAGE_Shigel_SfIV_NC_022749(2), PHAGE_Escher_500465_2_NC_049343(4), PHAGE_Salmon_SJ46_NC_031129(3), PHAGE_Phage_Gifsy_2_NC_010393(29)	5
E404	L2b	2023	Asia	China	Tn801	1	No Integron	0	IncFII(S)_1, IncX1_1, ColpVC_1	3	PHAGE_Phage_Gifsy_2_NC_010393(32), PHAGE_Shigel_SfIV_NC_022749(2), PHAGE_Escher_500465_2_NC_049343(4), PHAGE_Salmon_SJ46_NC_031129(3), PHAGE_Salmon_SJ46_NC_031129(6)	5
M312	L2b	2023	Asia	China	No Transposon	0	No Integron	0	IncFII(S)_1, ColpVC_1	2	PHAGE_Phage_Gifsy_2_NC_010393(32), PHAGE_Klebsi_4LV2017_NC_047818(25), PHAGE_Entero_ST104_NC_005841(47), PHAGE_Shigel_SfIV_NC_022749(2), PHAGE_Escher_500465_2_NC_049343(4), PHAGE_Salmon_SJ46_NC_031129(3)	6
SAL04091	L2b	2019	Asia	China	Tn801	1	No Integron	0	IncFII(S)_1, IncX1_1, ColpVC_1	3	PHAGE_Phage_Gifsy_2_NC_010393(31), PHAGE_Entero_mEp237_NC_019704(3), PHAGE_Shigel_SfIV_NC_022749(2), PHAGE_Escher_500465_2_NC_049343(4), PHAGE_Salmon_SJ46_NC_031129(3), PHAGE_Salmon_SJ46_NC_031129(6)	6
SAL03308	L2b	2015	Asia	China	Tn801	1	No Integron	0	IncFII(S)_1, IncX1_1, ColpVC_1	3	PHAGE_Phage_Gifsy_2_NC_010393(31), PHAGE_Entero_mEp237_NC_019704(3), PHAGE_Shigel_SfIV_NC_022749(2), PHAGE_Escher_500465_2_NC_049343(4), PHAGE_Pseudo_vB_PaeS_PM105_NC_028667(1), PHAGE_Salmon_SJ46_NC_031129(3), PHAGE_Salmon_SJ46_NC_031129(6)	7
X6	L2b	2022	Asia	China	No Transposon	0	No Integron	0	IncFII(S)_1, ColpVC_1	2	PHAGE_Phage_Gifsy_2_NC_010393(31), PHAGE_Entero_mEp237_NC_019704(3), PHAGE_Escher_500465_1_NC_049342(26), PHAGE_Shigel_SfIV_NC_022749(2), PHAGE_Entero_ST104_NC_005841(51), PHAGE_Escher_500465_2_NC_049343(4), PHAGE_Burkho_phiE255_NC_009237(1), PHAGE_Salmon_SJ46_NC_031129(3)	8
M9-4	L2b	2022	Asia	China	No Transposon	0	No Integron	0	IncFII(S)_1, ColpVC_1	2	PHAGE_Phage_Gifsy_2_NC_010393(29), PHAGE_Entero_mEp237_NC_019704(3), PHAGE_Escher_500465_1_NC_049342(25), PHAGE_Shigel_SfIV_NC_022749(2), PHAGE_Entero_ST104_NC_005841(51), PHAGE_Escher_500465_2_NC_049343(4), PHAGE_Salmon_SJ46_NC_031129(3)	7
M241	L2b	2023	Asia	China	No Transposon	0	No Integron	0	IncFII(S)_1, ColpVC_1	2	PHAGE_Phage_Gifsy_2_NC_010393(31), PHAGE_Entero_mEp237_NC_019704(3), PHAGE_Escher_500465_1_NC_049342(26), PHAGE_Shigel_SfIV_NC_022749(2), PHAGE_Entero_ST104_NC_005841(51), PHAGE_Escher_500465_2_NC_049343(4), PHAGE_Salmon_SJ46_NC_031129(3)	7
ERS2630780	L2b	1998	South America	Brazil	No Transposon	0	No Integron	0	IncFII(S)_1, ColpVC_1	2	PHAGE_Phage_Gifsy_2_NC_010393(25), PHAGE_Escher_500465_2_NC_049343(4), PHAGE_Shigel_SfIV_NC_022749(2), PHAGE_Clostr_c_st_NC_007581(2), PHAGE_Salmon_SJ46_NC_031129(3), PHAGE_Salmon_RE_2010_NC_019488(17)	6
X89	L2b	2022	Asia	China	No Transposon	0	No Integron	0	IncFII(S)_1, ColpVC_1	2	PHAGE_Phage_Gifsy_2_NC_010393(32), PHAGE_Shigel_SfIV_NC_022749(2), PHAGE_Entero_ST104_NC_005841(51), PHAGE_Escher_500465_2_NC_049343(4), PHAGE_Salmon_SJ46_NC_031129(3)	5
X216	L2b	2022	Asia	China	No Transposon	0	No Integron	0	IncFII(S)_1, ColpVC_1	2	PHAGE_Phage_Gifsy_2_NC_010393(31), PHAGE_Entero_mEp237_NC_019704(3), PHAGE_Klebsi_4LV2017_NC_047818(25), PHAGE_Shigel_SfIV_NC_022749(2), PHAGE_Entero_ST104_NC_005841(51), PHAGE_Escher_500465_2_NC_049343(4), PHAGE_Salmon_SJ46_NC_031129(3)	7
M205	L2b	2023	Asia	China	No Transposon	0	No Integron	0	IncFII(S)_1, ColpVC_1	2	PHAGE_Phage_Gifsy_2_NC_010393(32), PHAGE_Escher_500465_1_NC_049342(26), PHAGE_Shigel_SfIV_NC_022749(2), PHAGE_Entero_ST104_NC_005841(51), PHAGE_Escher_500465_2_NC_049343(4), PHAGE_Salmon_SJ46_NC_031129(3)	6
X5	L2b	2022	Asia	China	No Transposon	0	No Integron	0	IncFII(S)_1, ColpVC_1	2	PHAGE_Phage_Gifsy_2_NC_010393(32), PHAGE_Escher_500465_1_NC_049342(26), PHAGE_Shigel_SfIV_NC_022749(2), PHAGE_Entero_ST104_NC_005841(51), PHAGE_Escher_500465_2_NC_049343(4), PHAGE_Salmon_SJ46_NC_031129(3)	6
SAL03439	L2b	2012	Asia	China	Tn801	1	No Integron	0	IncFII(S)_1, IncX1_1, ColpVC_1	3	PHAGE_Phage_Gifsy_2_NC_010393(32), PHAGE_Shigel_SfIV_NC_022749(2), PHAGE_Escher_500465_2_NC_049343(4), PHAGE_Pseudo_vB_PaeS_PM105_NC_028667(1), PHAGE_Salmon_SJ46_NC_031129(3), PHAGE_Salmon_SJ46_NC_031129(6)	6
X90	L2b	2022	Asia	China	No Transposon	0	No Integron	0	IncFII(S)_1, ColpVC_1	2	PHAGE_Phage_Gifsy_2_NC_010393(31), PHAGE_Entero_mEp237_NC_019704(3), PHAGE_Entero_ST104_NC_005841(47), PHAGE_Shigel_SfIV_NC_022749(2), PHAGE_Escher_500465_2_NC_049343(4), PHAGE_Mycoba_SkinnyPete_NC_041882(1), PHAGE_Salmon_SJ46_NC_031129(3)	7
X113	L2b	2022	Asia	China	No Transposon	0	No Integron	0	IncFII(S)_1, ColpVC_1	2	PHAGE_Phage_Gifsy_2_NC_010393(32), PHAGE_Entero_ST104_NC_005841(47), PHAGE_Shigel_SfIV_NC_022749(2), PHAGE_Escher_500465_2_NC_049343(4), PHAGE_Salmon_SJ46_NC_031129(3)	5
X130	L2b	2022	Asia	China	No Transposon	0	No Integron	0	IncFII(S)_1, ColpVC_1	2	PHAGE_Phage_Gifsy_2_NC_010393(31), PHAGE_Entero_mEp237_NC_019704(3), PHAGE_Escher_500465_1_NC_049342(26), PHAGE_Shigel_SfIV_NC_022749(2), PHAGE_Entero_ST104_NC_005841(51), PHAGE_Escher_500465_2_NC_049343(4), PHAGE_Salmon_SJ46_NC_031129(3)	7
SAL02649	L2b	2018	Asia	China	Tn801	1	No Integron	0	IncFII(S)_1, IncX1_1, ColpVC_1	3	PHAGE_Phage_Gifsy_2_NC_010393(31), PHAGE_Entero_mEp237_NC_019704(3), PHAGE_Shigel_SfIV_NC_022749(2), PHAGE_Escher_500465_2_NC_049343(4), PHAGE_Mycoba_Xeno_NC_031243(1), PHAGE_Salmon_SJ46_NC_031129(3), PHAGE_Salmon_SJ46_NC_031129(6)	7
X177-2	L2b	2022	Asia	China	No Transposon	0	No Integron	0	IncFII(S)_1, ColpVC_1	2	PHAGE_Phage_Gifsy_2_NC_010393(31), PHAGE_Entero_mEp237_NC_019704(3), PHAGE_Klebsi_4LV2017_NC_047818(25), PHAGE_Entero_ST104_NC_005841(47), PHAGE_Shigel_SfIV_NC_022749(2), PHAGE_Escher_500465_2_NC_049343(4), PHAGE_Bacill_Shbh1_NC_030925(1), PHAGE_Salmon_SJ46_NC_031129(3)	8
SAL03307	L2b	2015	Asia	China	Tn801	1	No Integron	0	IncFII(S)_1, IncX1_1, ColpVC_1	3	PHAGE_Phage_Gifsy_2_NC_010393(31), PHAGE_Entero_mEp237_NC_019704(3), PHAGE_Shigel_SfIV_NC_022749(2), PHAGE_Escher_500465_2_NC_049343(4), PHAGE_Mycoba_Squirty_NC_026588(1), PHAGE_Salmon_SJ46_NC_031129(3), PHAGE_Salmon_SJ46_NC_031129(6)	7
X187	L2b	2022	Asia	China	No Transposon	0	No Integron	0	IncFII(S)_1, ColpVC_1	2	PHAGE_Phage_Gifsy_2_NC_010393(32), PHAGE_Entero_ST104_NC_005841(47), PHAGE_Shigel_SfIV_NC_022749(2), PHAGE_Escher_500465_2_NC_049343(4), PHAGE_Salmon_SJ46_NC_031129(3)	5
M162	L2b	2022	Asia	China	No Transposon	0	No Integron	0	IncFII(S)_1, ColpVC_1	2	PHAGE_Phage_Gifsy_2_NC_010393(31), PHAGE_Entero_mEp237_NC_019704(3), PHAGE_Escher_500465_1_NC_049342(26), PHAGE_Shigel_SfIV_NC_022749(2), PHAGE_Entero_ST104_NC_005841(51), PHAGE_Escher_500465_2_NC_049343(4), PHAGE_Ralsto_NP_2014_NC_023586(1), PHAGE_Salmon_SJ46_NC_031129(3)	8
SAL_PA7692AA	L2b	1962	Asia	China	No Transposon	0	No Integron	0	IncFII(S)_1, ColpVC_1	2	PHAGE_Phage_Gifsy_2_NC_010393(31), PHAGE_Entero_mEp237_NC_019704(3), PHAGE_Escher_500465_2_NC_049343(4), PHAGE_Shigel_SfIV_NC_022749(2), PHAGE_Salmon_SJ46_NC_031129(3), PHAGE_Entero_ST104_NC_005841(49)	6
MY0334	L2b	1970	Europe	UK	No Transposon	0	No Integron	0	IncFII(S)_1, ColpVC_1	2	PHAGE_Phage_Gifsy_2_NC_010393(31), PHAGE_Entero_mEp237_NC_019704(3), PHAGE_Shigel_SfIV_NC_022749(2), PHAGE_Escher_500465_2_NC_049343(4), PHAGE_Salmon_SJ46_NC_031129(3)	5
XXB1089	L2b	2011	Asia	China	No Transposon	0	No Integron	0	IncFII(S)_1, ColpVC_1	2	PHAGE_Phage_Gifsy_2_NC_010393(31), PHAGE_Entero_mEp237_NC_019704(3), PHAGE_Salmon_SJ46_NC_031129(3), PHAGE_Clostr_phiCD211_NC_029048(1), PHAGE_Klebsi_4LV2017_NC_047818(18), PHAGE_Entero_ST104_NC_005841(47), PHAGE_Shigel_SfIV_NC_022749(2), PHAGE_Escher_500465_2_NC_049343(4)	8
SAL_PA7738AA	L2b	1987	Europe	UK	No Transposon	0	No Integron	0	IncFII(S)_1, ColpVC_1	2	PHAGE_Phage_Gifsy_2_NC_010393(32), PHAGE_Shigel_SfIV_NC_022749(2), PHAGE_Escher_500465_2_NC_049343(4), PHAGE_Salmon_SJ46_NC_031129(3)	4
SAL02650	L2b	2018	Asia	China	Tn801	1	No Integron	0	IncFII(S)_1, IncX1_1, ColpVC_1	3	PHAGE_Phage_Gifsy_2_NC_010393(32), PHAGE_Escher_500465_1_NC_049342(12), PHAGE_Shigel_SfIV_NC_022749(2), PHAGE_Escher_500465_2_NC_049343(4), PHAGE_Ralsto_Rs551_NC_047765(1), PHAGE_Salmon_SJ46_NC_031129(3), PHAGE_Salmon_SJ46_NC_031129(6)	7
SAL_PB9893AA_AS	L2b	2018	Europe	France	Tn801	1	No Integron	0	IncFII(S)_1, IncX1_1, ColpVC_1	3	PHAGE_Salmon_SJ46_NC_031129(3), PHAGE_Salmon_SJ46_NC_031129(6), PHAGE_Phage_Gifsy_2_NC_010393(31), PHAGE_Entero_mEp237_NC_019704(3), PHAGE_Escher_500465_2_NC_049343(4), PHAGE_Shigel_SfIV_NC_022749(2)	6
SAL_PB9895AA_AS	L2b	2019	Europe	France	Tn801	1	No Integron	0	IncFII(S)_1, IncX1_1, ColpVC_1, ColpVC_1	4	PHAGE_Salmon_SJ46_NC_031129(3), PHAGE_Salmon_SJ46_NC_031129(6), PHAGE_Phage_Gifsy_2_NC_010393(32), PHAGE_Shigel_SfIV_NC_022749(2), PHAGE_Escher_500465_2_NC_049343(4)	5
GCA_000953595.1	L2b	1987	not collected	not collected	No Transposon	0	No Integron	0	No Plasmid	0	PHAGE_Entero_mEp237_NC_019704(4), PHAGE_Phage_Gifsy_2_NC_010393(31), PHAGE_Escher_500465_2_NC_049343(5), PHAGE_Escher_500465_1_NC_049342(12)	4
M47	L2b	2022	Asia	China	No Transposon	0	No Integron	0	IncFII(S)_1, ColpVC_1	2	PHAGE_Phage_Gifsy_2_NC_010393(31), PHAGE_Entero_mEp237_NC_019704(3), PHAGE_Escher_500465_1_NC_049342(25), PHAGE_Entero_ST104_NC_005841(47), PHAGE_Shigel_SfIV_NC_022749(2), PHAGE_Escher_500465_2_NC_049343(4), PHAGE_Salmon_SJ46_NC_031129(3)	7
MY0333	L2b	1970	Europe	UK	No Transposon	0	No Integron	0	No Plasmid	0	PHAGE_Escher_500465_2_NC_049343(5), PHAGE_Phage_Gifsy_2_NC_010393(32), PHAGE_Entero_mEp237_NC_019704(4), PHAGE_Bacill_G_NC_023719(4)	4
SAL02667	L2b	2011	Asia	China	Tn801	1	No Integron	0	IncFII(S)_1, IncX1_1, ColpVC_1	3	PHAGE_Phage_Gifsy_2_NC_010393(31), PHAGE_Entero_mEp237_NC_019704(3), PHAGE_Shigel_SfIV_NC_022749(2), PHAGE_Escher_500465_2_NC_049343(4), PHAGE_Salmon_SEN34_NC_028699(1), PHAGE_Salmon_SJ46_NC_031129(3)	6
SAL00732	L2b	2015	Asia	China	No Transposon	0	No Integron	0	IncFII(S)_1, ColpVC_1	2	PHAGE_Escher_500465_1_NC_049342(25), PHAGE_Shigel_SfIV_NC_022749(2), PHAGE_Entero_ST104_NC_005841(51), PHAGE_Salmon_Fels_1_NC_010391(5), PHAGE_Escher_500465_2_NC_049343(4), PHAGE_Phage_Gifsy_2_NC_010393(30), PHAGE_Salmon_SJ46_NC_031129(3)	7
X170	L2b	2022	Asia	China	No Transposon	0	No Integron	0	IncFII(S)_1, ColpVC_1	2	PHAGE_Phage_Gifsy_2_NC_010393(32), PHAGE_Entero_ST104_NC_005841(47), PHAGE_Shigel_SfIV_NC_022749(2), PHAGE_Escher_500465_2_NC_049343(4), PHAGE_Escher_RCS47_NC_042128(3)	5
M123	L2b	2022	Asia	China	No Transposon	0	No Integron	0	IncFII(S)_1, ColpVC_1	2	PHAGE_Phage_Gifsy_2_NC_010393(31), PHAGE_Entero_mEp237_NC_019704(3), PHAGE_Escher_500465_1_NC_049342(25), PHAGE_Shigel_SfIV_NC_022749(2), PHAGE_Entero_ST104_NC_005841(51), PHAGE_Escher_500465_2_NC_049343(4), PHAGE_Pseudo_PaMx28_NC_028931(1), PHAGE_Salmon_SJ46_NC_031129(3)	8
SAL03507	L2b	2019	Asia	China	No Transposon	0	No Integron	0	IncFII(S)_1, ColpVC_1	2	PHAGE_Phage_Gifsy_2_NC_010393(31), PHAGE_Entero_mEp237_NC_019704(3), PHAGE_Escher_500465_1_NC_049342(26), PHAGE_Shigel_SfIV_NC_022749(2), PHAGE_Entero_ST104_NC_005841(51), PHAGE_Escher_500465_2_NC_049343(4), PHAGE_Geobac_E3_NC_029073(1), PHAGE_Salmon_SJ46_NC_031129(3)	8
SAL02672	L2b	2011	Asia	China	Tn801	1	No Integron	0	IncX1_1, ColpVC_1, IncFII(S)_1	3	PHAGE_Phage_Gifsy_2_NC_010393(32), PHAGE_Shigel_SfIV_NC_022749(2), PHAGE_Escher_500465_2_NC_049343(4), PHAGE_Stx2_c_1717_NC_011357(3), PHAGE_Salmon_SJ46_NC_031129(3)	5
X97	L2b	2022	Asia	China	No Transposon	0	No Integron	0	IncFII(S)_1, ColpVC_1	2	PHAGE_Phage_Gifsy_2_NC_010393(32), PHAGE_Shigel_SfIV_NC_022749(2), PHAGE_Entero_ST104_NC_005841(51), PHAGE_Escher_500465_2_NC_049343(4), PHAGE_Salmon_SJ46_NC_031129(3)	5
X13	L2b	2022	Asia	China	No Transposon	0	No Integron	0	IncFII(S)_1, ColpVC_1	2	PHAGE_Phage_Gifsy_2_NC_010393(32), PHAGE_Escher_500465_1_NC_049342(25), PHAGE_Entero_ST104_NC_005841(47), PHAGE_Shigel_SfIV_NC_022749(2), PHAGE_Escher_500465_2_NC_049343(4), PHAGE_Escher_RCS47_NC_042128(3)	6
SAL02671	L2b	2011	Asia	China	Tn801	1	No Integron	0	IncFII(S)_1, IncX1_1, ColpVC_1	3	PHAGE_Phage_Gifsy_2_NC_010393(31), PHAGE_Entero_mEp237_NC_019704(3), PHAGE_Shigel_SfIV_NC_022749(2), PHAGE_Escher_500465_2_NC_049343(4), PHAGE_Salmon_SJ46_NC_031129(3)	5
SAL02648	L2b	2018	Asia	China	Tn801	1	No Integron	0	IncFII(S)_1, IncX1_1, ColpVC_1	3	PHAGE_Phage_Gifsy_2_NC_010393(31), PHAGE_Entero_mEp237_NC_019704(3), PHAGE_Shigel_SfIV_NC_022749(2), PHAGE_Escher_500465_2_NC_049343(4), PHAGE_Mycoba_Squirty_NC_026588(1), PHAGE_Salmon_SJ46_NC_031129(3), PHAGE_Salmon_SJ46_NC_031129(6)	7
X169	L2b	2022	Asia	China	No Transposon	0	No Integron	0	IncFII(S)_1, ColpVC_1	2	PHAGE_Phage_Gifsy_2_NC_010393(31), PHAGE_Entero_mEp237_NC_019704(3), PHAGE_Escher_500465_1_NC_049342(25), PHAGE_Entero_ST104_NC_005841(47), PHAGE_Shigel_SfIV_NC_022749(2), PHAGE_Escher_500465_2_NC_049343(4), PHAGE_Strept_7201_NC_002185(1), PHAGE_Salmon_SJ46_NC_031129(3)	8
X215	L2b	2022	Asia	China	No Transposon	0	No Integron	0	IncFII(S)_1, ColpVC_1	2	PHAGE_Phage_Gifsy_2_NC_010393(31), PHAGE_Entero_mEp237_NC_019704(3), PHAGE_Escher_500465_1_NC_049342(26), PHAGE_Entero_ST104_NC_005841(47), PHAGE_Shigel_SfIV_NC_022749(2), PHAGE_Escher_500465_2_NC_049343(4), PHAGE_Geobac_E3_NC_029073(1), PHAGE_Salmon_SJ46_NC_031129(3)	8
SAL04029	L2b	2017	Asia	China	Tn801	1	No Integron	0	IncFII(S)_1, IncX1_1, ColpVC_1	3	PHAGE_Phage_Gifsy_2_NC_010393(31), PHAGE_Entero_mEp237_NC_019704(3), PHAGE_Shigel_SfIV_NC_022749(2), PHAGE_Escher_500465_2_NC_049343(4), PHAGE_Salmon_SJ46_NC_031129(3), PHAGE_Salmon_SJ46_NC_031129(6)	6
M207	L2b	2023	Asia	China	No Transposon	0	No Integron	0	IncFII(S)_1, ColpVC_1	2	PHAGE_Phage_Gifsy_2_NC_010393(32), PHAGE_Escher_500465_1_NC_049342(26), PHAGE_Shigel_SfIV_NC_022749(2), PHAGE_Entero_ST104_NC_005841(51), PHAGE_Escher_500465_2_NC_049343(4), PHAGE_Salmon_SJ46_NC_031129(3)	6
SAL_PA7751AA	L2b	2001	South America	Brazil	No Transposon	0	No Integron	0	IncFII(S)_1, ColpVC_1	2	PHAGE_Escher_500465_2_NC_049343(4), PHAGE_Clostr_c_st_NC_007581(2), PHAGE_Salmon_SJ46_NC_031129(3), PHAGE_Phage_Gifsy_2_NC_010393(32), PHAGE_Shigel_SfIV_NC_022749(2)	5
SAL04028	L2b	2017	Asia	China	Tn801	1	No Integron	0	IncFII(S)_1, IncX1_1, ColpVC_1	3	PHAGE_Phage_Gifsy_2_NC_010393(31), PHAGE_Entero_mEp237_NC_019704(3), PHAGE_Shigel_SfIV_NC_022749(2), PHAGE_Escher_500465_2_NC_049343(4), PHAGE_Pseudo_B3_NC_006548(1), PHAGE_Salmon_SJ46_NC_031129(3), PHAGE_Salmon_SJ46_NC_031129(6)	7
X10	L2b	2022	Asia	China	No Transposon	0	No Integron	0	IncFII(S)_1, ColpVC_1	2	PHAGE_Phage_Gifsy_2_NC_010393(31), PHAGE_Entero_mEp237_NC_019704(3), PHAGE_Escher_500465_1_NC_049342(25), PHAGE_Shigel_SfIV_NC_022749(2), PHAGE_Entero_ST104_NC_005841(51), PHAGE_Escher_500465_2_NC_049343(4), PHAGE_Mycoba_SkinnyPete_NC_041882(1), PHAGE_Salmon_SJ46_NC_031129(3)	8
X177	L2b	2022	Asia	China	No Transposon	0	No Integron	0	IncFII(S)_1, ColpVC_1	2	PHAGE_Phage_Gifsy_2_NC_010393(31), PHAGE_Entero_mEp237_NC_019704(3), PHAGE_Klebsi_4LV2017_NC_047818(25), PHAGE_Shigel_SfIV_NC_022749(2), PHAGE_Entero_ST104_NC_005841(51), PHAGE_Escher_500465_2_NC_049343(4), PHAGE_Salmon_SJ46_NC_031129(3)	7
X186	L2b	2022	Asia	China	No Transposon	0	No Integron	0	IncFII(S)_1, ColpVC_1	2	PHAGE_Phage_Gifsy_2_NC_010393(32), PHAGE_Entero_ST104_NC_005841(47), PHAGE_Shigel_SfIV_NC_022749(2), PHAGE_Escher_500465_2_NC_049343(4), PHAGE_Salmon_SJ46_NC_031129(3)	5
X176	L2b	2022	Asia	China	No Transposon	0	No Integron	0	IncFII(S)_1, ColpVC_1	2	PHAGE_Phage_Gifsy_2_NC_010393(32), PHAGE_Shigel_SfIV_NC_022749(2), PHAGE_Entero_ST104_NC_005841(51), PHAGE_Escher_500465_2_NC_049343(4), PHAGE_Salmon_SJ46_NC_031129(3)	5
M281	L2b	2023	Asia	China	No Transposon	0	No Integron	0	IncFII(S)_1, ColpVC_1	2	PHAGE_Phage_Gifsy_2_NC_010393(29), PHAGE_Entero_mEp237_NC_019704(3), PHAGE_Escher_500465_1_NC_049342(26), PHAGE_Entero_ST104_NC_005841(47), PHAGE_Shigel_SfIV_NC_022749(2), PHAGE_Escher_500465_2_NC_049343(4), PHAGE_Salmon_SJ46_NC_031129(3)	7
SAL02670	L2b	2011	Asia	China	Tn801	1	No Integron	0	IncFII(S)_1, IncX1_1, ColpVC_1	3	PHAGE_Phage_Gifsy_2_NC_010393(31), PHAGE_Entero_mEp237_NC_019704(3), PHAGE_Shigel_SfIV_NC_022749(2), PHAGE_Escher_500465_2_NC_049343(4), PHAGE_Mycoba_Xeno_NC_031243(1), PHAGE_Salmon_SJ46_NC_031129(3), PHAGE_Salmon_SJ46_NC_031129(7)	7
M9-1	L2b	2022	Asia	China	No Transposon	0	No Integron	0	IncFII(S)_1, ColpVC_1	2	PHAGE_Phage_Gifsy_2_NC_010393(30), PHAGE_Klebsi_4LV2017_NC_047818(25), PHAGE_Shigel_SfIV_NC_022749(2), PHAGE_Entero_ST104_NC_005841(51), PHAGE_Escher_500465_2_NC_049343(4), PHAGE_Salmon_SJ46_NC_031129(3)	6
SAL02673	L2b	2011	Asia	China	Tn801	1	No Integron	0	IncFII(S)_1, IncX1_1, ColpVC_1	3	PHAGE_Phage_Gifsy_2_NC_010393(31), PHAGE_Entero_mEp237_NC_019704(3), PHAGE_Shigel_SfIV_NC_022749(2), PHAGE_Escher_500465_2_NC_049343(4), PHAGE_Salmon_SJ46_NC_031129(3)	5
SAL04090	L2b	2019	Asia	China	Tn801	1	No Integron	0	IncFII(S)_1, IncX1_1, ColpVC_1	3	PHAGE_Phage_Gifsy_2_NC_010393(31), PHAGE_Entero_mEp237_NC_019704(3), PHAGE_Shigel_SfIV_NC_022749(2), PHAGE_Escher_500465_2_NC_049343(4), PHAGE_Salmon_SJ46_NC_031129(3), PHAGE_Salmon_SJ46_NC_031129(6)	6
SAL04095	L2b	2019	Asia	China	Tn801	1	No Integron	0	IncFII(S)_1, IncX1_1, ColpVC_1	3	PHAGE_Phage_Gifsy_2_NC_010393(31), PHAGE_Entero_mEp237_NC_019704(3), PHAGE_Shigel_SfIV_NC_022749(2), PHAGE_Escher_500465_2_NC_049343(4), PHAGE_Ralsto_RSM3_NC_011399(1), PHAGE_Salmon_SJ46_NC_031129(3), PHAGE_Salmon_SJ46_NC_031129(6)	7
SAL03437	L2b	2012	Asia	China	Tn801	1	No Integron	0	IncFII(S)_1, IncX1_1, ColpVC_1	3	PHAGE_Phage_Gifsy_2_NC_010393(32), PHAGE_Shigel_SfIV_NC_022749(2), PHAGE_Escher_500465_2_NC_049343(4), PHAGE_Salmon_SJ46_NC_031129(3), PHAGE_Salmon_SJ46_NC_031129(6)	5
X79	L2b	2022	Asia	China	No Transposon	0	No Integron	0	IncFII(S)_1, ColpVC_1	2	PHAGE_Phage_Gifsy_2_NC_010393(32), PHAGE_Escher_500465_1_NC_049342(26), PHAGE_Entero_ST104_NC_005841(47), PHAGE_Shigel_SfIV_NC_022749(2), PHAGE_Escher_500465_2_NC_049343(4), PHAGE_Salmon_SJ46_NC_031129(3)	6
SAL03497	L2b	2019	Asia	China	No Transposon	0	No Integron	0	IncFII(S)_1, ColpVC_1	2	PHAGE_Phage_Gifsy_2_NC_010393(32), PHAGE_Escher_500465_1_NC_049342(26), PHAGE_Shigel_SfIV_NC_022749(2), PHAGE_Entero_ST104_NC_005841(51), PHAGE_Escher_500465_2_NC_049343(4), PHAGE_Salmon_SJ46_NC_031129(3)	6
M307	L2b	2023	Asia	China	No Transposon	0	No Integron	0	IncFII(S)_1, ColpVC_1	2	PHAGE_Phage_Gifsy_2_NC_010393(31), PHAGE_Entero_mEp237_NC_019704(3), PHAGE_Klebsi_4LV2017_NC_047818(25), PHAGE_Shigel_SfIV_NC_022749(2), PHAGE_Entero_ST104_NC_005841(51), PHAGE_Escher_500465_2_NC_049343(4), PHAGE_Salmon_SJ46_NC_031129(3)	7
SRR26663521	L2b	2022	Asia	China	No Transposon	0	No Integron	0	IncFII(S)_1, ColpVC_1	2	PHAGE_Escher_500465_1_NC_049342(25), PHAGE_Shigel_SfIV_NC_022749(2), PHAGE_Entero_ST104_NC_005841(51), PHAGE_Escher_500465_2_NC_049343(4), PHAGE_Phage_Gifsy_2_NC_010393(29), PHAGE_Entero_mEp237_NC_019704(3), PHAGE_Pseudo_B3_NC_006548(1), PHAGE_Salmon_SJ46_NC_031129(3)	8
X153	L2b	2022	Asia	China	No Transposon	0	No Integron	0	IncFII(S)_1, ColpVC_1	2	PHAGE_Phage_Gifsy_2_NC_010393(31), PHAGE_Entero_mEp237_NC_019704(3), PHAGE_Escher_500465_1_NC_049342(25), PHAGE_Entero_ST104_NC_005841(47), PHAGE_Shigel_SfIV_NC_022749(2), PHAGE_Escher_500465_2_NC_049343(4), PHAGE_Salmon_SJ46_NC_031129(3)	7
X67	L2b	2022	Asia	China	No Transposon	0	No Integron	0	IncFII(S)_1, ColpVC_1	2	PHAGE_Phage_Gifsy_2_NC_010393(31), PHAGE_Entero_mEp237_NC_019704(3), PHAGE_Klebsi_4LV2017_NC_047818(25), PHAGE_Entero_ST104_NC_005841(47), PHAGE_Shigel_SfIV_NC_022749(2), PHAGE_Escher_500465_2_NC_049343(4), PHAGE_Salmon_SJ46_NC_031129(3)	7
M113	L2b	2022	Asia	China	No Transposon	0	No Integron	0	IncFII(S)_1, ColpVC_1	2	PHAGE_Phage_Gifsy_2_NC_010393(32), PHAGE_Klebsi_4LV2017_NC_047818(25), PHAGE_Shigel_SfIV_NC_022749(2), PHAGE_Entero_ST104_NC_005841(51), PHAGE_Escher_500465_2_NC_049343(4), PHAGE_Salmon_SJ46_NC_031129(3)	6
X134	L2b	2022	Asia	China	No Transposon	0	No Integron	0	IncFII(S)_1, ColpVC_1	2	PHAGE_Phage_Gifsy_2_NC_010393(32), PHAGE_Escher_500465_1_NC_049342(26), PHAGE_Entero_ST104_NC_005841(47), PHAGE_Shigel_SfIV_NC_022749(2), PHAGE_Escher_500465_2_NC_049343(4), PHAGE_Escher_RCS47_NC_042128(3)	6
SAL03286	L2b	2015	Asia	China	Tn801	1	No Integron	0	IncFII(S)_1, IncX1_1, ColpVC_1	3	PHAGE_Phage_Gifsy_2_NC_010393(31), PHAGE_Entero_mEp237_NC_019704(3), PHAGE_Shigel_SfIV_NC_022749(2), PHAGE_Escher_500465_2_NC_049343(4), PHAGE_Salmon_SJ46_NC_031129(3), PHAGE_Salmon_SJ46_NC_031129(6)	6
SAL_KA3505AA	L2b	2006	Asia	China	No Transposon	0	No Integron	0	No Plasmid	0	PHAGE_Escher_500465_2_NC_049343(5), PHAGE_Phage_Gifsy_2_NC_010393(31), PHAGE_Entero_mEp237_NC_019704(4), PHAGE_Salmon_118970_sal4_NC_030919(2), PHAGE_Entero_ST104_NC_005841(46), PHAGE_Escher_500465_1_NC_049342(12), PHAGE_Klebsi_4LV2017_NC_047818(27)	7
SAL00726	L2b	2015	Asia	China	No Transposon	0	No Integron	0	IncFII(S)_1, ColpVC_1	2	PHAGE_Escher_500465_2_NC_049343(4), PHAGE_Escher_500465_1_NC_049342(26), PHAGE_Shigel_SfIV_NC_022749(2), PHAGE_Phage_Gifsy_2_NC_010393(5), PHAGE_Salmon_SJ46_NC_031129(3), PHAGE_Pseudo_PaMx28_NC_028931(1), PHAGE_Entero_ST104_NC_005841(49), PHAGE_Phage_Gifsy_2_NC_010393(31)	8
SAL03303	L2b	2015	Asia	China	Tn801	1	No Integron	0	IncFII(S)_1, IncX1_1, ColpVC_1	3	PHAGE_Phage_Gifsy_2_NC_010393(32), PHAGE_Shigel_SfIV_NC_022749(2), PHAGE_Escher_500465_2_NC_049343(4), PHAGE_Salmon_SJ46_NC_031129(3), PHAGE_Salmon_SJ46_NC_031129(6)	5
X19	L2b	2022	Asia	China	No Transposon	0	No Integron	0	IncFII(S)_1, ColpVC_1	2	PHAGE_Phage_Gifsy_2_NC_010393(31), PHAGE_Entero_mEp237_NC_019704(3), PHAGE_Entero_ST104_NC_005841(47), PHAGE_Shigel_SfIV_NC_022749(2), PHAGE_Escher_500465_2_NC_049343(4), PHAGE_Salmon_SJ46_NC_031129(3)	6
X82	L2b	2022	Asia	China	No Transposon	0	No Integron	0	IncFII(S)_1, ColpVC_1	2	PHAGE_Phage_Gifsy_2_NC_010393(31), PHAGE_Entero_mEp237_NC_019704(3), PHAGE_Shigel_SfIV_NC_022749(2), PHAGE_Entero_ST104_NC_005841(51), PHAGE_Escher_500465_2_NC_049343(4), PHAGE_Salmon_SJ46_NC_031129(3)	6
M275	L2b	2023	Asia	China	No Transposon	0	No Integron	0	IncFII(S)_1, ColpVC_1	2	PHAGE_Phage_Gifsy_2_NC_010393(32), PHAGE_Escher_500465_1_NC_049342(26), PHAGE_Shigel_SfIV_NC_022749(2), PHAGE_Entero_ST104_NC_005841(51), PHAGE_Escher_500465_2_NC_049343(4), PHAGE_Salmon_SJ46_NC_031129(3)	6
X105	L2b	2022	Asia	China	No Transposon	0	No Integron	0	IncFII(S)_1, ColpVC_1	2	PHAGE_Phage_Gifsy_2_NC_010393(31), PHAGE_Entero_mEp237_NC_019704(3), PHAGE_Klebsi_4LV2017_NC_047818(25), PHAGE_Entero_ST104_NC_005841(47), PHAGE_Shigel_SfIV_NC_022749(2), PHAGE_Escher_500465_2_NC_049343(4), PHAGE_Ralsto_RSM1_NC_008574(1), PHAGE_Salmon_SJ46_NC_031129(3)	8
SAL_PA7710AA	L2b	2008	Asia	China	No Transposon	0	No Integron	0	IncFII(S)_1, ColpVC_1	2	PHAGE_Escher_500465_1_NC_049342(26), PHAGE_Entero_ST104_NC_005841(49), PHAGE_Phage_Gifsy_2_NC_010393(32), PHAGE_Salmon_SJ46_NC_031129(3), PHAGE_Burkho_BcepMu_NC_005882(1), PHAGE_Shigel_SfIV_NC_022749(2), PHAGE_Escher_500465_2_NC_049343(4)	7
X98	L2b	2022	Asia	China	No Transposon	0	No Integron	0	IncFII(S)_1, ColpVC_1	2	PHAGE_Phage_Gifsy_2_NC_010393(31), PHAGE_Entero_mEp237_NC_019704(3), PHAGE_Shigel_SfIV_NC_022749(2), PHAGE_Entero_ST104_NC_005841(51), PHAGE_Escher_500465_2_NC_049343(4), PHAGE_Salmon_SJ46_NC_031129(3)	6
X230	L2b	2022	Asia	China	No Transposon	0	No Integron	0	IncFII(S)_1, ColpVC_1	2	PHAGE_Phage_Gifsy_2_NC_010393(32), PHAGE_Escher_500465_1_NC_049342(25), PHAGE_Shigel_SfIV_NC_022749(2), PHAGE_Entero_ST104_NC_005841(51), PHAGE_Escher_500465_2_NC_049343(4), PHAGE_Salmon_SJ46_NC_031129(3)	6
SAL03402	L2b	2014	Asia	China	Tn801	1	No Integron	0	IncFII(S)_1, IncX1_1, ColpVC_1	3	PHAGE_Phage_Gifsy_2_NC_010393(31), PHAGE_Entero_mEp237_NC_019704(3), PHAGE_Shigel_SfIV_NC_022749(2), PHAGE_Escher_500465_2_NC_049343(4), PHAGE_Salmon_SJ46_NC_031129(3), PHAGE_Salmon_SJ46_NC_031129(6)	6
M303	L2b	2023	Asia	China	No Transposon	0	No Integron	0	IncFII(S)_1, ColpVC_1	2	PHAGE_Phage_Gifsy_2_NC_010393(31), PHAGE_Entero_mEp237_NC_019704(3), PHAGE_Escher_500465_1_NC_049342(26), PHAGE_Shigel_SfIV_NC_022749(2), PHAGE_Entero_ST104_NC_005841(51), PHAGE_Escher_500465_2_NC_049343(4), PHAGE_Mycoba_Xeno_NC_031243(1), PHAGE_Salmon_SJ46_NC_031129(3)	8
X165	L2b	2022	Asia	China	No Transposon	0	No Integron	0	IncFII(S)_1, ColpVC_1	2	PHAGE_Phage_Gifsy_2_NC_010393(31), PHAGE_Entero_mEp237_NC_019704(3), PHAGE_Shigel_SfIV_NC_022749(2), PHAGE_Entero_ST104_NC_005841(51), PHAGE_Escher_500465_2_NC_049343(4), PHAGE_Burkho_BcepMu_NC_005882(1), PHAGE_Salmon_SJ46_NC_031129(3)	7
X26	L2b	2022	Asia	China	No Transposon	0	No Integron	0	IncFII(S)_1, ColpVC_1	2	PHAGE_Phage_Gifsy_2_NC_010393(32), PHAGE_Escher_500465_1_NC_049342(25), PHAGE_Shigel_SfIV_NC_022749(2), PHAGE_Entero_ST104_NC_005841(51), PHAGE_Escher_500465_2_NC_049343(4), PHAGE_Salmon_SJ46_NC_031129(3)	6
M29	L2b	2022	Asia	China	No Transposon	0	No Integron	0	IncFII(S)_1, ColpVC_1	2	PHAGE_Phage_Gifsy_2_NC_010393(31), PHAGE_Entero_mEp237_NC_019704(3), PHAGE_Shigel_SfIV_NC_022749(2), PHAGE_Entero_ST104_NC_005841(51), PHAGE_Escher_500465_2_NC_049343(4), PHAGE_Salmon_SJ46_NC_031129(3)	6
M90-1	L2b	2022	Asia	China	No Transposon	0	No Integron	0	IncFII(S)_1, ColpVC_1	2	PHAGE_Phage_Gifsy_2_NC_010393(31), PHAGE_Entero_mEp237_NC_019704(3), PHAGE_Escher_500465_1_NC_049342(25), PHAGE_Entero_ST104_NC_005841(47), PHAGE_Shigel_SfIV_NC_022749(2), PHAGE_Escher_500465_2_NC_049343(4), PHAGE_Geobac_E3_NC_029073(1), PHAGE_Salmon_SJ46_NC_031129(3)	8
X84	L2b	2022	Asia	China	No Transposon	0	No Integron	0	IncFII(S)_1, ColpVC_1	2	PHAGE_Phage_Gifsy_2_NC_010393(32), PHAGE_Klebsi_4LV2017_NC_047818(25), PHAGE_Shigel_SfIV_NC_022749(2), PHAGE_Entero_ST104_NC_005841(51), PHAGE_Escher_500465_2_NC_049343(4), PHAGE_Escher_RCS47_NC_042128(3)	6
ERS2630810	L2b	1986	Europe	UK	No Transposon	0	No Integron	0	IncFII(S)_1, ColpVC_1	2	PHAGE_Phage_Gifsy_2_NC_010393(32), PHAGE_Shigel_SfIV_NC_022749(2), PHAGE_Escher_500465_2_NC_049343(4), PHAGE_Salmon_SJ46_NC_031129(3)	4
SAL00728	L2b	2015	Asia	China	No Transposon	0	No Integron	0	IncFII(S)_1, ColpVC_1	2	PHAGE_Phage_Gifsy_2_NC_010393(31), PHAGE_Entero_mEp237_NC_019704(3), PHAGE_Escher_500465_1_NC_049342(26), PHAGE_Shigel_SfIV_NC_022749(2), PHAGE_Escher_500465_2_NC_049343(4), PHAGE_Edward_GF_2_NC_026611(1), PHAGE_Salmon_SJ46_NC_031129(3), PHAGE_Entero_ST104_NC_005841(49)	8
SAL02666	L2b	2011	Asia	China	No Transposon	0	No Integron	0	IncFII(S)_1, ColpVC_1	2	PHAGE_Phage_Gifsy_2_NC_010393(32), PHAGE_Escher_500465_1_NC_049342(26), PHAGE_Shigel_SfIV_NC_022749(2), PHAGE_Entero_ST104_NC_005841(51), PHAGE_Escher_500465_2_NC_049343(4), PHAGE_Escher_RCS47_NC_042128(3)	6
X65	L2b	2022	Asia	China	No Transposon	0	No Integron	0	IncFII(S)_1, ColpVC_1	2	PHAGE_Phage_Gifsy_2_NC_010393(32), PHAGE_Entero_ST104_NC_005841(47), PHAGE_Shigel_SfIV_NC_022749(2), PHAGE_Escher_500465_2_NC_049343(4), PHAGE_Salmon_SJ46_NC_031129(3)	5
X140	L2b	2022	Asia	China	No Transposon	0	No Integron	0	IncFII(S)_1, ColpVC_1	2	PHAGE_Phage_Gifsy_2_NC_010393(31), PHAGE_Entero_mEp237_NC_019704(3), PHAGE_Escher_500465_1_NC_049342(26), PHAGE_Entero_ST104_NC_005841(47), PHAGE_Shigel_SfIV_NC_022749(2), PHAGE_Escher_500465_2_NC_049343(4), PHAGE_Strept_7201_NC_002185(1), PHAGE_Salmon_SJ46_NC_031129(3)	8
SAL03496	L2b	2019	Asia	China	Tn6292	1	No Integron	0	IncFII(S)_1, ColpVC_1	2	PHAGE_Phage_Gifsy_2_NC_010393(31), PHAGE_Entero_mEp237_NC_019704(3), PHAGE_Escher_500465_1_NC_049342(26), PHAGE_Entero_ST104_NC_005841(47), PHAGE_Shigel_SfIV_NC_022749(2), PHAGE_Escher_500465_2_NC_049343(4), PHAGE_Salmon_SJ46_NC_031129(3)	7
SAL00731	L2b	2015	Asia	China	No Transposon	0	No Integron	0	IncFII(S)_1, ColpVC_1	2	PHAGE_Phage_Gifsy_2_NC_010393(31), PHAGE_Entero_mEp237_NC_019704(3), PHAGE_Escher_500465_1_NC_049342(25), PHAGE_Shigel_SfIV_NC_022749(2), PHAGE_Entero_ST104_NC_005841(48), PHAGE_Escher_500465_2_NC_049343(4), PHAGE_Salmon_SJ46_NC_031129(3)	7
SAL03291	L2b	2015	Asia	China	Tn801	1	No Integron	0	IncFII(S)_1, IncX1_1, ColpVC_1	3	PHAGE_Phage_Gifsy_2_NC_010393(31), PHAGE_Entero_mEp237_NC_019704(4), PHAGE_Shigel_SfIV_NC_022749(2), PHAGE_Escher_500465_2_NC_049343(4), PHAGE_Salmon_SJ46_NC_031129(3), PHAGE_Salmon_SJ46_NC_031129(6)	6
X207	L2b	2022	Asia	China	No Transposon	0	No Integron	0	IncFII(S)_1, ColpVC_1	2	PHAGE_Phage_Gifsy_2_NC_010393(32), PHAGE_Escher_500465_1_NC_049342(25), PHAGE_Entero_ST104_NC_005841(47), PHAGE_Shigel_SfIV_NC_022749(2), PHAGE_Escher_500465_2_NC_049343(4), PHAGE_Salmon_SJ46_NC_031129(3)	6
M227	L2b	2023	Asia	China	No Transposon	0	No Integron	0	IncFII(S)_1, ColpVC_1	2	PHAGE_Phage_Gifsy_2_NC_010393(31), PHAGE_Entero_mEp237_NC_019704(3), PHAGE_Escher_500465_1_NC_049342(25), PHAGE_Shigel_SfIV_NC_022749(2), PHAGE_Entero_ST104_NC_005841(51), PHAGE_Escher_500465_2_NC_049343(4), PHAGE_Ralsto_RSM3_NC_011399(1), PHAGE_Salmon_SJ46_NC_031129(3)	8
SAL_PA7742AA	L2b	1982	Asia	China	No Transposon	0	No Integron	0	IncFII(S)_1, ColpVC_1	2	PHAGE_Shigel_SfIV_NC_022749(2), PHAGE_Entero_ST104_NC_005841(49), PHAGE_Salmon_SJ46_NC_031129(3), PHAGE_Escher_500465_2_NC_049343(4), PHAGE_Phage_Gifsy_2_NC_010393(32)	5
M9-3	L2b	2022	Asia	China	No Transposon	0	No Integron	0	IncFII(S)_1, ColpVC_1	2	PHAGE_Phage_Gifsy_2_NC_010393(29), PHAGE_Entero_mEp237_NC_019704(3), PHAGE_Klebsi_4LV2017_NC_047818(25), PHAGE_Entero_ST104_NC_005841(47), PHAGE_Shigel_SfIV_NC_022749(2), PHAGE_Escher_500465_2_NC_049343(4), PHAGE_Bacill_Shbh1_NC_030925(1), PHAGE_Salmon_SJ46_NC_031129(3)	8
SAL_PA7717AA	L2b	1973	Asia	China	No Transposon	0	No Integron	0	IncFII(S)_1, ColpVC_1	2	PHAGE_Entero_ST104_NC_005841(47), PHAGE_Shigel_SfIV_NC_022749(2), PHAGE_Phage_Gifsy_2_NC_010393(32), PHAGE_Salmon_SJ46_NC_031129(3), PHAGE_Escher_500465_2_NC_049343(4)	5
M206	L2b	2023	Asia	China	No Transposon	0	No Integron	0	IncFII(S)_1, ColpVC_1	2	PHAGE_Phage_Gifsy_2_NC_010393(31), PHAGE_Entero_mEp237_NC_019704(3), PHAGE_Klebsi_4LV2017_NC_047818(25), PHAGE_Entero_ST104_NC_005841(47), PHAGE_Shigel_SfIV_NC_022749(2), PHAGE_Escher_500465_2_NC_049343(4), PHAGE_Salmon_SEN34_NC_028699(1), PHAGE_Salmon_SJ46_NC_031129(3)	8
M132	L2b	2022	Asia	China	No Transposon	0	No Integron	0	IncFII(S)_1, ColpVC_1	2	PHAGE_Phage_Gifsy_2_NC_010393(31), PHAGE_Entero_mEp237_NC_019704(3), PHAGE_Escher_500465_1_NC_049342(26), PHAGE_Entero_ST104_NC_005841(47), PHAGE_Shigel_SfIV_NC_022749(2), PHAGE_Escher_500465_2_NC_049343(4), PHAGE_Mycoba_Charlie_NC_023729(1), PHAGE_Salmon_SJ46_NC_031129(3)	8
SAL02647	L2b	2017	Asia	China	Tn801	1	No Integron	0	IncFII(S)_1, IncX1_1, ColpVC_1	3	PHAGE_Phage_Gifsy_2_NC_010393(32), PHAGE_Shigel_SfIV_NC_022749(2), PHAGE_Escher_500465_2_NC_049343(4), PHAGE_Salmon_SJ46_NC_031129(3), PHAGE_Salmon_SJ46_NC_031129(6)	5
X237	L2b	2022	Asia	China	No Transposon	0	No Integron	0	IncFII(S)_1, ColpVC_1	2	PHAGE_Phage_Gifsy_2_NC_010393(31), PHAGE_Entero_mEp237_NC_019704(3), PHAGE_Escher_500465_1_NC_049342(26), PHAGE_Entero_ST104_NC_005841(47), PHAGE_Shigel_SfIV_NC_022749(2), PHAGE_Escher_500465_2_NC_049343(4), PHAGE_Strept_7201_NC_002185(1), PHAGE_Salmon_SJ46_NC_031129(3)	8
X145	L2b	2022	Asia	China	No Transposon	0	No Integron	0	IncFII(S)_1, ColpVC_1	2	PHAGE_Phage_Gifsy_2_NC_010393(31), PHAGE_Entero_mEp237_NC_019704(3), PHAGE_Escher_500465_1_NC_049342(25), PHAGE_Shigel_SfIV_NC_022749(2), PHAGE_Entero_ST104_NC_005841(51), PHAGE_Escher_500465_2_NC_049343(4), PHAGE_Salmon_SEN34_NC_028699(1), PHAGE_Salmon_SJ46_NC_031129(3)	8
ERS2630773	L2b	1949	Europe	Denmark	No Transposon	0	No Integron	0	IncFII(S)_1, ColpVC_1	2	PHAGE_Phage_Gifsy_2_NC_010393(31), PHAGE_Entero_mEp237_NC_019704(3), PHAGE_Escher_500465_2_NC_049343(4), PHAGE_Shigel_SfIV_NC_022749(2), PHAGE_Salmon_SJ46_NC_031129(3)	5
ERS088716	L2b	1987	not collected	not collected	No Transposon	0	No Integron	0	IncFII(S)_1, ColpVC_1	2	PHAGE_Phage_Gifsy_2_NC_010393(31), PHAGE_Entero_mEp237_NC_019704(3), PHAGE_Escher_500465_2_NC_049343(4), PHAGE_Pseudo_B3_NC_006548(1), PHAGE_Salmon_SJ46_NC_031129(3)	5
M313	L2b	2023	Asia	China	No Transposon	0	No Integron	0	IncFII(S)_1, ColpVC_1	2	PHAGE_Phage_Gifsy_2_NC_010393(31), PHAGE_Entero_mEp237_NC_019704(3), PHAGE_Escher_500465_1_NC_049342(26), PHAGE_Entero_ST104_NC_005841(47), PHAGE_Shigel_SfIV_NC_022749(2), PHAGE_Escher_500465_2_NC_049343(4), PHAGE_Burkho_phiE255_NC_009237(1), PHAGE_Salmon_SJ46_NC_031129(3)	8
M163	L2b	2022	Asia	China	No Transposon	0	No Integron	0	IncFII(S)_1, ColpVC_1	2	PHAGE_Phage_Gifsy_2_NC_010393(31), PHAGE_Entero_mEp237_NC_019704(3), PHAGE_Shigel_SfIV_NC_022749(2), PHAGE_Entero_ST104_NC_005841(51), PHAGE_Escher_500465_2_NC_049343(4), PHAGE_Salmon_SEN34_NC_028699(1), PHAGE_Salmon_SJ46_NC_031129(3)	7
X80	L2b	2022	Asia	China	No Transposon	0	No Integron	0	IncFII(S)_1, ColpVC_1	2	PHAGE_Phage_Gifsy_2_NC_010393(31), PHAGE_Entero_mEp237_NC_019704(3), PHAGE_Escher_500465_1_NC_049342(26), PHAGE_Entero_ST104_NC_005841(47), PHAGE_Shigel_SfIV_NC_022749(2), PHAGE_Escher_500465_2_NC_049343(4), PHAGE_Escher_RCS47_NC_042128(1), PHAGE_Salmon_SJ46_NC_031129(3)	8
X49	L2b	2022	Asia	China	No Transposon	0	No Integron	0	IncFII(S)_1, ColpVC_1	2	PHAGE_Phage_Gifsy_2_NC_010393(31), PHAGE_Entero_mEp237_NC_019704(3), PHAGE_Escher_500465_1_NC_049342(26), PHAGE_Entero_ST104_NC_005841(47), PHAGE_Shigel_SfIV_NC_022749(2), PHAGE_Escher_500465_2_NC_049343(4), PHAGE_Burkho_KS14_NC_015273(1), PHAGE_Salmon_SJ46_NC_031129(3)	8
SAL03306	L2b	2015	Asia	China	Tn801	1	No Integron	0	IncFII(S)_1, IncX1_1, ColpVC_1	3	PHAGE_Phage_Gifsy_2_NC_010393(32), PHAGE_Shigel_SfIV_NC_022749(2), PHAGE_Escher_500465_2_NC_049343(4), PHAGE_Salmon_SJ46_NC_031129(3), PHAGE_Salmon_SJ46_NC_031129(6)	5
SAL_FB6640AA	L2b	2014	South America	Brazil	No Transposon	0	No Integron	0	ColpVC_1, IncFII(S)_1	2	PHAGE_Shigel_SfIV_NC_022749(2), PHAGE_Phage_Gifsy_2_NC_010393(30), PHAGE_Entero_mEp237_NC_019704(3), PHAGE_Escher_500465_1_NC_049342(26), PHAGE_Salmon_SJ46_NC_031129(3)	5
M265	L2b	2023	Asia	China	No Transposon	0	No Integron	0	IncFII(S)_1, ColpVC_1	2	PHAGE_Phage_Gifsy_2_NC_010393(30), PHAGE_Escher_500465_1_NC_049342(26), PHAGE_Entero_ST104_NC_005841(47), PHAGE_Shigel_SfIV_NC_022749(2), PHAGE_Escher_500465_2_NC_049343(4), PHAGE_Salmon_SJ46_NC_031129(3)	6
X93	L2b	2022	Asia	China	No Transposon	0	No Integron	0	IncFII(S)_1, ColpVC_1	2	PHAGE_Phage_Gifsy_2_NC_010393(32), PHAGE_Escher_500465_1_NC_049342(26), PHAGE_Entero_ST104_NC_005841(47), PHAGE_Shigel_SfIV_NC_022749(2), PHAGE_Escher_500465_2_NC_049343(4), PHAGE_Salmon_SJ46_NC_031129(3)	6
X195	L2b	2022	Asia	China	No Transposon	0	No Integron	0	IncFII(S)_1, ColpVC_1	2	PHAGE_Phage_Gifsy_2_NC_010393(31), PHAGE_Entero_mEp237_NC_019704(3), PHAGE_Escher_500465_1_NC_049342(26), PHAGE_Shigel_SfIV_NC_022749(2), PHAGE_Entero_ST104_NC_005841(51), PHAGE_Escher_500465_2_NC_049343(4), PHAGE_Salmon_SJ46_NC_031129(3)	7
SAL_PA7721AA	L2b	1968	Asia	China	No Transposon	0	No Integron	0	IncFII(S)_1, ColpVC_1	2	PHAGE_Escher_500465_2_NC_049343(4), PHAGE_Shigel_SfIV_NC_022749(2), PHAGE_Entero_ST104_NC_005841(49), PHAGE_Phage_Gifsy_2_NC_010393(31), PHAGE_Entero_mEp237_NC_019704(3), PHAGE_Salmon_SJ46_NC_031129(3)	6
M134	L2b	2022	Asia	China	No Transposon	0	No Integron	0	IncFII(S)_1, ColpVC_1	2	PHAGE_Phage_Gifsy_2_NC_010393(29), PHAGE_Entero_mEp237_NC_019704(3), PHAGE_Escher_500465_1_NC_049342(25), PHAGE_Shigel_SfIV_NC_022749(2), PHAGE_Entero_ST104_NC_005841(51), PHAGE_Escher_500465_2_NC_049343(4), PHAGE_Mycoba_Charlie_NC_023729(1), PHAGE_Salmon_SJ46_NC_031129(3)	8
X156	L2b	2022	Asia	China	No Transposon	0	No Integron	0	IncFII(S)_1, ColpVC_1	2	PHAGE_Phage_Gifsy_2_NC_010393(31), PHAGE_Entero_mEp237_NC_019704(3), PHAGE_Escher_500465_1_NC_049342(26), PHAGE_Shigel_SfIV_NC_022749(2), PHAGE_Entero_ST104_NC_005841(51), PHAGE_Escher_500465_2_NC_049343(4), PHAGE_Salmon_SJ46_NC_031129(3)	7
X135	L2b	2022	Asia	China	No Transposon	0	No Integron	0	IncFII(S)_1, ColpVC_1	2	PHAGE_Phage_Gifsy_2_NC_010393(31), PHAGE_Entero_mEp237_NC_019704(3), PHAGE_Klebsi_4LV2017_NC_047818(25), PHAGE_Entero_ST104_NC_005841(47), PHAGE_Shigel_SfIV_NC_022749(2), PHAGE_Escher_500465_2_NC_049343(4), PHAGE_Salmon_SJ46_NC_031129(3)	7
SAL_PA7687AA	L2b	1967	Asia	China	No Transposon	0	No Integron	0	IncFII(S)_1, ColpVC_1	2	PHAGE_Phage_Gifsy_2_NC_010393(30), PHAGE_Entero_ST104_NC_005841(47), PHAGE_Shigel_SfIV_NC_022749(2), PHAGE_Salmon_SJ46_NC_031129(3), PHAGE_Ralsto_Rs551_NC_047765(1), PHAGE_Klebsi_4LV2017_NC_047818(18), PHAGE_Escher_500465_2_NC_049343(4)	7
SAL00733	L2b	2015	Asia	China	No Transposon	0	No Integron	0	IncFII(S)_1, ColpVC_1	2	PHAGE_Escher_500465_1_NC_049342(25), PHAGE_Escher_500465_2_NC_049343(4), PHAGE_Phage_Gifsy_2_NC_010393(31), PHAGE_Entero_mEp237_NC_019704(3), PHAGE_Entero_ST104_NC_005841(49), PHAGE_Salmon_SJ46_NC_031129(3)	6
XXB1092	L2b	2011	Asia	China	Tn801	1	No Integron	0	IncFII(S)_1, IncX1_1, ColpVC_1	3	PHAGE_Phage_Gifsy_2_NC_010393(32), PHAGE_Salmon_SJ46_NC_031129(3), PHAGE_Salmon_SJ46_NC_031129(6), PHAGE_Shigel_SfIV_NC_022749(2), PHAGE_Escher_500465_2_NC_049343(4)	5
SAL03326	L3c	2015	Asia	China	Tn1721, Tn801	2	In498	1	IncX1_1, IncFII(S)_1, IncFIB(S)_1, ColpVC_1, IncN_1	5	PHAGE_Shigel_SfIV_NC_022749(2), PHAGE_Entero_ST104_NC_005841(48), PHAGE_Escher_500465_2_NC_049343(4), PHAGE_Escher_pro483_NC_028943(26), PHAGE_Entero_BP_4795_NC_004813(1), PHAGE_Salmon_SJ46_NC_031129(6), PHAGE_Salmon_118970_sal3_NC_031940(57), PHAGE_Burkho_BcepMu_NC_005882(2), PHAGE_Salmon_SJ46_NC_031129(3), PHAGE_Phage_Gifsy_2_NC_010393(31)	10
SAL04093	L3c	2019	Asia	China	Tn801	1	No Integron	0	IncFII(S)_1, IncX1_1, ColpVC_1	3	PHAGE_Shigel_SfIV_NC_022749(2), PHAGE_Entero_ST104_NC_005841(51), PHAGE_Escher_500465_2_NC_049343(4), PHAGE_Escher_pro483_NC_028943(27), PHAGE_Burkho_BcepMu_NC_005882(2), PHAGE_Salmon_SJ46_NC_031129(3), PHAGE_Salmon_SJ46_NC_031129(6), PHAGE_Phage_Gifsy_2_NC_010393(32)	8
SAL04092	L3c	2019	Asia	China	Tn801	1	No Integron	0	IncFII(S)_1, IncX1_1, ColpVC_1	3	PHAGE_Entero_ST104_NC_005841(47), PHAGE_Shigel_SfIV_NC_022749(2), PHAGE_Escher_500465_2_NC_049343(4), PHAGE_Escher_pro483_NC_028943(27), PHAGE_Salmon_SJ46_NC_031129(3), PHAGE_Salmon_SJ46_NC_031129(6), PHAGE_Phage_Gifsy_2_NC_010393(32)	7
SAL03440	L3c	2012	Asia	China	Tn1721, Tn801	2	No Integron	0	IncFII(S)_1, IncX1_1, ColpVC_1	3	PHAGE_Shigel_SfIV_NC_022749(2), PHAGE_Entero_ST104_NC_005841(51), PHAGE_Escher_500465_2_NC_049343(4), PHAGE_Escher_pro483_NC_028943(26), PHAGE_Salmon_SJ46_NC_031129(3), PHAGE_Salmon_SJ46_NC_031129(6), PHAGE_Phage_Gifsy_2_NC_010393(32)	7
SAL03330	L3c	2015	Asia	China	Tn1721, Tn801	2	No Integron	0	IncFII(S)_1, IncX1_1, ColpVC_1	3	PHAGE_Shigel_SfIV_NC_022749(2), PHAGE_Entero_ST104_NC_005841(51), PHAGE_Escher_500465_2_NC_049343(4), PHAGE_Escher_pro483_NC_028943(26), PHAGE_Burkho_BcepMu_NC_005882(2), PHAGE_Salmon_SJ46_NC_031129(3), PHAGE_Salmon_SJ46_NC_031129(6), PHAGE_Phage_Gifsy_2_NC_010393(32)	8
TH254	L3c	2022	Asia	China	Tn801	1	No Integron	0	IncFII(S)_1, IncX1_1, ColpVC_1	3	PHAGE_Entero_ST104_NC_005841(47), PHAGE_Shigel_SfIV_NC_022749(2), PHAGE_Escher_500465_2_NC_049343(4), PHAGE_Escher_pro483_NC_028943(26), PHAGE_Burkho_phiE255_NC_009237(2), PHAGE_Salmon_SJ46_NC_031129(3), PHAGE_Salmon_SJ46_NC_031129(6), PHAGE_Phage_Gifsy_2_NC_010393(31)	8
SAL03328	L3c	2015	Asia	China	Tn1721, Tn801	2	No Integron	0	IncFII(S)_1, IncX1_1, ColpVC_1	3	PHAGE_Entero_ST104_NC_005841(47), PHAGE_Shigel_SfIV_NC_022749(2), PHAGE_Escher_500465_2_NC_049343(4), PHAGE_Escher_pro483_NC_028943(27), PHAGE_Burkho_BcepMu_NC_005882(2), PHAGE_Salmon_SJ46_NC_031129(3), PHAGE_Salmon_SJ46_NC_031129(6), PHAGE_Phage_Gifsy_2_NC_010393(32)	8
SAL03428	L3c	2012	Asia	China	Tn801	1	No Integron	0	IncFII(S)_1, IncX1_1, ColpVC_1	3	PHAGE_Entero_ST104_NC_005841(47), PHAGE_Shigel_SfIV_NC_022749(2), PHAGE_Escher_500465_2_NC_049343(4), PHAGE_Escher_pro483_NC_028943(27), PHAGE_Burkho_phiE255_NC_009237(2), PHAGE_Salmon_SJ46_NC_031129(3), PHAGE_Salmon_SJ46_NC_031129(6), PHAGE_Phage_Gifsy_2_NC_010393(32)	8
SAL03422	L3c	2013	Asia	China	Tn801	1	No Integron	0	IncFII(S)_1, IncX1_1, ColpVC_1	3	PHAGE_Shigel_SfIV_NC_022749(2), PHAGE_Entero_ST104_NC_005841(51), PHAGE_Escher_500465_2_NC_049343(4), PHAGE_Escher_pro483_NC_028943(27), PHAGE_Salmon_SJ46_NC_031129(3), PHAGE_Salmon_SJ46_NC_031129(6), PHAGE_Phage_Gifsy_2_NC_010393(32)	7
SAL04035	L3c	2017	Asia	China	Tn801, Tn1721	2	No Integron	0	IncFII(S)_1, IncX1_1, ColpVC_1	3	PHAGE_Entero_ST104_NC_005841(47), PHAGE_Shigel_SfIV_NC_022749(2), PHAGE_Escher_500465_2_NC_049343(4), PHAGE_Escher_pro483_NC_028943(27), PHAGE_Burkho_phiE255_NC_009237(2), PHAGE_Salmon_SJ46_NC_031129(3), PHAGE_Salmon_SJ46_NC_031129(6), PHAGE_Phage_Gifsy_2_NC_010393(32)	8
SAL03423	L3c	2018	Asia	China	Tn801	1	No Integron	0	IncFII(S)_1, IncX1_1, ColpVC_1	3	PHAGE_Entero_ST104_NC_005841(47), PHAGE_Shigel_SfIV_NC_022749(2), PHAGE_Escher_500465_2_NC_049343(4), PHAGE_Escher_pro483_NC_028943(26), PHAGE_Salmon_SJ46_NC_031129(3), PHAGE_Salmon_SJ46_NC_031129(6), PHAGE_Phage_Gifsy_2_NC_010393(32)	7
SAL02657	L3c	2018	Asia	China	Tn801	1	No Integron	0	IncFII(S)_1, IncX1_1, ColpVC_1	3	PHAGE_Entero_ST104_NC_005841(47), PHAGE_Shigel_SfIV_NC_022749(2), PHAGE_Escher_500465_2_NC_049343(4), PHAGE_Escher_pro483_NC_028943(27), PHAGE_Salmon_SJ46_NC_031129(3), PHAGE_Salmon_SJ46_NC_031129(6), PHAGE_Phage_Gifsy_2_NC_010393(32)	7
SAL_PA7759AA	L3c	2014	Asia	China	Tn801	1	No Integron	0	IncFII(S)_1, IncX1_1, ColpVC_1	3	PHAGE_Phage_Gifsy_2_NC_010393(31), PHAGE_Shigel_SfIV_NC_022749(2), PHAGE_Salmon_SJ46_NC_031129(3), PHAGE_Entero_ST104_NC_005841(48), PHAGE_Yersin_L_413C_NC_004745(18), PHAGE_Salmon_SJ46_NC_031129(6), PHAGE_Escher_500465_2_NC_049343(4)	7
SAL03421	L3c	2018	Asia	China	Tn801	1	No Integron	0	IncFII(S)_1, IncX1_1, ColpVC_1	3	PHAGE_Entero_ST104_NC_005841(47), PHAGE_Shigel_SfIV_NC_022749(2), PHAGE_Escher_500465_2_NC_049343(4), PHAGE_Escher_pro483_NC_028943(26), PHAGE_Salmon_SJ46_NC_031129(3), PHAGE_Salmon_SJ46_NC_031129(6), PHAGE_Phage_Gifsy_2_NC_010393(32)	7
SAL03309	L3c	2015	Asia	China	Tn801	1	No Integron	0	IncFII(S)_1, IncX1_1, ColpVC_1	3	PHAGE_Shigel_SfIV_NC_022749(2), PHAGE_Entero_ST104_NC_005841(51), PHAGE_Escher_500465_2_NC_049343(4), PHAGE_Escher_pro483_NC_028943(27), PHAGE_Salmon_SJ46_NC_031129(3), PHAGE_Salmon_SJ46_NC_031129(6), PHAGE_Phage_Gifsy_2_NC_010393(32)	7
SAL02702	L3c	2018	Asia	China	Tn801	1	No Integron	0	IncFII(S)_1, IncX1_1, ColpVC_1	3	PHAGE_Entero_ST104_NC_005841(47), PHAGE_Shigel_SfIV_NC_022749(2), PHAGE_Escher_500465_2_NC_049343(4), PHAGE_Burkho_BcepMu_NC_005882(2), PHAGE_Salmon_SJ46_NC_031129(3), PHAGE_Salmon_SJ46_NC_031129(6), PHAGE_Phage_Gifsy_2_NC_010393(32)	7
SAL03453	L3c	2016	Asia	China	Tn801, Tn1721	2	No Integron	0	IncFII(S)_1, IncX1_1, ColpVC_1	3	PHAGE_Shigel_SfIV_NC_022749(2), PHAGE_Entero_ST104_NC_005841(51), PHAGE_Escher_500465_2_NC_049343(4), PHAGE_Escher_pro483_NC_028943(26), PHAGE_Salmon_SJ46_NC_031129(3), PHAGE_Salmon_SJ46_NC_031129(6), PHAGE_Phage_Gifsy_2_NC_010393(32)	7
SAL03302	L3c	2015	Asia	China	Tn801	1	In282	1	IncFII(S)_1, IncX1_1, IncFIB(S)_1, ColpVC_1	4	PHAGE_Shigel_POCJ13_NC_025434(3), PHAGE_Entero_ST104_NC_005841(46), PHAGE_Shigel_SfIV_NC_022749(2), PHAGE_Escher_500465_2_NC_049343(4), PHAGE_Escher_pro483_NC_028943(27), PHAGE_Burkho_phiE255_NC_009237(2), PHAGE_Salmon_SJ46_NC_031129(3), PHAGE_Salmon_SJ46_NC_031129(6), PHAGE_Salmon_118970_sal3_NC_031940(57), PHAGE_Phage_Gifsy_2_NC_010393(31)	10
SAL04098	L3c	2017	Asia	China	Tn801	1	No Integron	0	IncFII(S)_1, IncX1_1, ColpVC_1	3	PHAGE_Shigel_SfIV_NC_022749(2), PHAGE_Entero_ST104_NC_005841(51), PHAGE_Escher_500465_2_NC_049343(4), PHAGE_Escher_pro483_NC_028943(27), PHAGE_Burkho_phiE255_NC_009237(2), PHAGE_Salmon_SJ46_NC_031129(3), PHAGE_Salmon_SJ46_NC_031129(6), PHAGE_Phage_Gifsy_2_NC_010393(32)	8
SAL00708	L3c	2014	Asia	China	Tn801	1	No Integron	0	IncFII(S)_1, IncX1_1, ColpVC_1	3	PHAGE_Phage_Gifsy_2_NC_010393(31), PHAGE_Shigel_SfIV_NC_022749(2), PHAGE_Escher_500465_2_NC_049343(4), PHAGE_Escher_pro483_NC_028943(26), PHAGE_Burkho_phiE255_NC_009237(2), PHAGE_Salmon_SJ46_NC_031129(3), PHAGE_Entero_ST104_NC_005841(49), PHAGE_Salmon_SJ46_NC_031129(6)	8
SAL03297	L3c	2015	Asia	China	Tn801	1	No Integron	0	IncFII(S)_1, IncX1_1, ColpVC_1	3	PHAGE_Shigel_SfIV_NC_022749(2), PHAGE_Entero_ST104_NC_005841(51), PHAGE_Escher_500465_2_NC_049343(4), PHAGE_Escher_pro483_NC_028943(26), PHAGE_Burkho_BcepMu_NC_005882(2), PHAGE_Salmon_SJ46_NC_031129(3), PHAGE_Salmon_SJ46_NC_031129(6), PHAGE_Phage_Gifsy_2_NC_010393(32)	8
SAL02676	L3c	2013	Asia	China	Tn801	1	No Integron	0	IncFII(S)_1, IncX1_1, ColpVC_1	3	PHAGE_Entero_ST104_NC_005841(47), PHAGE_Shigel_SfIV_NC_022749(2), PHAGE_Escher_500465_2_NC_049343(4), PHAGE_Escher_pro483_NC_028943(26), PHAGE_Salmon_SJ46_NC_031129(3), PHAGE_Salmon_SJ46_NC_031129(6), PHAGE_Phage_Gifsy_2_NC_010393(32)	7
SAL03397	L3c	2014	Asia	China	Tn801	1	No Integron	0	IncFII(S)_1, IncX1_1, ColpVC_1	3	PHAGE_Entero_ST104_NC_005841(47), PHAGE_Shigel_SfIV_NC_022749(2), PHAGE_Escher_500465_2_NC_049343(4), PHAGE_Escher_pro483_NC_028943(27), PHAGE_Burkho_BcepMu_NC_005882(2), PHAGE_Salmon_SJ46_NC_031129(3), PHAGE_Salmon_SJ46_NC_031129(6), PHAGE_Phage_Gifsy_2_NC_010393(32)	8
SAL03438	L3c	2012	Asia	China	Tn801	1	No Integron	0	IncFII(S)_1, IncX1_1, ColpVC_1	3	PHAGE_Entero_ST104_NC_005841(47), PHAGE_Shigel_SfIV_NC_022749(2), PHAGE_Escher_500465_2_NC_049343(4), PHAGE_Escher_pro483_NC_028943(27), PHAGE_Salmon_SJ46_NC_031129(3), PHAGE_Salmon_SJ46_NC_031129(6), PHAGE_Phage_Gifsy_2_NC_010393(32)	7
SAL03298	L3c	2015	Asia	China	Tn801, Tn1721	2	No Integron	0	IncFII(S)_1, IncX1_1, ColpVC_1	3	PHAGE_Shigel_SfIV_NC_022749(2), PHAGE_Entero_ST104_NC_005841(51), PHAGE_Escher_500465_2_NC_049343(4), PHAGE_Salmon_SJ46_NC_031129(3), PHAGE_Salmon_SJ46_NC_031129(6), PHAGE_Phage_Gifsy_2_NC_010393(32)	6
SAL02699	L3c	2018	Asia	China	Tn801	1	No Integron	0	IncFII(S)_1, IncX1_1, ColpVC_1	3	PHAGE_Shigel_SfIV_NC_022749(2), PHAGE_Entero_ST104_NC_005841(51), PHAGE_Escher_500465_2_NC_049343(4), PHAGE_Escher_pro483_NC_028943(26), PHAGE_Salmon_SJ46_NC_031129(3), PHAGE_Salmon_SJ46_NC_031129(6), PHAGE_Phage_Gifsy_2_NC_010393(32)	7
SAL_PA7698AA	L3c	2008	Asia	China	Tn801	1	No Integron	0	IncFII(S)_1, IncX1_1, ColpVC_1	3	PHAGE_Salmon_SJ46_NC_031129(6), PHAGE_Escher_500465_2_NC_049343(4), PHAGE_Escher_pro483_NC_028943(26), PHAGE_Salmon_SJ46_NC_031129(3), PHAGE_Shigel_SfIV_NC_022749(2), PHAGE_Phage_Gifsy_2_NC_010393(31), PHAGE_Entero_ST104_NC_005841(49)	7
SAL04102	L3c	2017	Asia	China	Tn1721, Tn801	2	No Integron	0	IncFII(S)_1, IncX1_1, ColpVC_1	3	PHAGE_Entero_ST104_NC_005841(47), PHAGE_Shigel_SfIV_NC_022749(2), PHAGE_Escher_500465_2_NC_049343(4), PHAGE_Escher_pro483_NC_028943(26), PHAGE_Salmon_SJ46_NC_031129(3), PHAGE_Salmon_SJ46_NC_031129(6), PHAGE_Phage_Gifsy_2_NC_010393(32)	7
SAL04100	L3c	2017	Asia	China	Tn1721, Tn801	2	No Integron	0	IncFII(S)_1, IncX1_1, ColpVC_1	3	PHAGE_Shigel_SfIV_NC_022749(2), PHAGE_Entero_ST104_NC_005841(51), PHAGE_Escher_500465_2_NC_049343(4), PHAGE_Escher_pro483_NC_028943(26), PHAGE_Salmon_SJ46_NC_031129(3), PHAGE_Salmon_SJ46_NC_031129(6), PHAGE_Phage_Gifsy_2_NC_010393(32)	7
SAL02664	L3c	2018	Asia	China	Tn801	1	No Integron	0	IncFII(S)_1, IncX1_1, ColpVC_1	3	PHAGE_Entero_ST104_NC_005841(47), PHAGE_Shigel_SfIV_NC_022749(2), PHAGE_Escher_pro483_NC_028943(27), PHAGE_Salmon_SJ46_NC_031129(3), PHAGE_Salmon_SJ46_NC_031129(6), PHAGE_Phage_Gifsy_2_NC_010393(32)	6
TH256	L3c	2022	Asia	China	Tn801	1	No Integron	0	IncFII(S)_1, IncX1_1, ColpVC_1, ColpVC_1	4	PHAGE_Shigel_SfIV_NC_022749(2), PHAGE_Entero_ST104_NC_005841(51), PHAGE_Escher_500465_2_NC_049343(4), PHAGE_Escher_pro483_NC_028943(26), PHAGE_Salmon_SJ46_NC_031129(3), PHAGE_Salmon_SJ46_NC_031129(6), PHAGE_Phage_Gifsy_2_NC_010393(30)	7
SAL02681	L3c	2013	Asia	China	Tn801	1	No Integron	0	IncFII(S)_1, IncX1_1, ColpVC_1	3	PHAGE_Shigel_SfIV_NC_022749(2), PHAGE_Entero_ST104_NC_005841(51), PHAGE_Escher_500465_2_NC_049343(4), PHAGE_Escher_pro483_NC_028943(26), PHAGE_Salmon_SJ46_NC_031129(3), PHAGE_Salmon_SJ46_NC_031129(6), PHAGE_Phage_Gifsy_2_NC_010393(32)	7
SAL04017	L3c	2017	Asia	China	Tn801	1	No Integron	0	IncFII(S)_1, IncX1_1, ColpVC_1	3	PHAGE_Entero_ST104_NC_005841(47), PHAGE_Shigel_SfIV_NC_022749(2), PHAGE_Escher_500465_2_NC_049343(4), PHAGE_Escher_pro483_NC_028943(26), PHAGE_Salmon_SJ46_NC_031129(3), PHAGE_Salmon_SJ46_NC_031129(6), PHAGE_Phage_Gifsy_2_NC_010393(32)	7
SAL_PA7730AA	L3c	2014	Asia	China	Tn801	1	No Integron	0	IncFII(S)_1, IncX1_1, ColpVC_1	3	PHAGE_Entero_ST104_NC_005841(49), PHAGE_Shigel_SfIV_NC_022749(2), PHAGE_Salmon_SJ46_NC_031129(6), PHAGE_Escher_pro483_NC_028943(26), PHAGE_Phage_Gifsy_2_NC_010393(31), PHAGE_Escher_500465_2_NC_049343(4), PHAGE_Salmon_SJ46_NC_031129(3)	7
SAL03435	L3c	2009	Asia	China	Tn801	1	No Integron	0	IncFII(S)_1, IncX1_1, ColpVC_1	3	PHAGE_Shigel_SfIV_NC_022749(2), PHAGE_Entero_ST104_NC_005841(51), PHAGE_Escher_500465_2_NC_049343(4), PHAGE_Escher_pro483_NC_028943(27), PHAGE_Burkho_phiE255_NC_009237(2), PHAGE_Salmon_SJ46_NC_031129(3), PHAGE_Salmon_SJ46_NC_031129(6), PHAGE_Phage_Gifsy_2_NC_010393(32)	8
SAL03296	L3c	2015	Asia	China	Tn801, Tn1721	2	No Integron	0	IncFII(S)_1, IncX1_1, ColpVC_1	3	PHAGE_Entero_ST104_NC_005841(47), PHAGE_Shigel_SfIV_NC_022749(2), PHAGE_Escher_500465_2_NC_049343(4), PHAGE_Escher_pro483_NC_028943(26), PHAGE_Salmon_SJ46_NC_031129(3), PHAGE_Salmon_SJ46_NC_031129(6), PHAGE_Phage_Gifsy_2_NC_010393(32)	7
SAL03408	L3c	2018	Asia	China	Tn801	1	No Integron	0	IncFII(S)_1, IncX1_1, ColpVC_1	3	PHAGE_Entero_ST104_NC_005841(47), PHAGE_Shigel_SfIV_NC_022749(2), PHAGE_Escher_500465_2_NC_049343(4), PHAGE_Escher_pro483_NC_028943(27), PHAGE_Salmon_SJ46_NC_031129(3), PHAGE_Salmon_SJ46_NC_031129(6), PHAGE_Phage_Gifsy_2_NC_010393(32)	7
SAL00717	L3c	2014	Asia	China	Tn801, Tn1721	2	No Integron	0	IncFII(S)_1, IncX1_1, ColpVC_1	3	PHAGE_Salmon_BTP1_NC_042346(2), PHAGE_Escher_500465_2_NC_049343(4), PHAGE_Shigel_SfIV_NC_022749(2), PHAGE_Escher_pro483_NC_028943(27), PHAGE_Salmon_SJ46_NC_031129(3), PHAGE_Salmon_SJ46_NC_031129(6), PHAGE_Entero_ST104_NC_005841(49), PHAGE_Phage_Gifsy_2_NC_010393(30)	8
SAL00734	L3c	2016	Asia	China	Tn801, Tn1721	2	No Integron	0	IncFII(S)_1, IncX1_1, ColpVC_1	3	PHAGE_Shigel_SfIV_NC_022749(2), PHAGE_Escher_500465_2_NC_049343(4), PHAGE_Escher_pro483_NC_028943(27), PHAGE_Phage_Gifsy_2_NC_010393(29), PHAGE_Entero_mEp237_NC_019704(3), PHAGE_Entero_ST104_NC_005841(49), PHAGE_Salmon_SJ46_NC_031129(3), PHAGE_Salmon_SJ46_NC_031129(6)	8
SAL02654	L3c	2018	Asia	China	Tn801, Tn1721	2	No Integron	0	IncFII(S)_1, IncX1_1, ColpVC_1	3	PHAGE_Shigel_SfIV_NC_022749(2), PHAGE_Entero_ST104_NC_005841(51), PHAGE_Escher_500465_2_NC_049343(4), PHAGE_Burkho_BcepMu_NC_005882(2), PHAGE_Salmon_SJ46_NC_031129(3), PHAGE_Salmon_SJ46_NC_031129(6), PHAGE_Phage_Gifsy_2_NC_010393(32)	7
SAL03415	L3c	2018	Asia	China	Tn801, Tn1721	2	No Integron	0	IncFII(S)_1, IncX1_1, ColpVC_1	3	PHAGE_Entero_ST104_NC_005841(47), PHAGE_Shigel_SfIV_NC_022749(2), PHAGE_Escher_500465_2_NC_049343(4), PHAGE_Escher_pro483_NC_028943(26), PHAGE_Salmon_SJ46_NC_031129(3), PHAGE_Salmon_SJ46_NC_031129(6), PHAGE_Phage_Gifsy_2_NC_010393(32)	7
SAL02674	L3c	2013	Asia	China	Tn801	1	No Integron	0	IncFII(S)_1, IncX1_1, ColpVC_1	3	PHAGE_Entero_ST104_NC_005841(47), PHAGE_Shigel_SfIV_NC_022749(2), PHAGE_Escher_500465_2_NC_049343(4), PHAGE_Escher_pro483_NC_028943(26), PHAGE_Burkho_BcepMu_NC_005882(2), PHAGE_Salmon_SJ46_NC_031129(3), PHAGE_Salmon_SJ46_NC_031129(6), PHAGE_Phage_Gifsy_2_NC_010393(32)	8
SAL04101	L3c	2017	Asia	China	Tn1721, Tn801	2	No Integron	0	IncFII(S)_1, IncX1_1, ColpVC_1	3	PHAGE_Shigel_SfIV_NC_022749(2), PHAGE_Entero_ST104_NC_005841(51), PHAGE_Escher_500465_2_NC_049343(4), PHAGE_Escher_pro483_NC_028943(26), PHAGE_Salmon_SJ46_NC_031129(3), PHAGE_Salmon_SJ46_NC_031129(6), PHAGE_Phage_Gifsy_2_NC_010393(32)	7
SAL02661	L3c	2018	Asia	China	Tn801, Tn1721	2	No Integron	0	IncFII(S)_1, IncX1_1, ColpVC_1	3	PHAGE_Shigel_SfIV_NC_022749(2), PHAGE_Entero_ST104_NC_005841(51), PHAGE_Escher_500465_2_NC_049343(4), PHAGE_Burkho_BcepMu_NC_005882(2), PHAGE_Salmon_SJ46_NC_031129(3), PHAGE_Salmon_SJ46_NC_031129(6), PHAGE_Phage_Gifsy_2_NC_010393(32)	7
SAL04018	L3c	2017	Asia	China	Tn801	1	No Integron	0	IncFII(S)_1, IncX1_1, ColpVC_1	3	PHAGE_Shigel_SfIV_NC_022749(2), PHAGE_Entero_ST104_NC_005841(51), PHAGE_Escher_500465_2_NC_049343(4), PHAGE_Escher_pro483_NC_028943(26), PHAGE_Salmon_SJ46_NC_031129(3), PHAGE_Salmon_SJ46_NC_031129(6), PHAGE_Phage_Gifsy_2_NC_010393(32)	7
SAL02700	L3c	2018	Asia	China	Tn801	1	No Integron	0	IncFII(S)_1, IncX1_1, ColpVC_1	3	PHAGE_Shigel_SfIV_NC_022749(2), PHAGE_Entero_ST104_NC_005841(51), PHAGE_Escher_500465_2_NC_049343(4), PHAGE_Escher_pro483_NC_028943(27), PHAGE_Burkho_BcepMu_NC_005882(2), PHAGE_Salmon_SJ46_NC_031129(3), PHAGE_Salmon_SJ46_NC_031129(6), PHAGE_Phage_Gifsy_2_NC_010393(32)	8
SAL03419	L3c	2018	Asia	China	Tn801, Tn1721	2	No Integron	0	IncFII(S)_1, IncX1_1, ColpVC_1	3	PHAGE_Entero_ST104_NC_005841(47), PHAGE_Shigel_SfIV_NC_022749(2), PHAGE_Escher_500465_2_NC_049343(4), PHAGE_Burkho_BcepMu_NC_005882(2), PHAGE_Salmon_SJ46_NC_031129(3), PHAGE_Salmon_SJ46_NC_031129(6), PHAGE_Phage_Gifsy_2_NC_010393(32)	7
SAL03413	L3c	2018	Asia	China	Tn801	1	No Integron	0	IncFII(S)_1, IncX1_1, ColpVC_1	3	PHAGE_Entero_ST104_NC_005841(47), PHAGE_Shigel_SfIV_NC_022749(2), PHAGE_Escher_500465_2_NC_049343(4), PHAGE_Escher_pro483_NC_028943(27), PHAGE_Salmon_SJ46_NC_031129(3), PHAGE_Salmon_SJ46_NC_031129(6), PHAGE_Phage_Gifsy_2_NC_010393(32)	7
SAL02675	L3c	2013	Asia	China	Tn801	1	No Integron	0	IncFII(S)_1, IncX1_1, ColpVC_1	3	PHAGE_Entero_ST104_NC_005841(47), PHAGE_Shigel_SfIV_NC_022749(2), PHAGE_Escher_500465_2_NC_049343(4), PHAGE_Escher_pro483_NC_028943(27), PHAGE_Burkho_BcepMu_NC_005882(2), PHAGE_Salmon_SJ46_NC_031129(3), PHAGE_Salmon_SJ46_NC_031129(6), PHAGE_Phage_Gifsy_2_NC_010393(32)	8
SAL03448	L3c	2013	Asia	China	Tn801	1	No Integron	0	IncFII(S)_1, IncX1_1, ColpVC_1	3	PHAGE_Shigel_SfIV_NC_022749(2), PHAGE_Entero_ST104_NC_005841(51), PHAGE_Escher_500465_2_NC_049343(4), PHAGE_Salmon_SJ46_NC_031129(3), PHAGE_Salmon_SJ46_NC_031129(6), PHAGE_Phage_Gifsy_2_NC_010393(32)	6
SAL03403	L3c	2014	Asia	China	Tn801	1	No Integron	0	IncFII(S)_1, IncX1_1, ColpVC_1	3	PHAGE_Shigel_SfIV_NC_022749(2), PHAGE_Entero_ST104_NC_005841(51), PHAGE_Escher_500465_2_NC_049343(4), PHAGE_Escher_pro483_NC_028943(27), PHAGE_Salmon_SJ46_NC_031129(3), PHAGE_Salmon_SJ46_NC_031129(6), PHAGE_Phage_Gifsy_2_NC_010393(32)	7
SAL00746	L3c	2017	Asia	China	Tn801	1	No Integron	0	IncFII(S)_1, IncX1_1, ColpVC_1	3	PHAGE_Shigel_SfIV_NC_022749(2), PHAGE_Entero_ST104_NC_005841(51), PHAGE_Escher_500465_2_NC_049343(4), PHAGE_Escher_pro483_NC_028943(27), PHAGE_Escher_RCS47_NC_042128(2), PHAGE_Salmon_SJ46_NC_031129(6), PHAGE_Phage_Gifsy_2_NC_010393(32)	7
SAL04020	L3c	2017	Asia	China	Tn801	1	No Integron	0	IncFII(S)_1, IncX1_1, ColpVC_1	3	PHAGE_Entero_ST104_NC_005841(47), PHAGE_Shigel_SfIV_NC_022749(2), PHAGE_Escher_500465_2_NC_049343(4), PHAGE_Escher_pro483_NC_028943(26), PHAGE_Burkho_phiE255_NC_009237(2), PHAGE_Salmon_SJ46_NC_031129(3), PHAGE_Salmon_SJ46_NC_031129(6), PHAGE_Phage_Gifsy_2_NC_010393(32)	8
SAL03593	L3c	2019	Asia	China	Tn801	1	No Integron	0	IncFII(S)_1, IncX1_1, ColpVC_1	3	PHAGE_Shigel_SfIV_NC_022749(2), PHAGE_Entero_ST104_NC_005841(51), PHAGE_Escher_500465_2_NC_049343(4), PHAGE_Burkho_BcepMu_NC_005882(2), PHAGE_Salmon_SJ46_NC_031129(6), PHAGE_Phage_Gifsy_2_NC_010393(32)	6
SAL02651	L3c	2018	Asia	China	Tn801	1	No Integron	0	IncFII(S)_1, IncX1_1, ColpVC_1	3	PHAGE_Shigel_SfIV_NC_022749(2), PHAGE_Entero_ST104_NC_005841(51), PHAGE_Escher_500465_2_NC_049343(4), PHAGE_Burkho_phiE255_NC_009237(2), PHAGE_Salmon_SJ46_NC_031129(3), PHAGE_Salmon_SJ46_NC_031129(6), PHAGE_Phage_Gifsy_2_NC_010393(32)	7
SAL03294	L3c	2015	Asia	China	Tn801, Tn1721	2	No Integron	0	IncFII(S)_1, IncX1_1, IncFIB(S)_1, ColpVC_1	4	PHAGE_Shigel_SfIV_NC_022749(2), PHAGE_Entero_ST104_NC_005841(48), PHAGE_Escher_500465_2_NC_049343(4), PHAGE_Shigel_POCJ13_NC_025434(3), PHAGE_Escher_pro483_NC_028943(26), PHAGE_Burkho_phiE255_NC_009237(2), PHAGE_Salmon_SJ46_NC_031129(3), PHAGE_Salmon_SJ46_NC_031129(6), PHAGE_Salmon_118970_sal3_NC_031940(57), PHAGE_Phage_Gifsy_2_NC_010393(31)	10
SAL03426	L3c	2011	Asia	China	Tn1721, Tn801	2	No Integron	0	IncFII(S)_1, IncX1_1, ColpVC_1	3	PHAGE_Shigel_SfIV_NC_022749(2), PHAGE_Entero_ST104_NC_005841(51), PHAGE_Escher_500465_2_NC_049343(4), PHAGE_Escher_pro483_NC_028943(26), PHAGE_Burkho_phiE255_NC_009237(2), PHAGE_Salmon_SJ46_NC_031129(3), PHAGE_Salmon_SJ46_NC_031129(6), PHAGE_Phage_Gifsy_2_NC_010393(32)	8
SAL02652	L3c	2018	Asia	China	Tn801, Tn1721	2	No Integron	0	IncFII(S)_1, IncX1_1, ColpVC_1	3	PHAGE_Shigel_SfIV_NC_022749(2), PHAGE_Entero_ST104_NC_005841(51), PHAGE_Escher_500465_2_NC_049343(4), PHAGE_Salmon_SJ46_NC_031129(3), PHAGE_Salmon_SJ46_NC_031129(6), PHAGE_Phage_Gifsy_2_NC_010393(32)	6
SAL03295	L3c	2015	Asia	China	Tn801, Tn1721	2	No Integron	0	IncFII(S)_1, IncX1_1, ColpVC_1	3	PHAGE_Shigel_SfIV_NC_022749(2), PHAGE_Entero_ST104_NC_005841(51), PHAGE_Escher_500465_2_NC_049343(4), PHAGE_Escher_pro483_NC_028943(27), PHAGE_Burkho_phiE255_NC_009237(2), PHAGE_Salmon_SJ46_NC_031129(3), PHAGE_Salmon_SJ46_NC_031129(6), PHAGE_Phage_Gifsy_2_NC_010393(32)	8
SAL03433	L3c	2014	Asia	China	Tn801	1	No Integron	0	IncFII(S)_1, IncX1_1, ColpVC_1	3	PHAGE_Shigel_SfIV_NC_022749(2), PHAGE_Entero_ST104_NC_005841(51), PHAGE_Escher_500465_2_NC_049343(4), PHAGE_Escher_pro483_NC_028943(27), PHAGE_Burkho_phiE255_NC_009237(2), PHAGE_Salmon_SJ46_NC_031129(3), PHAGE_Salmon_SJ46_NC_031129(6), PHAGE_Phage_Gifsy_2_NC_010393(32)	8
SAL03432	L3c	2014	Asia	China	Tn801	1	No Integron	0	IncFII(S)_1, IncX1_1, ColpVC_1	3	PHAGE_Entero_ST104_NC_005841(47), PHAGE_Shigel_SfIV_NC_022749(2), PHAGE_Escher_500465_2_NC_049343(4), PHAGE_Escher_pro483_NC_028943(27), PHAGE_Burkho_phiE255_NC_009237(2), PHAGE_Salmon_SJ46_NC_031129(3), PHAGE_Salmon_SJ46_NC_031129(6), PHAGE_Phage_Gifsy_2_NC_010393(32)	8
TH260	L3c	2022	Asia	China	Tn801	1	No Integron	0	IncFII(S)_1, IncX1_1, ColpVC_1	3	PHAGE_Entero_ST104_NC_005841(47), PHAGE_Shigel_SfIV_NC_022749(2), PHAGE_Escher_500465_2_NC_049343(4), PHAGE_Escher_pro483_NC_028943(26), PHAGE_Burkho_phiE255_NC_009237(2), PHAGE_Salmon_SJ46_NC_031129(3), PHAGE_Salmon_SJ46_NC_031129(6), PHAGE_Phage_Gifsy_2_NC_010393(31)	8
C15_FKDN220483769-1A_H25LVDSX5_L3	L3c	2020	Asia	China	Tn801	1	No Integron	0	IncFII(S)_1, IncX1_1, ColpVC_1	3	PHAGE_Shigel_SfIV_NC_022749(2), PHAGE_Entero_ST104_NC_005841(51), PHAGE_Escher_500465_2_NC_049343(4), PHAGE_Escher_pro483_NC_028943(27), PHAGE_Burkho_BcepMu_NC_005882(2), PHAGE_Salmon_SJ46_NC_031129(3), PHAGE_Salmon_SJ46_NC_031129(6), PHAGE_Phage_Gifsy_2_NC_010393(30)	8
SAL00718	L3c	2014	Asia	China	Tn801	1	No Integron	0	IncFII(S)_1, IncX1_1, ColpVC_1	3	PHAGE_Phage_Gifsy_2_NC_010393(32), PHAGE_Shigel_SfIV_NC_022749(2), PHAGE_Escher_500465_2_NC_049343(4), PHAGE_Escher_pro483_NC_028943(26), PHAGE_Entero_ST104_NC_005841(49), PHAGE_Salmon_SJ46_NC_031129(3), PHAGE_Salmon_SJ46_NC_031129(6)	7
SAL04099	L3c	2017	Asia	China	Tn801	1	No Integron	0	IncFII(S)_1, IncX1_1, ColpVC_1	3	PHAGE_Shigel_SfIV_NC_022749(2), PHAGE_Entero_ST104_NC_005841(51), PHAGE_Escher_500465_2_NC_049343(4), PHAGE_Escher_pro483_NC_028943(27), PHAGE_Burkho_phiE255_NC_009237(2), PHAGE_Salmon_SJ46_NC_031129(3), PHAGE_Salmon_SJ46_NC_031129(6), PHAGE_Phage_Gifsy_2_NC_010393(32)	8
SAL_GB9917AA	L3c	2017	Asia	China	Tn801	1	No Integron	0	IncX1_1, IncFII(S)_1	2	PHAGE_Escher_pro483_NC_028943(27), PHAGE_Escher_500465_2_NC_049343(4), PHAGE_Phage_Gifsy_2_NC_010393(31), PHAGE_Entero_mEp237_NC_019704(3), PHAGE_Shigel_SfIV_NC_022749(2), PHAGE_Entero_ST104_NC_005841(48), PHAGE_Salmon_SJ46_NC_031129(6), PHAGE_Salmon_SJ46_NC_031129(3)	8
SAL02662	L3c	2018	Asia	China	Tn801	1	No Integron	0	IncFII(S)_1, IncX1_1, ColpVC_1	3	PHAGE_Entero_ST104_NC_005841(47), PHAGE_Shigel_SfIV_NC_022749(2), PHAGE_Escher_500465_2_NC_049343(4), PHAGE_Escher_pro483_NC_028943(27), PHAGE_Salmon_SJ46_NC_031129(3), PHAGE_Salmon_SJ46_NC_031129(6), PHAGE_Phage_Gifsy_2_NC_010393(32)	7
SAL03429	L3c	2012	Asia	China	Tn801	1	No Integron	0	IncFII(S)_1, IncX1_1, ColpVC_1	3	PHAGE_Entero_ST104_NC_005841(47), PHAGE_Shigel_SfIV_NC_022749(2), PHAGE_Escher_500465_2_NC_049343(4), PHAGE_Escher_pro483_NC_028943(26), PHAGE_Salmon_SJ46_NC_031129(3), PHAGE_Salmon_SJ46_NC_031129(6), PHAGE_Phage_Gifsy_2_NC_010393(32)	7
SAL03314	L3c	2014	Asia	China	Tn801, Tn1721	2	No Integron	0	IncFII(S)_1, IncX1_1, IncFIB(S)_1, ColpVC_1	4	PHAGE_Entero_ST104_NC_005841(46), PHAGE_Shigel_SfIV_NC_022749(2), PHAGE_Escher_500465_2_NC_049343(4), PHAGE_Shigel_POCJ13_NC_025434(3), PHAGE_Escher_pro483_NC_028943(27), PHAGE_Burkho_phiE255_NC_009237(2), PHAGE_Salmon_SJ46_NC_031129(3), PHAGE_Salmon_SJ46_NC_031129(6), PHAGE_Salmon_118970_sal3_NC_031940(57), PHAGE_Phage_Gifsy_2_NC_010393(31)	10
SAL_PA7696AA	L3c	2009	Asia	China	Tn801	1	No Integron	0	IncFII(S)_1, IncX1_1, ColpVC_1	3	PHAGE_Salmon_SJ46_NC_031129(6), PHAGE_Phage_Gifsy_2_NC_010393(30), PHAGE_Escher_500465_2_NC_049343(4), PHAGE_Shigel_SfIV_NC_022749(2), PHAGE_Entero_ST104_NC_005841(51), PHAGE_Escher_pro483_NC_028943(27), PHAGE_Salmon_SJ46_NC_031129(3)	7
ERS2630811	L3c	2014	Asia	China	Tn801, Tn1721	2	No Integron	0	IncFII(S)_1, IncX1_1, ColpVC_1	3	PHAGE_Shigel_SfIV_NC_022749(2), PHAGE_Entero_ST104_NC_005841(51), PHAGE_Escher_500465_2_NC_049343(4), PHAGE_Escher_pro483_NC_028943(27), PHAGE_Burkho_BcepMu_NC_005882(2), PHAGE_Salmon_SJ46_NC_031129(3), PHAGE_Salmon_SJ46_NC_031129(6), PHAGE_Phage_Gifsy_2_NC_010393(32)	8
SAL03407	L3c	2018	Asia	China	Tn801, Tn1721	2	No Integron	0	IncFII(S)_1, IncX1_1, ColpVC_1	3	PHAGE_Entero_ST104_NC_005841(47), PHAGE_Shigel_SfIV_NC_022749(2), PHAGE_Escher_500465_2_NC_049343(4), PHAGE_Escher_pro483_NC_028943(26), PHAGE_Burkho_phiE255_NC_009237(2), PHAGE_Salmon_SJ46_NC_031129(3), PHAGE_Salmon_SJ46_NC_031129(6), PHAGE_Phage_Gifsy_2_NC_010393(32)	8
SAL03431	L3c	2012	Asia	China	Tn1721, Tn801	2	No Integron	0	IncFII(S)_1, IncX1_1, ColpVC_1	3	PHAGE_Shigel_SfIV_NC_022749(2), PHAGE_Entero_ST104_NC_005841(51), PHAGE_Escher_500465_2_NC_049343(4), PHAGE_Escher_pro483_NC_028943(26), PHAGE_Salmon_SJ46_NC_031129(3), PHAGE_Salmon_SJ46_NC_031129(6), PHAGE_Phage_Gifsy_2_NC_010393(32)	7
SAL03329	L3c	2015	Asia	China	Tn1721, Tn801	2	No Integron	0	IncX1_1, IncFII(S)_1, IncFIB(S)_1, ColpVC_1	4	PHAGE_Shigel_SfIV_NC_022749(2), PHAGE_Shigel_POCJ13_NC_025434(3), PHAGE_Escher_500465_2_NC_049343(4), PHAGE_Salmon_SJ46_NC_031129(6), PHAGE_Entero_ST104_NC_005841(51), PHAGE_Salmon_118970_sal3_NC_031940(57), PHAGE_Salmon_SJ46_NC_031129(3), PHAGE_Yersin_L_413C_NC_004745(18)	8
SAL03325	L3c	2015	Asia	China	Tn801	1	No Integron	0	IncX1_1, IncFII(S)_1, IncFIB(S)_1, ColpVC_1	4	PHAGE_Shigel_POCJ13_NC_025434(3), PHAGE_Entero_ST104_NC_005841(47), PHAGE_Shigel_SfIV_NC_022749(2), PHAGE_Escher_500465_2_NC_049343(4), PHAGE_Escher_pro483_NC_028943(27), PHAGE_Salmon_SJ46_NC_031129(6), PHAGE_Salmon_118970_sal3_NC_031940(57), PHAGE_Salmon_SJ46_NC_031129(3), PHAGE_Phage_Gifsy_2_NC_010393(31)	9
SAL_PA7701AA	L3c	2014	Asia	China	Tn801	1	No Integron	0	IncFII(S)_1, IncX1_1, ColpVC_1	3	PHAGE_Escher_500465_2_NC_049343(4), PHAGE_Salmon_SJ46_NC_031129(3), PHAGE_Shigel_SfIV_NC_022749(2), PHAGE_Entero_ST104_NC_005841(49), PHAGE_Salmon_SJ46_NC_031129(6), PHAGE_Escher_pro483_NC_028943(26), PHAGE_Phage_Gifsy_2_NC_010393(31)	7
SAL02663	L3c	2018	Asia	China	Tn801, Tn1721	2	No Integron	0	IncFII(S)_1, IncX1_1, ColpVC_1	3	PHAGE_Shigel_SfIV_NC_022749(2), PHAGE_Entero_ST104_NC_005841(51), PHAGE_Escher_500465_2_NC_049343(4), PHAGE_Burkho_phiE255_NC_009237(2), PHAGE_Salmon_SJ46_NC_031129(3), PHAGE_Salmon_SJ46_NC_031129(6), PHAGE_Phage_Gifsy_2_NC_010393(32)	7
SAL_PA7745AA	L3c	2014	Asia	China	Tn801	1	No Integron	0	IncFII(S)_1, IncX1_1, ColpVC_1	3	PHAGE_Escher_500465_2_NC_049343(4), PHAGE_Shigel_SfIV_NC_022749(2), PHAGE_Escher_pro483_NC_028943(26), PHAGE_Salmon_SJ46_NC_031129(6), PHAGE_Phage_Gifsy_2_NC_010393(31), PHAGE_Salmon_SJ46_NC_031129(3), PHAGE_Entero_ST104_NC_005841(49)	7
SAL03417	L3c	2018	Asia	China	Tn801	1	No Integron	0	IncFII(S)_1, IncX1_1, ColpVC_1	3	PHAGE_Shigel_SfIV_NC_022749(2), PHAGE_Entero_ST104_NC_005841(51), PHAGE_Escher_500465_2_NC_049343(4), PHAGE_Escher_pro483_NC_028943(27), PHAGE_Salmon_SJ46_NC_031129(3), PHAGE_Salmon_SJ46_NC_031129(6), PHAGE_Phage_Gifsy_2_NC_010393(32)	7
SAL03416	L3c	2018	Asia	China	Tn801	1	No Integron	0	IncFII(S)_1, IncX1_1, ColpVC_1	3	PHAGE_Entero_ST104_NC_005841(47), PHAGE_Shigel_SfIV_NC_022749(2), PHAGE_Escher_500465_2_NC_049343(4), PHAGE_Escher_pro483_NC_028943(27), PHAGE_Salmon_SJ46_NC_031129(3), PHAGE_Salmon_SJ46_NC_031129(6), PHAGE_Phage_Gifsy_2_NC_010393(32)	7
SAL03615	L3c	2020	Asia	China	Tn1721, Tn801	2	No Integron	0	IncFII(S)_1, IncX1_1, ColpVC_1	3	PHAGE_Shigel_SfIV_NC_022749(2), PHAGE_Entero_ST104_NC_005841(51), PHAGE_Escher_500465_2_NC_049343(4), PHAGE_Escher_pro483_NC_028943(27), PHAGE_Salmon_SJ46_NC_031129(3), PHAGE_Salmon_SJ46_NC_031129(6), PHAGE_Phage_Gifsy_2_NC_010393(32)	7
SAL03434	L3c	2009	Asia	China	Tn801	1	No Integron	0	IncFII(S)_1, IncX1_1, ColpVC_1	3	PHAGE_Entero_ST104_NC_005841(47), PHAGE_Shigel_SfIV_NC_022749(2), PHAGE_Escher_500465_2_NC_049343(4), PHAGE_Escher_pro483_NC_028943(27), PHAGE_Burkho_phiE255_NC_009237(2), PHAGE_Salmon_SJ46_NC_031129(3), PHAGE_Salmon_SJ46_NC_031129(6), PHAGE_Phage_Gifsy_2_NC_010393(32)	8
TH261	L3c	2022	Asia	China	Tn801	1	No Integron	0	IncFII(S)_1, IncX1_1, ColpVC_1	3	PHAGE_Entero_ST104_NC_005841(47), PHAGE_Shigel_SfIV_NC_022749(2), PHAGE_Escher_500465_2_NC_049343(4), PHAGE_Escher_pro483_NC_028943(27), PHAGE_Burkho_phiE255_NC_009237(2), PHAGE_Salmon_SJ46_NC_031129(3), PHAGE_Salmon_SJ46_NC_031129(6), PHAGE_Phage_Gifsy_2_NC_010393(31)	8
SAL04097	L3c	2017	Asia	China	Tn801	1	No Integron	0	IncFII(S)_1, IncX1_1, ColpVC_1	3	PHAGE_Entero_ST104_NC_005841(47), PHAGE_Shigel_SfIV_NC_022749(2), PHAGE_Escher_500465_2_NC_049343(4), PHAGE_Escher_pro483_NC_028943(26), PHAGE_Burkho_BcepMu_NC_005882(2), PHAGE_Salmon_SJ46_NC_031129(3), PHAGE_Salmon_SJ46_NC_031129(6), PHAGE_Phage_Gifsy_2_NC_010393(32)	8
SAL03282	L3c	2015	Asia	China	Tn801	1	No Integron	0	IncFII(S)_1, IncX1_1, ColpVC_1	3	PHAGE_Shigel_SfIV_NC_022749(2), PHAGE_Entero_ST104_NC_005841(51), PHAGE_Escher_500465_2_NC_049343(4), PHAGE_Escher_pro483_NC_028943(27), PHAGE_Salmon_SJ46_NC_031129(3), PHAGE_Salmon_SJ46_NC_031129(6), PHAGE_Phage_Gifsy_2_NC_010393(32)	7
SAL03292	L3c	2015	Asia	China	Tn1721, Tn801	2	No Integron	0	IncFII(S)_1, IncX1_1, ColpVC_1	3	PHAGE_Shigel_SfIV_NC_022749(2), PHAGE_Entero_ST104_NC_005841(51), PHAGE_Escher_500465_2_NC_049343(4), PHAGE_Escher_pro483_NC_028943(27), PHAGE_Salmon_SJ46_NC_031129(3), PHAGE_Salmon_SJ46_NC_031129(6), PHAGE_Phage_Gifsy_2_NC_010393(32)	7
SAL04031	L3c	2017	Asia	China	Tn1721, Tn801	2	No Integron	0	IncFII(S)_1, IncX1_1, ColpVC_1	3	PHAGE_Shigel_SfIV_NC_022749(2), PHAGE_Entero_ST104_NC_005841(51), PHAGE_Escher_500465_2_NC_049343(4), PHAGE_Escher_pro483_NC_028943(26), PHAGE_Salmon_SJ46_NC_031129(3), PHAGE_Salmon_SJ46_NC_031129(6), PHAGE_Phage_Gifsy_2_NC_010393(32)	7
SAL_PA7686AA	L3c	2009	Asia	China	Tn801	1	No Integron	0	IncX1_1, IncFII(S)_1, ColpVC_1	3	PHAGE_Salmon_SJ46_NC_031129(3), PHAGE_Shigel_SfIV_NC_022749(2), PHAGE_Entero_ST104_NC_005841(51), PHAGE_Phage_Gifsy_2_NC_010393(30), PHAGE_Escher_500465_2_NC_049343(4), PHAGE_Escher_pro483_NC_028943(26), PHAGE_Salmon_SJ46_NC_031129(6)	7
SAL00739	L3c	2017	Asia	China	Tn801	1	No Integron	0	IncFII(S)_1, IncX1_1, ColpVC_1	3	PHAGE_Shigel_SfIV_NC_022749(2), PHAGE_Entero_ST104_NC_005841(48), PHAGE_Escher_500465_2_NC_049343(4), PHAGE_Escher_pro483_NC_028943(26), PHAGE_Salmon_SJ46_NC_031129(3), PHAGE_Salmon_SJ46_NC_031129(6), PHAGE_Phage_Gifsy_2_NC_010393(30), PHAGE_Salmon_Fels_1_NC_010391(2)	8
SAL03430	L3c	2012	Asia	China	Tn801	1	In1440	1	IncFII(S)_1, IncX1_1, IncN_1, ColpVC_1	4	PHAGE_Entero_ST104_NC_005841(47), PHAGE_Shigel_SfIV_NC_022749(2), PHAGE_Escher_500465_2_NC_049343(4), PHAGE_Escher_pro483_NC_028943(26), PHAGE_Burkho_BcepMu_NC_005882(2), PHAGE_Salmon_SJ46_NC_031129(3), PHAGE_Salmon_SJ46_NC_031129(6), PHAGE_Phage_Gifsy_2_NC_010393(32)	8
SAL03449	L3c	2013	Asia	China	Tn801	1	No Integron	0	IncFII(S)_1, IncX1_1, ColpVC_1	3	PHAGE_Entero_ST104_NC_005841(47), PHAGE_Shigel_SfIV_NC_022749(2), PHAGE_Escher_500465_2_NC_049343(4), PHAGE_Escher_pro483_NC_028943(27), PHAGE_Burkho_BcepMu_NC_005882(2), PHAGE_Salmon_SJ46_NC_031129(3), PHAGE_Salmon_SJ46_NC_031129(6), PHAGE_Phage_Gifsy_2_NC_010393(32)	8
SAL03411	L3c	2018	Asia	China	Tn801, Tn1721	2	No Integron	0	IncFII(S)_1, IncX1_1, ColpVC_1	3	PHAGE_Entero_ST104_NC_005841(47), PHAGE_Shigel_SfIV_NC_022749(2), PHAGE_Escher_500465_2_NC_049343(4), PHAGE_Escher_pro483_NC_028943(27), PHAGE_Salmon_SJ46_NC_031129(3), PHAGE_Salmon_SJ46_NC_031129(6), PHAGE_Phage_Gifsy_2_NC_010393(32)	7
SAL02665	L3c	2018	Asia	China	Tn801	1	No Integron	0	IncFII(S)_1, IncX1_1, ColpVC_1	3	PHAGE_Shigel_SfIV_NC_022749(2), PHAGE_Entero_ST104_NC_005841(51), PHAGE_Escher_pro483_NC_028943(27), PHAGE_Burkho_phiE255_NC_009237(2), PHAGE_Salmon_SJ46_NC_031129(3), PHAGE_Salmon_SJ46_NC_031129(6), PHAGE_Phage_Gifsy_2_NC_010393(32)	7
SAL03414	L3c	2018	Asia	China	Tn801	1	No Integron	0	IncFII(S)_1, IncX1_1, ColpVC_1	3	PHAGE_Shigel_SfIV_NC_022749(2), PHAGE_Entero_ST104_NC_005841(51), PHAGE_Escher_500465_2_NC_049343(4), PHAGE_Escher_pro483_NC_028943(26), PHAGE_Burkho_phiE255_NC_009237(2), PHAGE_Salmon_SJ46_NC_031129(3), PHAGE_Salmon_SJ46_NC_031129(6), PHAGE_Phage_Gifsy_2_NC_010393(32)	8
SAL_PA7719AA	L3c	2009	Asia	China	Tn801	1	No Integron	0	IncFII(S)_1, IncX1_1	2	PHAGE_Escher_500465_2_NC_049343(4), PHAGE_Salmon_SJ46_NC_031129(6), PHAGE_Shigel_SfIV_NC_022749(2), PHAGE_Entero_ST104_NC_005841(49), PHAGE_Salmon_SJ46_NC_031129(3), PHAGE_Phage_Gifsy_2_NC_010393(30), PHAGE_Escher_pro483_NC_028943(27)	7
SAL03301	L3c	2015	Asia	China	Tn801	1	In282	1	IncFII(S)_1, IncX1_1, IncFIB(S)_1, ColpVC_1, IncN_1	5	PHAGE_Entero_ST104_NC_005841(46), PHAGE_Shigel_SfIV_NC_022749(2), PHAGE_Escher_500465_2_NC_049343(4), PHAGE_Shigel_POCJ13_NC_025434(3), PHAGE_Escher_pro483_NC_028943(26), PHAGE_Burkho_BcepMu_NC_005882(2), PHAGE_Salmon_SJ46_NC_031129(3), PHAGE_Salmon_SJ46_NC_031129(6), PHAGE_Salmon_118970_sal3_NC_031940(57), PHAGE_Phage_Gifsy_2_NC_010393(31)	10
SAL03304	L3c	2015	Asia	China	Tn1721, Tn801	2	No Integron	0	IncFII(S)_1, IncX1_1, IncFIB(S)_1	3	PHAGE_Escher_500465_2_NC_049343(4), PHAGE_Salmon_SJ46_NC_031129(6), PHAGE_Burkho_BcepMu_NC_005882(2), PHAGE_Salmon_SJ46_NC_031129(3), PHAGE_Entero_ST104_NC_005841(51), PHAGE_Salmon_118970_sal3_NC_031940(57), PHAGE_Yersin_L_413C_NC_004745(16), PHAGE_Shigel_Stx_NC_029120(3)	8
SAL00744	L3c	2017	Asia	China	Tn801	1	No Integron	0	IncFII(S)_1, IncX1_1, ColpVC_1	3	PHAGE_Entero_ST104_NC_005841(47), PHAGE_Shigel_SfIV_NC_022749(2), PHAGE_Escher_500465_2_NC_049343(4), PHAGE_Escher_pro483_NC_028943(26), PHAGE_Burkho_phiE255_NC_009237(2), PHAGE_Salmon_SJ46_NC_031129(3), PHAGE_Salmon_SJ46_NC_031129(6), PHAGE_Phage_Gifsy_2_NC_010393(32)	8
SAL02677	L3c	2013	Asia	China	Tn1721, Tn801	2	No Integron	0	IncFII(S)_1, IncX1_1, ColpVC_1	3	PHAGE_Shigel_SfIV_NC_022749(2), PHAGE_Entero_ST104_NC_005841(51), PHAGE_Escher_500465_2_NC_049343(4), PHAGE_Escher_pro483_NC_028943(26), PHAGE_Burkho_phiE255_NC_009237(2), PHAGE_Salmon_SJ46_NC_031129(3), PHAGE_Phage_Gifsy_2_NC_010393(32), PHAGE_Salmon_SJ46_NC_031129(6)	8
C49_FKDN220483803-1A_H25LVDSX5_L1	L3c	not collected	Asia	China	Tn801	1	No Integron	0	IncFII(S)_1, IncX1_1, ColpVC_1	3	PHAGE_Escher_500465_2_NC_049343(4), PHAGE_Escher_pro483_NC_028943(26), PHAGE_Entero_ST104_NC_005841(49), PHAGE_Burkho_BcepMu_NC_005882(2), PHAGE_Salmon_SJ46_NC_031129(3), PHAGE_Phage_Gifsy_2_NC_010393(31), PHAGE_Salmon_SJ46_NC_031129(6)	7
SAL00735	L3c	2016	Asia	China	Tn801	1	No Integron	0	IncFII(S)_1, IncX1_1, ColpVC_1	3	PHAGE_Escher_500465_2_NC_049343(4), PHAGE_Entero_ST104_NC_005841(51), PHAGE_Entero_mEp237_NC_019704(3), PHAGE_Phage_Gifsy_2_NC_010393(30), PHAGE_Burkho_BcepMu_NC_005882(2), PHAGE_Salmon_SJ46_NC_031129(3), PHAGE_Salmon_SJ46_NC_031129(6)	7
SRR26662937	L3c	2022	Asia	China	Tn801	1	No Integron	0	IncFII(S)_1, IncX1_1, ColpVC_1	3	PHAGE_Shigel_SfIV_NC_022749(2), PHAGE_Entero_ST104_NC_005841(51), PHAGE_Escher_500465_2_NC_049343(4), PHAGE_Escher_pro483_NC_028943(27), PHAGE_Burkho_BcepMu_NC_005882(2), PHAGE_Salmon_SJ46_NC_031129(3), PHAGE_Salmon_SJ46_NC_031129(6), PHAGE_Phage_Gifsy_2_NC_010393(30)	8
SAL03293	L3c	2015	Asia	China	Tn1721, Tn801	2	No Integron	0	IncFII(S)_1, IncX1_1, IncFIB(S)_1, ColpVC_1	4	PHAGE_Shigel_SfIV_NC_022749(2), PHAGE_Entero_ST104_NC_005841(48), PHAGE_Escher_500465_2_NC_049343(4), PHAGE_Escher_pro483_NC_028943(26), PHAGE_Shigel_POCJ13_NC_025434(3), PHAGE_Salmon_SJ46_NC_031129(3), PHAGE_Salmon_SJ46_NC_031129(6), PHAGE_Salmon_118970_sal3_NC_031940(57), PHAGE_Phage_Gifsy_2_NC_010393(31)	9
SAL03418	L3c	2018	Asia	China	Tn801	1	No Integron	0	IncFII(S)_1, IncX1_1, ColpVC_1	3	PHAGE_Entero_ST104_NC_005841(47), PHAGE_Shigel_SfIV_NC_022749(2), PHAGE_Escher_500465_2_NC_049343(4), PHAGE_Escher_pro483_NC_028943(26), PHAGE_Salmon_SJ46_NC_031129(3), PHAGE_Salmon_SJ46_NC_031129(6), PHAGE_Phage_Gifsy_2_NC_010393(32)	7
SAL03452	L3c	2013	Asia	China	Tn801	1	No Integron	0	IncFII(S)_1, IncX1_1, ColpVC_1	3	PHAGE_Entero_ST104_NC_005841(47), PHAGE_Shigel_SfIV_NC_022749(2), PHAGE_Escher_500465_2_NC_049343(4), PHAGE_Escher_pro483_NC_028943(27), PHAGE_Salmon_SJ46_NC_031129(3), PHAGE_Salmon_SJ46_NC_031129(6), PHAGE_Phage_Gifsy_2_NC_010393(32)	7
SAL03409	L3c	2018	Asia	China	Tn801, Tn1721	2	No Integron	0	IncFII(S)_1, IncX1_1, ColpVC_1	3	PHAGE_Entero_ST104_NC_005841(47), PHAGE_Shigel_SfIV_NC_022749(2), PHAGE_Escher_500465_2_NC_049343(4), PHAGE_Escher_pro483_NC_028943(26), PHAGE_Burkho_phiE255_NC_009237(2), PHAGE_Salmon_SJ46_NC_031129(3), PHAGE_Salmon_SJ46_NC_031129(6), PHAGE_Phage_Gifsy_2_NC_010393(32)	8
SAL02698	L3c	2018	Asia	China	Tn801	1	No Integron	0	IncFII(S)_1, IncX1_1, ColpVC_1	3	PHAGE_Entero_ST104_NC_005841(47), PHAGE_Shigel_SfIV_NC_022749(2), PHAGE_Escher_500465_2_NC_049343(4), PHAGE_Escher_pro483_NC_028943(26), PHAGE_Burkho_phiE255_NC_009237(2), PHAGE_Salmon_SJ46_NC_031129(3), PHAGE_Salmon_SJ46_NC_031129(6), PHAGE_Phage_Gifsy_2_NC_010393(32)	8
SAL00725	L3c	2015	Asia	China	Tn801	1	No Integron	0	IncFII(S)_1, IncX1_1, ColpVC_1	3	PHAGE_Escher_500465_2_NC_049343(4), PHAGE_Entero_ST104_NC_005841(48), PHAGE_Escher_pro483_NC_028943(27), PHAGE_Salmon_SJ46_NC_031129(3), PHAGE_Salmon_SJ46_NC_031129(6), PHAGE_Phage_Gifsy_2_NC_010393(31)	6
SAL02656	L3c	2018	Asia	China	Tn801, Tn1721	2	No Integron	0	IncFII(S)_1, IncX1_1, ColpVC_1	3	PHAGE_Shigel_SfIV_NC_022749(2), PHAGE_Entero_ST104_NC_005841(51), PHAGE_Escher_500465_2_NC_049343(4), PHAGE_Salmon_SJ46_NC_031129(3), PHAGE_Salmon_SJ46_NC_031129(6), PHAGE_Phage_Gifsy_2_NC_010393(32)	6
C13_FKDN220485113-1A_H25L7DSX5_L2	L3c	2020	Asia	China	Tn801	1	No Integron	0	IncFII(S)_1, IncX1_1, ColpVC_1	3	PHAGE_Shigel_SfIV_NC_022749(2), PHAGE_Entero_ST104_NC_005841(51), PHAGE_Escher_500465_2_NC_049343(4), PHAGE_Yersin_L_413C_NC_004745(18), PHAGE_Burkho_BcepMu_NC_005882(2), PHAGE_Salmon_SJ46_NC_031129(3), PHAGE_Phage_Gifsy_2_NC_010393(30)	7
SAL03300	L3c	2015	Asia	China	Tn801	1	No Integron	0	IncFII(S)_1, IncX1_1, ColpVC_1	3	PHAGE_Shigel_SfIV_NC_022749(2), PHAGE_Entero_ST104_NC_005841(51), PHAGE_Escher_500465_2_NC_049343(4), PHAGE_Escher_pro483_NC_028943(27), PHAGE_Burkho_phiE255_NC_009237(2), PHAGE_Salmon_SJ46_NC_031129(3), PHAGE_Salmon_SJ46_NC_031129(6), PHAGE_Phage_Gifsy_2_NC_010393(32)	8
SAL00738	L3c	2017	Asia	China	Tn801	1	No Integron	0	IncFII(S)_1, IncX1_1, ColpVC_1	3	PHAGE_Phage_Gifsy_2_NC_010393(31), PHAGE_Escher_500465_2_NC_049343(4), PHAGE_Entero_ST104_NC_005841(48), PHAGE_Escher_pro483_NC_028943(27), PHAGE_Salmon_SJ46_NC_031129(3), PHAGE_Salmon_SJ46_NC_031129(6)	6
SAL_UA3243AA	L3c	2014	Asia	China	Tn801, Tn1721	2	No Integron	0	IncFII(S)_1, IncX1_1, ColpVC_1	3	PHAGE_Escher_pro483_NC_028943(27), PHAGE_Salmon_SJ46_NC_031129(6), PHAGE_Phage_Gifsy_2_NC_010393(31), PHAGE_Escher_500465_2_NC_049343(4), PHAGE_Entero_ST104_NC_005841(47), PHAGE_Shigel_SfIV_NC_022749(2), PHAGE_Salmon_SJ46_NC_031129(3)	7
SAL00743	L3c	2017	Asia	China	Tn801	1	No Integron	0	IncFII(S)_1, IncX1_1, ColpVC_1	3	PHAGE_Shigel_SfIV_NC_022749(2), PHAGE_Escher_500465_2_NC_049343(4), PHAGE_Escher_pro483_NC_028943(27), PHAGE_Burkho_phiE255_NC_009237(2), PHAGE_Salmon_SJ46_NC_031129(3), PHAGE_Entero_ST104_NC_005841(49), PHAGE_Salmon_SJ46_NC_031129(6), PHAGE_Phage_Gifsy_2_NC_010393(28)	8
SAL03315	L3c	2014	Asia	China	Tn1721, Tn801	2	No Integron	0	IncFII(S)_1, IncX1_1, IncFIB(S)_1, ColpVC_1	4	PHAGE_Shigel_SfIV_NC_022749(2), PHAGE_Entero_ST104_NC_005841(48), PHAGE_Escher_500465_2_NC_049343(4), PHAGE_Escher_pro483_NC_028943(26), PHAGE_Shigel_POCJ13_NC_025434(3), PHAGE_Burkho_phiE255_NC_009237(2), PHAGE_Salmon_SJ46_NC_031129(3), PHAGE_Salmon_SJ46_NC_031129(6), PHAGE_Salmon_118970_sal3_NC_031940(57), PHAGE_Phage_Gifsy_2_NC_010393(31)	10
SAL03327	L3c	2015	Asia	China	Tn1721, Tn801	2	No Integron	0	IncFII(S)_1, IncX1_1, ColpVC_1	3	PHAGE_Shigel_SfIV_NC_022749(2), PHAGE_Entero_ST104_NC_005841(51), PHAGE_Escher_500465_2_NC_049343(4), PHAGE_Escher_pro483_NC_028943(26), PHAGE_Burkho_phiE255_NC_009237(2), PHAGE_Salmon_SJ46_NC_031129(3), PHAGE_Salmon_SJ46_NC_031129(6), PHAGE_Phage_Gifsy_2_NC_010393(32)	8
SAL02658	L3c	2018	Asia	China	Tn801, Tn1721	2	No Integron	0	IncFII(S)_1, IncX1_1, ColpVC_1	3	PHAGE_Entero_ST104_NC_005841(47), PHAGE_Shigel_SfIV_NC_022749(2), PHAGE_Escher_500465_2_NC_049343(4), PHAGE_Salmon_SJ46_NC_031129(3), PHAGE_Phage_Gifsy_2_NC_010393(32), PHAGE_Salmon_SJ46_NC_031129(6)	6
R51	L3c	2017	Asia	China	No Transposon	0	No Integron	0	No Plasmid	0	PHAGE_Escher_pro483_NC_028943(26), PHAGE_Entero_ST104_NC_005841(44), PHAGE_Entero_mEp237_NC_019704(4), PHAGE_Phage_Gifsy_2_NC_010393(31), PHAGE_Escher_500465_2_NC_049343(5), PHAGE_Escher_500465_1_NC_049342(12)	6
SAL02653	L3c	2018	Asia	China	Tn801	1	No Integron	0	IncFII(S)_1, IncX1_1, ColpVC_1	3	PHAGE_Entero_ST104_NC_005841(47), PHAGE_Shigel_SfIV_NC_022749(2), PHAGE_Escher_pro483_NC_028943(26), PHAGE_Burkho_BcepMu_NC_005882(2), PHAGE_Salmon_SJ46_NC_031129(3), PHAGE_Phage_Gifsy_2_NC_010393(32)	6
SAL04034	L3c	2017	Asia	China	Tn801	1	No Integron	0	IncFII(S)_1, IncX1_1, ColpVC_1	3	PHAGE_Shigel_SfIV_NC_022749(2), PHAGE_Entero_ST104_NC_005841(51), PHAGE_Escher_500465_2_NC_049343(4), PHAGE_Escher_pro483_NC_028943(26), PHAGE_Salmon_SJ46_NC_031129(3), PHAGE_Salmon_SJ46_NC_031129(6), PHAGE_Phage_Gifsy_2_NC_010393(32)	7
SAL04096	L3c	2017	Asia	China	Tn801	1	No Integron	0	IncFII(S)_1, IncX1_1, ColpVC_1	3	PHAGE_Entero_ST104_NC_005841(47), PHAGE_Shigel_SfIV_NC_022749(2), PHAGE_Escher_500465_2_NC_049343(4), PHAGE_Escher_pro483_NC_028943(27), PHAGE_Salmon_SJ46_NC_031129(3), PHAGE_Salmon_SJ46_NC_031129(6), PHAGE_Phage_Gifsy_2_NC_010393(32)	7
SAL03401	L3c	2014	Asia	China	Tn801	1	No Integron	0	IncFII(S)_1, IncX1_1, ColpVC_1	3	PHAGE_Entero_ST104_NC_005841(47), PHAGE_Shigel_SfIV_NC_022749(2), PHAGE_Escher_500465_2_NC_049343(4), PHAGE_Escher_pro483_NC_028943(26), PHAGE_Salmon_SJ46_NC_031129(3), PHAGE_Salmon_SJ46_NC_031129(6), PHAGE_Phage_Gifsy_2_NC_010393(32)	7
SAL02659	L3c	2018	Asia	China	Tn801, Tn1721	2	No Integron	0	IncFII(S)_1, IncX1_1, ColpVC_1	3	PHAGE_Shigel_SfIV_NC_022749(2), PHAGE_Entero_ST104_NC_005841(51), PHAGE_Escher_500465_2_NC_049343(4), PHAGE_Salmon_SJ46_NC_031129(3), PHAGE_Salmon_SJ46_NC_031129(6), PHAGE_Phage_Gifsy_2_NC_010393(32)	6
SAL03288	L3c	2015	Asia	China	Tn801, Tn1721	2	No Integron	0	IncFII(S)_1, IncX1_1, ColpVC_1	3	PHAGE_Shigel_SfIV_NC_022749(2), PHAGE_Entero_ST104_NC_005841(51), PHAGE_Escher_500465_2_NC_049343(4), PHAGE_Escher_pro483_NC_028943(26), PHAGE_Burkho_BcepMu_NC_005882(2), PHAGE_Salmon_SJ46_NC_031129(3), PHAGE_Salmon_SJ46_NC_031129(6), PHAGE_Phage_Gifsy_2_NC_010393(32)	8
SAL03420	L3c	2018	Asia	China	Tn801	1	No Integron	0	IncFII(S)_1, IncX1_1, ColpVC_1	3	PHAGE_Shigel_SfIV_NC_022749(2), PHAGE_Entero_ST104_NC_005841(51), PHAGE_Escher_500465_2_NC_049343(4), PHAGE_Burkho_BcepMu_NC_005882(2), PHAGE_Salmon_SJ46_NC_031129(3), PHAGE_Salmon_SJ46_NC_031129(6), PHAGE_Phage_Gifsy_2_NC_010393(32)	7
SAL_PA7729AA	L3c	2009	Asia	China	Tn801	1	No Integron	0	IncFII(S)_1, IncX1_1, ColpVC_1	3	PHAGE_Phage_Gifsy_2_NC_010393(31), PHAGE_Escher_500465_2_NC_049343(4), PHAGE_Salmon_SJ46_NC_031129(6), PHAGE_Entero_ST104_NC_005841(49), PHAGE_Shigel_SfIV_NC_022749(2), PHAGE_Escher_pro483_NC_028943(26), PHAGE_Salmon_SJ46_NC_031129(3)	7
SAL02660	L3c	2018	Asia	China	Tn1721, Tn801	2	No Integron	0	IncFII(S)_1, IncX1_1, ColpVC_1	3	PHAGE_Entero_ST104_NC_005841(47), PHAGE_Shigel_SfIV_NC_022749(2), PHAGE_Escher_500465_2_NC_049343(4), PHAGE_Burkho_BcepMu_NC_005882(2), PHAGE_Salmon_SJ46_NC_031129(3), PHAGE_Salmon_SJ46_NC_031129(6), PHAGE_Phage_Gifsy_2_NC_010393(32)	7
SAL04019	L3c	2017	Asia	China	Tn801	1	No Integron	0	IncFII(S)_1, IncX1_1, ColpVC_1	3	PHAGE_Entero_ST104_NC_005841(47), PHAGE_Shigel_SfIV_NC_022749(2), PHAGE_Escher_500465_2_NC_049343(4), PHAGE_Escher_pro483_NC_028943(27), PHAGE_Burkho_BcepMu_NC_005882(2), PHAGE_Salmon_SJ46_NC_031129(3), PHAGE_Salmon_SJ46_NC_031129(6), PHAGE_Phage_Gifsy_2_NC_010393(32)	8
TH255	L3c	2022	Asia	China	Tn801	1	No Integron	0	IncFII(S)_1, IncX1_1, ColpVC_1	3	PHAGE_Shigel_SfIV_NC_022749(2), PHAGE_Entero_ST104_NC_005841(51), PHAGE_Escher_500465_2_NC_049343(4), PHAGE_Escher_pro483_NC_028943(26), PHAGE_Burkho_BcepMu_NC_005882(2), PHAGE_Salmon_SJ46_NC_031129(3), PHAGE_Salmon_SJ46_NC_031129(6), PHAGE_Phage_Gifsy_2_NC_010393(30)	8
SAL00737	L3c	2017	Asia	China	Tn801, Tn1721	2	No Integron	0	IncFII(S)_1, IncX1_1, ColpVC_1	3	PHAGE_Entero_ST104_NC_005841(47), PHAGE_Shigel_SfIV_NC_022749(2), PHAGE_Escher_500465_2_NC_049343(4), PHAGE_Salmon_SJ46_NC_031129(3), PHAGE_Salmon_SJ46_NC_031129(6), PHAGE_Phage_Gifsy_2_NC_010393(31)	6
SAL_PA7723AA	L3c	2009	Asia	China	Tn801	1	No Integron	0	IncFII(S)_1, IncX1_1, ColpVC_1	3	PHAGE_Escher_pro483_NC_028943(26), PHAGE_Shigel_SfIV_NC_022749(2), PHAGE_Entero_ST104_NC_005841(51), PHAGE_Escher_500465_2_NC_049343(4), PHAGE_Salmon_SJ46_NC_031129(6), PHAGE_Phage_Gifsy_2_NC_010393(30), PHAGE_Salmon_SJ46_NC_031129(3)	7
SAL04032	L3c	2017	Asia	China	Tn801, Tn1721	2	No Integron	0	IncFII(S)_1, IncX1_1, ColpVC_1	3	PHAGE_Entero_ST104_NC_005841(47), PHAGE_Shigel_SfIV_NC_022749(2), PHAGE_Escher_500465_2_NC_049343(4), PHAGE_Escher_pro483_NC_028943(27), PHAGE_Burkho_BcepMu_NC_005882(2), PHAGE_Salmon_SJ46_NC_031129(3), PHAGE_Salmon_SJ46_NC_031129(6), PHAGE_Phage_Gifsy_2_NC_010393(32)	8
SAL03450	L3c	2013	Asia	China	Tn801	1	No Integron	0	IncFII(S)_1, IncX1_1, ColpVC_1	3	PHAGE_Shigel_SfIV_NC_022749(2), PHAGE_Entero_ST104_NC_005841(51), PHAGE_Escher_500465_2_NC_049343(4), PHAGE_Escher_pro483_NC_028943(26), PHAGE_Burkho_phiE255_NC_009237(2), PHAGE_Salmon_SJ46_NC_031129(3), PHAGE_Salmon_SJ46_NC_031129(6), PHAGE_Phage_Gifsy_2_NC_010393(32)	8
SAL03425	L3c	2011	Asia	China	Tn1721, Tn801	2	No Integron	0	IncFII(S)_1, IncX1_1, ColpVC_1	3	PHAGE_Shigel_SfIV_NC_022749(2), PHAGE_Entero_ST104_NC_005841(51), PHAGE_Escher_500465_2_NC_049343(4), PHAGE_Escher_pro483_NC_028943(27), PHAGE_Burkho_BcepMu_NC_005882(2), PHAGE_Salmon_SJ46_NC_031129(3), PHAGE_Salmon_SJ46_NC_031129(6), PHAGE_Phage_Gifsy_2_NC_010393(32)	8
TH259	L3c	2022	Asia	China	Tn801	1	No Integron	0	IncFII(S)_1, IncX1_1, ColpVC_1	3	PHAGE_Entero_ST104_NC_005841(47), PHAGE_Shigel_SfIV_NC_022749(2), PHAGE_Escher_500465_2_NC_049343(4), PHAGE_Escher_pro483_NC_028943(26), PHAGE_Salmon_SJ46_NC_031129(3), PHAGE_Salmon_SJ46_NC_031129(6), PHAGE_Phage_Gifsy_2_NC_010393(31)	7
TH257	L3c	2022	Asia	China	Tn801	1	No Integron	0	IncFII(S)_1, IncX1_1, ColpVC_1	3	PHAGE_Shigel_SfIV_NC_022749(2), PHAGE_Entero_ST104_NC_005841(51), PHAGE_Escher_500465_2_NC_049343(4), PHAGE_Escher_pro483_NC_028943(26), PHAGE_Salmon_SJ46_NC_031129(3), PHAGE_Salmon_SJ46_NC_031129(6), PHAGE_Phage_Gifsy_2_NC_010393(30)	7
SAL03427	L3c	2011	Asia	China	Tn801	1	No Integron	0	IncFII(S)_1, IncX1_1, ColpVC_1	3	PHAGE_Entero_ST104_NC_005841(47), PHAGE_Shigel_SfIV_NC_022749(2), PHAGE_Escher_500465_2_NC_049343(4), PHAGE_Escher_pro483_NC_028943(27), PHAGE_Burkho_BcepMu_NC_005882(2), PHAGE_Salmon_SJ46_NC_031129(3), PHAGE_Salmon_SJ46_NC_031129(6), PHAGE_Phage_Gifsy_2_NC_010393(32)	8
SAL03451	L3c	2013	Asia	China	Tn801	1	No Integron	0	IncFII(S)_1, IncX1_1, ColpVC_1	3	PHAGE_Shigel_SfIV_NC_022749(2), PHAGE_Entero_ST104_NC_005841(51), PHAGE_Escher_500465_2_NC_049343(4), PHAGE_Escher_pro483_NC_028943(26), PHAGE_Burkho_phiE255_NC_009237(2), PHAGE_Salmon_SJ46_NC_031129(3), PHAGE_Salmon_SJ46_NC_031129(6), PHAGE_Phage_Gifsy_2_NC_010393(32)	8
SAL02678	L3c	2013	Asia	China	Tn801	1	No Integron	0	IncFII(S)_1, IncX1_1, ColpVC_1	3	PHAGE_Shigel_SfIV_NC_022749(2), PHAGE_Entero_ST104_NC_005841(51), PHAGE_Escher_500465_2_NC_049343(4), PHAGE_Escher_pro483_NC_028943(26), PHAGE_Burkho_BcepMu_NC_005882(2), PHAGE_Salmon_SJ46_NC_031129(3), PHAGE_Salmon_SJ46_NC_031129(6), PHAGE_Phage_Gifsy_2_NC_010393(32)	8
SAL02701	L3c	2018	Asia	China	Tn801	1	No Integron	0	IncFII(S)_1, IncX1_1, ColpVC_1	3	PHAGE_Entero_ST104_NC_005841(47), PHAGE_Shigel_SfIV_NC_022749(2), PHAGE_Escher_500465_2_NC_049343(4), PHAGE_Escher_pro483_NC_028943(26), PHAGE_Burkho_phiE255_NC_009237(2), PHAGE_Salmon_SJ46_NC_031129(3), PHAGE_Salmon_SJ46_NC_031129(6), PHAGE_Phage_Gifsy_2_NC_010393(32)	8
SAL03406	L3c	2018	Asia	China	Tn801, Tn1721	2	No Integron	0	IncFII(S)_1, IncX1_1, ColpVC_1	3	PHAGE_Shigel_SfIV_NC_022749(2), PHAGE_Entero_ST104_NC_005841(51), PHAGE_Escher_500465_2_NC_049343(4), PHAGE_Escher_pro483_NC_028943(27), PHAGE_Salmon_SJ46_NC_031129(3), PHAGE_Salmon_SJ46_NC_031129(6), PHAGE_Phage_Gifsy_2_NC_010393(32)	7
SAL00724	L3b	2015	Asia	China	No Transposon	0	No Integron	0	IncFII(S)_1	1	PHAGE_Escher_500465_2_NC_049343(4), PHAGE_Entero_ST104_NC_005841(46), PHAGE_Shigel_SfIV_NC_022749(2), PHAGE_Clostr_c_st_NC_007581(2), PHAGE_Salmon_SJ46_NC_031129(3), PHAGE_Phage_Gifsy_2_NC_010393(32)	6
SRR24215044	L3b	2021	Europe	Netherland	No Transposon	0	No Integron	0	IncFII(S)_1, ColpVC_1	2	PHAGE_Shigel_SfIV_NC_022749(2), PHAGE_Entero_ST104_NC_005841(51), PHAGE_Escher_500465_2_NC_049343(4), PHAGE_Salmon_SJ46_NC_031129(3), PHAGE_Phage_Gifsy_2_NC_010393(31)	5
SAL00700	L3b	2013	Asia	China	No Transposon	0	No Integron	0	IncFII(S)_1, IncQ1_1, ColpVC_1	3	PHAGE_Shigel_SfIV_NC_022749(2), PHAGE_Entero_ST104_NC_005841(51), PHAGE_Escher_500465_2_NC_049343(4), PHAGE_Burkho_phiE255_NC_009237(2), PHAGE_Salmon_SJ46_NC_031129(3), PHAGE_Phage_Gifsy_2_NC_010393(32)	6
SAL_PA7718AA	L3b	2014	Asia	China	No Transposon	0	No Integron	0	IncFII(S)_1, ColpVC_1	2	PHAGE_Shigel_SfIV_NC_022749(2), PHAGE_Entero_ST104_NC_005841(48), PHAGE_Escher_500465_2_NC_049343(4), PHAGE_Burkho_phiE255_NC_009237(2), PHAGE_Salmon_SJ46_NC_031129(3), PHAGE_Phage_Gifsy_2_NC_010393(31)	6
SAL_PA7725AA	L3b	1993	Asia	China	Tn2012, Tn4, Tn801	3	No Integron	0	IncFII(S)_1, IncQ1_1, ColpVC_1	3	PHAGE_Salmon_SJ46_NC_031129(6), PHAGE_Entero_ST104_NC_005841(12), PHAGE_Escher_500465_2_NC_049343(4), PHAGE_Burkho_phiE255_NC_009237(2), PHAGE_Salmon_SJ46_NC_031129(3), PHAGE_Phage_Gifsy_2_NC_010393(30), PHAGE_Shigel_SfIV_NC_022749(2), PHAGE_Entero_ST104_NC_005841(37)	8
SAL04024	L3b	2017	Asia	China	No Transposon	0	No Integron	0	IncFII(S)_1, ColpVC_1	2	PHAGE_Shigel_SfIV_NC_022749(2), PHAGE_Escher_500465_2_NC_049343(4), PHAGE_Clostr_c_st_NC_007581(2), PHAGE_Salmon_SJ46_NC_031129(3), PHAGE_Phage_Gifsy_2_NC_010393(31)	5
SAL_FB2387AA	L3b	2017	not collected	not collected	No Transposon	0	No Integron	0	IncFII(S)_1, ColpVC_1	2	PHAGE_Burkho_phiE255_NC_009237(2), PHAGE_Salmon_SJ46_NC_031129(3), PHAGE_Phage_Gifsy_2_NC_010393(31), PHAGE_Shigel_SfIV_NC_022749(2), PHAGE_Entero_ST104_NC_005841(51), PHAGE_Escher_500465_2_NC_049343(4)	6
SAL03334	L3b	2015	Asia	China	No Transposon	0	In1440	1	IncFII(S)_1, IncN_1, IncFIB(S)_1, ColpVC_1	4	PHAGE_Shigel_SfIV_NC_022749(2), PHAGE_Entero_ST104_NC_005841(48), PHAGE_Escher_500465_2_NC_049343(4), PHAGE_Shigel_Stx_NC_029120(3), PHAGE_Clostr_c_st_NC_007581(2), PHAGE_Salmon_SJ46_NC_031129(3), PHAGE_Salmon_118970_sal3_NC_031940(57), PHAGE_Phage_Gifsy_2_NC_010393(31), PHAGE_Phage_Gifsy_2_NC_010393(5)	9
SAL_PA7702AA	L3b	2008	Asia	China	No Transposon	0	No Integron	0	IncFII(S)_1, ColpVC_1	2	PHAGE_Shigel_SfIV_NC_022749(2), PHAGE_Entero_ST104_NC_005841(51), PHAGE_Phage_Gifsy_2_NC_010393(30), PHAGE_Salmon_SJ46_NC_031129(3), PHAGE_Escher_500465_2_NC_049343(4)	5
SRR24215038	L3b	2021	Europe	Netherland	No Transposon	0	No Integron	0	IncFII(S)_1, ColpVC_1	2	PHAGE_Escher_500465_2_NC_049343(4), PHAGE_Shigel_SfIV_NC_022749(2), PHAGE_Entero_ST104_NC_005841(49), PHAGE_Salmon_SJ46_NC_031129(3), PHAGE_Phage_Gifsy_2_NC_010393(31)	5
SAL_PA7755AA	L3b	2012	Asia	China	No Transposon	0	No Integron	0	IncFII(S)_1	1	PHAGE_Burkho_phiE255_NC_009237(2), PHAGE_Salmon_SJ46_NC_031129(3), PHAGE_Phage_Gifsy_2_NC_010393(30), PHAGE_Shigel_SfIV_NC_022749(2), PHAGE_Entero_ST104_NC_005841(51), PHAGE_Escher_500465_2_NC_049343(4)	6
SAL_PA6310AA	L3b	1962	Asia	China	Tn6205	1	No Integron	0	IncFII(S)_1, IncQ1_1, ColpVC_1	3	PHAGE_Entero_ST104_NC_005841(49), PHAGE_Escher_500465_2_NC_049343(4), PHAGE_Shigel_SfIV_NC_022749(2), PHAGE_Phage_Gifsy_2_NC_010393(29), PHAGE_Salmon_SJ46_NC_031129(3)	5
SAL_PA7689AA	L3b	2013	Asia	China	No Transposon	0	No Integron	0	IncFII(S)_1, ColpVC_1	2	PHAGE_Phage_Gifsy_2_NC_010393(30), PHAGE_Shigel_SfIV_NC_022749(2), PHAGE_Entero_ST104_NC_005841(51), PHAGE_Escher_500465_2_NC_049343(4), PHAGE_Salmon_SJ46_NC_031129(3)	5
ERS2630752	L3b	2008	Asia	China	No Transposon	0	No Integron	0	IncFII(S)_1, ColpVC_1	2	PHAGE_Shigel_SfIV_NC_022749(2), PHAGE_Entero_ST104_NC_005841(47), PHAGE_Escher_500465_2_NC_049343(4), PHAGE_Phage_Gifsy_2_NC_010393(29), PHAGE_Entero_mEp237_NC_019704(3), PHAGE_Salmon_SJ46_NC_031129(3), PHAGE_Salmon_Fels_1_NC_010391(5)	7
ERS1867654	L3b	2012	Europe	Sweden	No Transposon	0	No Integron	0	IncFII(S)_1, ColpVC_1	2	PHAGE_Entero_ST104_NC_005841(47), PHAGE_Shigel_SfIV_NC_022749(2), PHAGE_Burkho_BcepMu_NC_005882(2), PHAGE_Salmon_SJ46_NC_031129(3), PHAGE_Escher_500465_2_NC_049343(4), PHAGE_Phage_Gifsy_2_NC_010393(32)	6
SAL00712	L3b	2014	Asia	China	No Transposon	0	In498	1	IncFII(S)_1, IncN_1, ColpVC_1	3	PHAGE_Shigel_SfIV_NC_022749(2), PHAGE_Entero_ST104_NC_005841(51), PHAGE_Phage_Gifsy_2_NC_010393(31), PHAGE_Escher_500465_2_NC_049343(4), PHAGE_Burkho_BcepMu_NC_005882(2), PHAGE_Salmon_SJ46_NC_031129(3)	6
SAL_PA7727AA	L3b	1998	Asia	China	No Transposon	0	No Integron	0	IncFII(S)_1, ColpVC_1	2	PHAGE_Salmon_SJ46_NC_031129(3), PHAGE_Phage_Gifsy_2_NC_010393(31), PHAGE_Shigel_SfIV_NC_022749(2), PHAGE_Escher_500465_2_NC_049343(4), PHAGE_Entero_ST104_NC_005841(49)	5
SAL03287	L3b	2015	Asia	China	No Transposon	0	No Integron	0	IncFII(S)_1, ColpVC_1	2	PHAGE_Phage_Gifsy_2_NC_010393(31), PHAGE_Entero_mEp237_NC_019704(3), PHAGE_Entero_ST104_NC_005841(47), PHAGE_Shigel_SfIV_NC_022749(2), PHAGE_Escher_500465_2_NC_049343(4), PHAGE_Burkho_phiE255_NC_009237(2), PHAGE_Salmon_SJ46_NC_031129(3)	7
SAL03305	L3b	2015	Asia	China	No Transposon	0	No Integron	0	IncFII(S)_1, ColpVC_1	2	PHAGE_Entero_ST104_NC_005841(47), PHAGE_Shigel_SfIV_NC_022749(2), PHAGE_Escher_500465_2_NC_049343(4), PHAGE_Salmon_SJ46_NC_031129(3), PHAGE_Phage_Gifsy_2_NC_010393(32)	5
E393-2	L3b	2023	Asia	China	No Transposon	0	No Integron	0	IncFII(S)_1, ColpVC_1	2	PHAGE_Entero_ST104_NC_005841(47), PHAGE_Shigel_SfIV_NC_022749(2), PHAGE_Escher_500465_2_NC_049343(4), PHAGE_Clostr_c_st_NC_007581(2), PHAGE_Salmon_SJ46_NC_031129(3), PHAGE_Phage_Gifsy_2_NC_010393(31)	6
SAL03321	L3b	2014	Asia	China	No Transposon	0	In473	1	IncFII(S)_1, IncN_1, ColpVC_1	3	PHAGE_Entero_ST104_NC_005841(47), PHAGE_Shigel_SfIV_NC_022749(2), PHAGE_Entero_mEp237_NC_019704(3), PHAGE_Phage_Gifsy_2_NC_010393(29), PHAGE_Escher_500465_2_NC_049343(4), PHAGE_Salmon_SJ46_NC_031129(3), PHAGE_Salmon_Fels_1_NC_010391(5)	7
SAL_PA7971AA	L3b	1998	Asia	China	No Transposon	0	In498	1	IncFII(S)_1, IncN_1, ColpVC_1	3	PHAGE_Shigel_SfIV_NC_022749(2), PHAGE_Entero_ST104_NC_005841(51), PHAGE_Salmon_SJ46_NC_031129(3), PHAGE_Phage_Gifsy_2_NC_010393(28), PHAGE_Escher_500465_2_NC_049343(4)	5
SAL03318	L3b	2014	Asia	China	No Transposon	0	No Integron	0	IncFII(S)_1, ColpVC_1	2	PHAGE_Shigel_SfIV_NC_022749(2), PHAGE_Entero_ST104_NC_005841(51), PHAGE_Escher_500465_2_NC_049343(4), PHAGE_Burkho_BcepMu_NC_005882(2), PHAGE_Salmon_SJ46_NC_031129(3), PHAGE_Phage_Gifsy_2_NC_010393(32)	6
SAL03324	L3b	2014	Asia	China	No Transposon	0	No Integron	0	IncFII(S)_1, ColpVC_1	2	PHAGE_Shigel_SfIV_NC_022749(2), PHAGE_Phage_Gifsy_2_NC_010393(29), PHAGE_Entero_mEp237_NC_019704(3), PHAGE_Escher_500465_2_NC_049343(4), PHAGE_Burkho_BcepMu_NC_005882(2), PHAGE_Salmon_SJ46_NC_031129(3), PHAGE_Phage_Gifsy_2_NC_010393(5)	7
SRR24215036	L3b	2021	Europe	Netherland	No Transposon	0	No Integron	0	IncFII(S)_1, ColpVC_1	2	PHAGE_Phage_Gifsy_2_NC_010393(32), PHAGE_Shigel_SfIV_NC_022749(2), PHAGE_Entero_ST104_NC_005841(51), PHAGE_Escher_500465_2_NC_049343(4), PHAGE_Escher_500465_1_NC_049342(12), PHAGE_Salmon_SJ46_NC_031129(3)	6
SAL_PA7757AA	L3b	2008	Asia	China	No Transposon	0	No Integron	0	IncFII(S)_1, ColpVC_1	2	PHAGE_Escher_500465_2_NC_049343(4), PHAGE_Phage_Gifsy_2_NC_010393(30), PHAGE_Shigel_SfIV_NC_022749(2), PHAGE_Entero_ST104_NC_005841(51), PHAGE_Clostr_c_st_NC_007581(2), PHAGE_Salmon_SJ46_NC_031129(3)	6
SAL03331	L3b	2014	Asia	China	No Transposon	0	In1440	1	IncFII(S)_1, IncN_1, ColpVC_1	3	PHAGE_Entero_ST104_NC_005841(47), PHAGE_Shigel_SfIV_NC_022749(2), PHAGE_Entero_mEp237_NC_019704(3), PHAGE_Phage_Gifsy_2_NC_010393(29), PHAGE_Escher_500465_2_NC_049343(4), PHAGE_Burkho_phiE255_NC_009237(2), PHAGE_Salmon_SJ46_NC_031129(3), PHAGE_Salmon_Fels_1_NC_010391(5)	8
SAL04027	L3b	2017	Asia	China	Tn6205	1	No Integron	0	IncFII(S)_1, IncQ1_1, ColpVC_1	3	PHAGE_Entero_ST104_NC_005841(47), PHAGE_Shigel_SfIV_NC_022749(2), PHAGE_Escher_500465_2_NC_049343(4), PHAGE_Salmon_SJ46_NC_031129(3), PHAGE_Phage_Gifsy_2_NC_010393(32)	5
SAL03323	L3b	2014	Asia	China	No Transposon	0	In1440	1	IncFII(S)_1, IncN_1, ColpVC_1	3	PHAGE_Entero_ST104_NC_005841(47), PHAGE_Shigel_SfIV_NC_022749(2), PHAGE_Entero_mEp237_NC_019704(3), PHAGE_Phage_Gifsy_2_NC_010393(29), PHAGE_Escher_500465_2_NC_049343(4), PHAGE_Clostr_c_st_NC_007581(2), PHAGE_Salmon_SJ46_NC_031129(3), PHAGE_Phage_Gifsy_2_NC_010393(5)	8
SAL00741	L3b	2017	Asia	China	Tn6205	1	No Integron	0	IncFII(S)_1, IncI1_1_Alpha, IncQ1_1, ColpVC_1	4	PHAGE_Shigel_SfIV_NC_022749(2), PHAGE_Escher_500465_2_NC_049343(4), PHAGE_Entero_ST104_NC_005841(49), PHAGE_Salmon_SJ46_NC_031129(3), PHAGE_Phage_Gifsy_2_NC_010393(32)	5
GCA_015024695.1	L3b	2013	Europe	Germany	No Transposon	0	No Integron	0	IncFII(S)_1, ColpVC_1	2	PHAGE_Salmon_Fels_1_NC_010391(4), PHAGE_Clostr_c_st_NC_007581(2), PHAGE_Salmon_SJ46_NC_031129(3), PHAGE_Phage_Gifsy_2_NC_010393(32), PHAGE_Entero_ST104_NC_005841(47), PHAGE_Shigel_SfIV_NC_022749(2), PHAGE_Escher_500465_2_NC_049343(4)	7
ERS1867657	L3b	2012	Europe	Sweden	No Transposon	0	No Integron	0	IncFII(S)_1, ColpVC_1	2	PHAGE_Shigel_SfIV_NC_022749(2), PHAGE_Entero_ST104_NC_005841(51), PHAGE_Phage_Gifsy_2_NC_010393(28), PHAGE_Entero_mEp237_NC_019704(3), PHAGE_Escher_500465_2_NC_049343(4), PHAGE_Salmon_SJ46_NC_031129(3), PHAGE_Phage_Gifsy_2_NC_010393(5)	7
SAL04037	L3b	2017	Asia	China	No Transposon	0	In1440	1	IncFII(S)_1, IncN_1, ColpVC_1	3	PHAGE_Shigel_SfIV_NC_022749(2), PHAGE_Entero_ST104_NC_005841(51), PHAGE_Escher_500465_2_NC_049343(4), PHAGE_Burkho_phiE255_NC_009237(2), PHAGE_Salmon_SJ46_NC_031129(3), PHAGE_Phage_Gifsy_2_NC_010393(31)	6
SAL02679	L3b	2013	Asia	China	No Transposon	0	No Integron	0	IncFII(S)_1, ColpVC_1	2	PHAGE_Entero_ST104_NC_005841(47), PHAGE_Shigel_SfIV_NC_022749(2), PHAGE_Escher_500465_2_NC_049343(4), PHAGE_Clostr_c_st_NC_007581(2), PHAGE_Salmon_SJ46_NC_031129(3), PHAGE_Phage_Gifsy_2_NC_010393(31)	6
SAL03386	L3b	2008	Asia	China	Tn801	1	In1440	1	IncFII(S)_1, IncX1_1, IncN_1, ColpVC_1	4	PHAGE_Shigel_SfIV_NC_022749(2), PHAGE_Entero_ST104_NC_005841(51), PHAGE_Escher_500465_2_NC_049343(4), PHAGE_Escher_pro483_NC_028943(27), PHAGE_Burkho_phiE255_NC_009237(2), PHAGE_Salmon_SJ46_NC_031129(3), PHAGE_Phage_Gifsy_2_NC_010393(32), PHAGE_Salmon_SJ46_NC_031129(6)	8
ERS2630720	L3b	1965	Asia	China	No Transposon	0	No Integron	0	IncFII(S)_1, ColpVC_1	2	PHAGE_Phage_Gifsy_2_NC_010393(32), PHAGE_Shigel_SfIV_NC_022749(2), PHAGE_Escher_500465_2_NC_049343(4), PHAGE_Entero_ST104_NC_005841(49), PHAGE_Salmon_SJ46_NC_031129(3)	5
SRR24215042	L3b	2021	Europe	Netherland	No Transposon	0	No Integron	0	IncFII(S)_1, ColpVC_1	2	PHAGE_Escher_500465_2_NC_049343(4), PHAGE_Burkho_BcepMu_NC_005882(2), PHAGE_Salmon_SJ46_NC_031129(3), PHAGE_Entero_ST104_NC_005841(49), PHAGE_Phage_Gifsy_2_NC_010393(29)	5
SAL_PA7758AA	L3b	1973	Asia	China	No Transposon	0	No Integron	0	IncFII(S)_1, ColpVC_1	2	PHAGE_Phage_Gifsy_2_NC_010393(31), PHAGE_Entero_mEp237_NC_019704(3), PHAGE_Entero_ST104_NC_005841(47), PHAGE_Shigel_SfIV_NC_022749(2), PHAGE_Escher_500465_2_NC_049343(4), PHAGE_Clostr_c_st_NC_007581(2), PHAGE_Salmon_SJ46_NC_031129(3)	7
MY0189	L3b	1954	Asia	China	No Transposon	0	No Integron	0	IncFII(S)_1, ColpVC_1	2	PHAGE_Shigel_SfIV_NC_022749(2), PHAGE_Entero_ST104_NC_005841(51), PHAGE_Escher_500465_2_NC_049343(4), PHAGE_Burkho_BcepMu_NC_005882(2), PHAGE_Salmon_SJ46_NC_031129(3), PHAGE_Phage_Gifsy_2_NC_010393(32)	6
SAL04030	L3b	2017	Asia	China	No Transposon	0	In1440	1	IncFII(S)_1, IncN_1, ColpVC_1	3	PHAGE_Entero_ST104_NC_005841(47), PHAGE_Shigel_SfIV_NC_022749(2), PHAGE_Escher_500465_2_NC_049343(4), PHAGE_Burkho_BcepMu_NC_005882(2), PHAGE_Salmon_SJ46_NC_031129(3), PHAGE_Phage_Gifsy_2_NC_010393(31)	6
SAL02694	L3b	2018	Asia	China	No Transposon	0	In498	1	IncFII(S)_1, IncN_1, ColpVC_1	3	PHAGE_Shigel_SfIV_NC_022749(2), PHAGE_Entero_ST104_NC_005841(51), PHAGE_Escher_500465_2_NC_049343(4), PHAGE_Clostr_c_st_NC_007581(2), PHAGE_Salmon_SJ46_NC_031129(3), PHAGE_Phage_Gifsy_2_NC_010393(31), PHAGE_Salmon_Fels_1_NC_010391(4)	7
SAL00747	L3b	2017	Asia	China	Tn6205	1	No Integron	0	IncFII(S)_1, ColpVC_1	2	PHAGE_Shigel_SfIV_NC_022749(2), PHAGE_Escher_500465_2_NC_049343(4), PHAGE_Entero_ST104_NC_005841(49), PHAGE_Salmon_SJ46_NC_031129(3), PHAGE_Phage_Gifsy_2_NC_010393(32)	5
SAL_PA7711AA	L3b	1980	Asia	China	No Transposon	0	No Integron	0	IncFII(S)_1, ColpVC_1	2	PHAGE_Phage_Gifsy_2_NC_010393(31), PHAGE_Entero_mEp237_NC_019704(3), PHAGE_Entero_ST104_NC_005841(47), PHAGE_Shigel_SfIV_NC_022749(2), PHAGE_Salmon_SJ46_NC_031129(3), PHAGE_Escher_500465_2_NC_049343(4)	6
SAL_RB4558AA	L3b	2019	Europe	Denmark	No Transposon	0	No Integron	0	IncFII(S)_1, ColpVC_1	2	PHAGE_Salmon_SJ46_NC_031129(3), PHAGE_Phage_Gifsy_2_NC_010393(31), PHAGE_Shigel_SfIV_NC_022749(2), PHAGE_Entero_ST104_NC_005841(51), PHAGE_Escher_500465_2_NC_049343(4)	5
SRR24215048	L3b	2021	Europe	Netherland	No Transposon	0	No Integron	0	IncFII(S)_1, ColpVC_1	2	PHAGE_Shigel_SfIV_NC_022749(2), PHAGE_Entero_ST104_NC_005841(51), PHAGE_Escher_500465_2_NC_049343(4), PHAGE_Salmon_SJ46_NC_031129(3), PHAGE_Phage_Gifsy_2_NC_010393(31)	5
SAL00745	L3b	2017	Asia	China	No Transposon	0	In498	1	IncFII(S)_1, IncN_1, ColpVC_1	3	PHAGE_Shigel_SfIV_NC_022749(2), PHAGE_Entero_ST104_NC_005841(51), PHAGE_Salmon_Fels_1_NC_010391(4), PHAGE_Escher_500465_2_NC_049343(4), PHAGE_Clostr_c_st_NC_007581(2), PHAGE_Salmon_SJ46_NC_031129(3), PHAGE_Phage_Gifsy_2_NC_010393(30)	7
SAL_PA7724AA	L3b	1998	Asia	China	No Transposon	0	No Integron	0	IncFII(S)_1, ColpVC_1	2	PHAGE_Shigel_SfIV_NC_022749(2), PHAGE_Escher_500465_2_NC_049343(4), PHAGE_Phage_Gifsy_2_NC_010393(31), PHAGE_Salmon_SJ46_NC_031129(3)	4
SRR24215040	L3b	2021	Europe	Netherland	No Transposon	0	No Integron	0	IncFII(S)_1, ColpVC_1	2	PHAGE_Shigel_SfIV_NC_022749(2), PHAGE_Entero_ST104_NC_005841(51), PHAGE_Escher_500465_2_NC_049343(4), PHAGE_Salmon_SJ46_NC_031129(3), PHAGE_Phage_Gifsy_2_NC_010393(31)	5
SAL_PA7708AA	L3b	1986	Asia	China	No Transposon	0	No Integron	0	IncFII(S)_1, ColpVC_1	2	PHAGE_Clostr_c_st_NC_007581(2), PHAGE_Salmon_SJ46_NC_031129(3), PHAGE_Phage_Gifsy_2_NC_010393(30), PHAGE_Escher_500465_2_NC_049343(4), PHAGE_Shigel_SfIV_NC_022749(2), PHAGE_Entero_ST104_NC_005841(51)	6
ERS2630765	L3b	2013	Asia	China	No Transposon	0	No Integron	0	IncFII(S)_1	1	PHAGE_Salmon_SPN1S_NC_016761(2), PHAGE_Escher_500465_2_NC_049343(4), PHAGE_Phage_Gifsy_2_NC_010393(31), PHAGE_Entero_ST104_NC_005841(48), PHAGE_Shigel_SfIV_NC_022749(2), PHAGE_Salmon_SJ46_NC_031129(3)	6
ERS2630722	L3b	1967	Asia	China	No Transposon	0	No Integron	0	IncFII(S)_1	1	PHAGE_Entero_mEp237_NC_019704(3), PHAGE_Phage_Gifsy_2_NC_010393(29), PHAGE_Escher_500465_2_NC_049343(4), PHAGE_Shigel_SfIV_NC_022749(2), PHAGE_Salmon_SJ46_NC_031129(3), PHAGE_Entero_ST104_NC_005841(49)	6
SAL_PA7983AA	L3b	2007	Asia	China	No Transposon	0	No Integron	0	IncFII(S)_1, ColpVC_1	2	PHAGE_Phage_Gifsy_2_NC_010393(30), PHAGE_Escher_500465_2_NC_049343(4), PHAGE_Shigel_SfIV_NC_022749(2), PHAGE_Entero_ST104_NC_005841(51), PHAGE_Salmon_SJ46_NC_031129(3)	5
SAL_PA7705AA	L3b	1978	Asia	China	No Transposon	0	No Integron	0	IncFII(S)_1, ColpVC_1	2	PHAGE_Salmon_SJ46_NC_031129(3), PHAGE_Phage_Gifsy_2_NC_010393(30), PHAGE_Shigel_SfIV_NC_022749(2), PHAGE_Entero_ST104_NC_005841(51), PHAGE_Escher_500465_2_NC_049343(4)	5
ERS1867656	L3b	2012	Europe	Sweden	No Transposon	0	No Integron	0	IncFII(S)_1, ColpVC_1	2	PHAGE_Entero_mEp237_NC_019704(3), PHAGE_Phage_Gifsy_2_NC_010393(31), PHAGE_Phage_Gifsy_2_NC_010393(31), PHAGE_Entero_mEp237_NC_019704(3), PHAGE_Shigel_SfIV_NC_022749(2), PHAGE_Entero_ST104_NC_005841(51), PHAGE_Escher_500465_2_NC_049343(4), PHAGE_Burkho_BcepMu_NC_005882(2), PHAGE_Salmon_SJ46_NC_031129(3)	9
SAL02695	L3b	2018	Asia	China	No Transposon	0	In1440	1	IncFII(S)_1, IncN_1, ColpVC_1	3	PHAGE_Entero_ST104_NC_005841(47), PHAGE_Shigel_SfIV_NC_022749(2), PHAGE_Escher_500465_2_NC_049343(4), PHAGE_Salmon_SJ46_NC_031129(3), PHAGE_Phage_Gifsy_2_NC_010393(31)	5
ERS2630744	L3b	2006	Asia	China	No Transposon	0	In1440	1	IncFII(S)_1, IncN_1, ColpVC_1	3	PHAGE_Escher_500465_2_NC_049343(4), PHAGE_Phage_Gifsy_2_NC_010393(29), PHAGE_Shigel_SfIV_NC_022749(2), PHAGE_Entero_ST104_NC_005841(51), PHAGE_Salmon_Fels_1_NC_010391(4), PHAGE_Salmon_SJ46_NC_031129(3)	6
ERS2630738	L3b	1998	Asia	China	No Transposon	0	No Integron	0	IncFII(S)_1	1	PHAGE_Escher_500465_2_NC_049343(4), PHAGE_Entero_ST104_NC_005841(47), PHAGE_Shigel_SfIV_NC_022749(2), PHAGE_Salmon_SJ46_NC_031129(3), PHAGE_Phage_Gifsy_2_NC_010393(32)	5
SAL_PA7703AA	L3b	2008	Asia	China	No Transposon	0	In473	1	IncFII(S)_1, IncN_1, ColpVC_1	3	PHAGE_Salmon_SJ46_NC_031129(3), PHAGE_Escher_500465_2_NC_049343(4), PHAGE_Escher_RCS47_NC_042128(2), PHAGE_Shigel_SfIV_NC_022749(2), PHAGE_Entero_ST104_NC_005841(51), PHAGE_Phage_Gifsy_2_NC_010393(29)	6
SAL03285	L3b	2015	Asia	China	No Transposon	0	No Integron	0	IncFII(S)_1, ColpVC_1	2	PHAGE_Phage_Gifsy_2_NC_010393(32), PHAGE_Shigel_SfIV_NC_022749(2), PHAGE_Entero_ST104_NC_005841(51), PHAGE_Escher_500465_2_NC_049343(4), PHAGE_Salmon_SJ46_NC_031129(3)	5
SAL_PA7737AA	L3b	2008	Asia	China	No Transposon	0	In473	1	IncFII(S)_1, IncN_1, ColpVC_1	3	PHAGE_Shigel_SfIV_NC_022749(2), PHAGE_Entero_ST104_NC_005841(51), PHAGE_Salmon_SJ46_NC_031129(3), PHAGE_Phage_Gifsy_2_NC_010393(28), PHAGE_Escher_500465_2_NC_049343(4)	5
SAL_PA7968AA	L3b	1952	Europe	Denmark	No Transposon	0	No Integron	0	IncFII(S)_1, ColpVC_1	2	PHAGE_Salmon_SJ46_NC_031129(3), PHAGE_Shigel_SfIV_NC_022749(2), PHAGE_Phage_Gifsy_2_NC_010393(31), PHAGE_Escher_500465_2_NC_049343(4), PHAGE_Entero_ST104_NC_005841(49)	5
SAL_PA7975AA	L3b	1971	Asia	China	No Transposon	0	No Integron	0	IncFII(S)_1, ColpVC_1	2	PHAGE_Entero_ST104_NC_005841(49), PHAGE_Burkho_phiE255_NC_009237(2), PHAGE_Salmon_SJ46_NC_031129(3), PHAGE_Escher_500465_2_NC_049343(4), PHAGE_Shigel_SfIV_NC_022749(2), PHAGE_Phage_Gifsy_2_NC_010393(31)	6
SAL00714	L3b	2014	Asia	China	No Transposon	0	In1440	1	IncFII(S)_1, IncN_1, ColpVC_1	3	PHAGE_Shigel_SfIV_NC_022749(2), PHAGE_Entero_ST104_NC_005841(51), PHAGE_Escher_500465_2_NC_049343(4), PHAGE_Entero_mEp237_NC_019704(3), PHAGE_Phage_Gifsy_2_NC_010393(28), PHAGE_Burkho_BcepMu_NC_005882(2), PHAGE_Salmon_SJ46_NC_031129(3)	7
SAL03392	L3b	2013	Asia	China	No Transposon	0	No Integron	0	IncFII(S)_1, ColpVC_1	2	PHAGE_Entero_ST104_NC_005841(47), PHAGE_Shigel_SfIV_NC_022749(2), PHAGE_Escher_500465_2_NC_049343(4), PHAGE_Salmon_SJ46_NC_031129(3), PHAGE_Phage_Gifsy_2_NC_010393(32)	5
SRR24215039	L3b	2021	Europe	Netherland	No Transposon	0	No Integron	0	IncFII(S)_1, ColpVC_1	2	PHAGE_Shigel_SfIV_NC_022749(2), PHAGE_Entero_ST104_NC_005841(51), PHAGE_Escher_500465_2_NC_049343(4), PHAGE_Salmon_SJ46_NC_031129(3), PHAGE_Phage_Gifsy_2_NC_010393(31)	5
SAL03335	L3b	2015	Asia	China	No Transposon	0	No Integron	0	IncFII(S)_1, ColpVC_1	2	PHAGE_Entero_ST104_NC_005841(47), PHAGE_Shigel_SfIV_NC_022749(2), PHAGE_Escher_500465_2_NC_049343(4), PHAGE_Salmon_SJ46_NC_031129(3), PHAGE_Phage_Gifsy_2_NC_010393(32)	5
GCA_015024735.1	L3b	2013	Europe	Germany	No Transposon	0	No Integron	0	IncFII(S)_1, ColpVC_1	2	PHAGE_Salmon_Fels_1_NC_010391(5), PHAGE_Salmon_SJ46_NC_031129(3), PHAGE_Phage_Gifsy_2_NC_010393(32), PHAGE_Entero_ST104_NC_005841(47), PHAGE_Shigel_SfIV_NC_022749(2), PHAGE_Escher_500465_2_NC_049343(4)	6
SAL00742	L3b	2017	Asia	China	No Transposon	0	No Integron	0	IncFII(S)_1, ColpVC_1	2	PHAGE_Phage_Gifsy_2_NC_010393(29), PHAGE_Entero_ST104_NC_005841(48), PHAGE_Escher_500465_2_NC_049343(4), PHAGE_Burkho_phiE255_NC_009237(2), PHAGE_Salmon_SJ46_NC_031129(3)	5
SAL03313	L3b	2014	Asia	China	No Transposon	0	No Integron	0	IncFII(S)_1, ColpVC_1	2	PHAGE_Shigel_SfIV_NC_022749(2), PHAGE_Entero_ST104_NC_005841(51), PHAGE_Escher_500465_2_NC_049343(4), PHAGE_Burkho_BcepMu_NC_005882(2), PHAGE_Salmon_SJ46_NC_031129(3), PHAGE_Phage_Gifsy_2_NC_010393(32)	6
SAL_PA7974AA	L3b	1998	Asia	China	No Transposon	0	No Integron	0	IncFII(S)_1, ColpVC_1	2	PHAGE_Entero_ST104_NC_005841(37), PHAGE_Entero_ST104_NC_005841(12), PHAGE_Phage_Gifsy_2_NC_010393(31), PHAGE_Escher_500465_2_NC_049343(4), PHAGE_Shigel_SfIV_NC_022749(2), PHAGE_Salmon_SJ46_NC_031129(3)	6
SAL03446	L3b	2013	Asia	China	No Transposon	0	No Integron	0	IncFII(S)_1, ColpVC_1	2	PHAGE_Entero_mEp237_NC_019704(3), PHAGE_Phage_Gifsy_2_NC_010393(31), PHAGE_Entero_ST104_NC_005841(47), PHAGE_Shigel_SfIV_NC_022749(2), PHAGE_Escher_500465_2_NC_049343(4), PHAGE_Burkho_BcepMu_NC_005882(2), PHAGE_Salmon_SJ46_NC_031129(3)	7
SAL04023	L3b	2017	Asia	China	No Transposon	0	No Integron	0	IncFII(S)_1, ColpVC_1	2	PHAGE_Shigel_SfIV_NC_022749(2), PHAGE_Escher_500465_2_NC_049343(4), PHAGE_Salmon_SJ46_NC_031129(3), PHAGE_Phage_Gifsy_2_NC_010393(31)	4
SAL_PA7754AA	L3b	1986	Asia	China	No Transposon	0	No Integron	0	IncFII(S)_1, ColpVC_1	2	PHAGE_Salmon_SJ46_NC_031129(3), PHAGE_Phage_Gifsy_2_NC_010393(30), PHAGE_Escher_500465_2_NC_049343(4), PHAGE_Shigel_SfIV_NC_022749(2), PHAGE_Entero_ST104_NC_005841(51)	5
ERS2630732	L3b	1973	Asia	China	No Transposon	0	No Integron	0	IncFII(S)_1, ColpVC_1	2	PHAGE_Escher_500465_2_NC_049343(4), PHAGE_Entero_ST104_NC_005841(47), PHAGE_Shigel_SfIV_NC_022749(2), PHAGE_Salmon_SJ46_NC_031129(3), PHAGE_Phage_Gifsy_2_NC_010393(31)	5
SAL_PA7734AA	L3b	1994	Asia	China	No Transposon	0	No Integron	0	IncFII(S)_1, ColpVC_1	2	PHAGE_Salmon_SJ46_NC_031129(3), PHAGE_Entero_ST104_NC_005841(49), PHAGE_Shigel_SfIV_NC_022749(2), PHAGE_Phage_Gifsy_2_NC_010393(31), PHAGE_Escher_500465_2_NC_049343(4)	5
SAL00713	L3b	2014	Asia	China	No Transposon	0	In498	1	IncFII(S)_1, IncN_1, ColpVC_1	3	PHAGE_Entero_ST104_NC_005841(47), PHAGE_Shigel_SfIV_NC_022749(2), PHAGE_Escher_500465_2_NC_049343(4), PHAGE_Burkho_BcepMu_NC_005882(2), PHAGE_Salmon_SJ46_NC_031129(3), PHAGE_Phage_Gifsy_2_NC_010393(32)	6
SAL_PA7722AA	L3b	1997	Asia	China	No Transposon	0	No Integron	0	IncFII(S)_1, ColpVC_1	2	PHAGE_Burkho_BcepMu_NC_005882(2), PHAGE_Salmon_SJ46_NC_031129(3), PHAGE_Shigel_SfIV_NC_022749(2), PHAGE_Entero_ST104_NC_005841(49), PHAGE_Escher_500465_2_NC_049343(4), PHAGE_Phage_Gifsy_2_NC_010393(31), PHAGE_Entero_mEp237_NC_019704(3)	7
SAL03289	L3b	2015	Asia	China	No Transposon	0	In498	1	IncFII(S)_1, IncN_1, IncFIB(S)_1, ColpVC_1	4	PHAGE_Entero_ST104_NC_005841(46), PHAGE_Shigel_SfIV_NC_022749(2), PHAGE_Escher_500465_2_NC_049343(4), PHAGE_Rhodof_P26218_NC_029061(1), PHAGE_Burkho_phiE255_NC_009237(2), PHAGE_Salmon_SJ46_NC_031129(3), PHAGE_Salmon_118970_sal3_NC_031940(57), PHAGE_Phage_Gifsy_2_NC_010393(31), PHAGE_Phage_Gifsy_2_NC_010393(5)	9
ERS2630728	L3b	1986	Asia	China	No Transposon	0	No Integron	0	IncFII(S)_1, ColpVC_1	2	PHAGE_Salmon_Fels_1_NC_010391(4), PHAGE_Entero_ST104_NC_005841(46), PHAGE_Escher_500465_2_NC_049343(4), PHAGE_Shigel_SfIV_NC_022749(2), PHAGE_Burkho_BcepMu_NC_005882(2), PHAGE_Salmon_SJ46_NC_031129(3), PHAGE_Phage_Gifsy_2_NC_010393(30)	7
SAL_PA7716AA	L3b	2003	Asia	China	No Transposon	0	In498	1	IncFII(S)_1, IncN_1	2	PHAGE_Shigel_SfIV_NC_022749(2), PHAGE_Entero_ST104_NC_005841(51), PHAGE_Phage_Gifsy_2_NC_010393(28), PHAGE_Salmon_SJ46_NC_031129(3), PHAGE_Escher_500465_2_NC_049343(4)	5
SAL_PA7695AA	L3b	1998	Asia	China	Tn2012, Tn6205, Tn1721, Tn4, Tn801	5	No Integron	0	IncFII(S)_1, IncQ1_1	2	PHAGE_Phage_Gifsy_2_NC_010393(30), PHAGE_Shigel_SfIV_NC_022749(2), PHAGE_Clostr_c_st_NC_007581(2), PHAGE_Salmon_SJ46_NC_031129(3), PHAGE_Escher_500465_2_NC_049343(4)	5
SAL00736	L3b	2017	Asia	China	No Transposon	0	No Integron	0	IncFII(S)_1, ColpVC_1	2	PHAGE_Shigel_SfIV_NC_022749(2), PHAGE_Entero_ST104_NC_005841(48), PHAGE_Phage_Gifsy_2_NC_010393(30), PHAGE_Entero_mEp237_NC_019704(3), PHAGE_Escher_500465_2_NC_049343(4), PHAGE_Clostr_c_st_NC_007581(2), PHAGE_Salmon_SJ46_NC_031129(3)	7
SRR24215045	L3b	2021	Europe	Netherland	No Transposon	0	No Integron	0	IncFII(S)_1, ColpVC_1	2	PHAGE_Shigel_SfIV_NC_022749(2), PHAGE_Entero_ST104_NC_005841(51), PHAGE_Escher_500465_2_NC_049343(4), PHAGE_Salmon_SJ46_NC_031129(3), PHAGE_Phage_Gifsy_2_NC_010393(31)	5
SAL03391	L3b	2013	Asia	China	No Transposon	0	No Integron	0	IncFII(S)_1, ColpVC_1	2	PHAGE_Entero_mEp237_NC_019704(3), PHAGE_Phage_Gifsy_2_NC_010393(31), PHAGE_Shigel_SfIV_NC_022749(2), PHAGE_Entero_ST104_NC_005841(51), PHAGE_Escher_500465_2_NC_049343(4), PHAGE_Salmon_SJ46_NC_031129(3)	6
MY0185	L3b	2009	Asia	China	No Transposon	0	No Integron	0	IncFII(S)_1, ColpVC_1	2	PHAGE_Shigel_SfIV_NC_022749(2), PHAGE_Entero_ST104_NC_005841(48), PHAGE_Escher_500465_2_NC_049343(4), PHAGE_Salmon_SJ46_NC_031129(3), PHAGE_Phage_Gifsy_2_NC_010393(32)	5
ERS2630718	L3b	1962	Asia	China	No Transposon	0	No Integron	0	IncFII(S)_1, ColpVC_1	2	PHAGE_Salmon_Fels_1_NC_010391(5), PHAGE_Shigel_SfIV_NC_022749(2), PHAGE_Entero_ST104_NC_005841(51), PHAGE_Escher_500465_2_NC_049343(4), PHAGE_Salmon_SJ46_NC_031129(3), PHAGE_Phage_Gifsy_2_NC_010393(32)	6
SAL03388	L3b	2011	Asia	China	Tn801	1	No Integron	0	IncFII(S)_1, IncX1_1, ColpVC_1	3	PHAGE_Shigel_SfIV_NC_022749(2), PHAGE_Entero_ST104_NC_005841(51), PHAGE_Escher_500465_2_NC_049343(4), PHAGE_Salmon_SJ46_NC_031129(3), PHAGE_Salmon_SJ46_NC_031129(6), PHAGE_Phage_Gifsy_2_NC_010393(32), PHAGE_Yersin_L_413C_NC_004745(18), PHAGE_Salmon_RE_2010_NC_019488(21)	8
SAL_PA7693AA	L3b	2012	Asia	China	No Transposon	0	No Integron	0	IncFII(S)_1, ColpVC_1	2	PHAGE_Clostr_c_st_NC_007581(2), PHAGE_Salmon_SJ46_NC_031129(3), PHAGE_Phage_Gifsy_2_NC_010393(30), PHAGE_Escher_500465_2_NC_049343(4), PHAGE_Shigel_SfIV_NC_022749(2), PHAGE_Entero_ST104_NC_005841(51)	6
SAL_FB2386AA	L3b	2017	not collected	not collected	No Transposon	0	No Integron	0	IncFII(S)_1, ColpVC_1	2	PHAGE_Salmon_SJ46_NC_031129(3), PHAGE_Phage_Gifsy_2_NC_010393(31), PHAGE_Shigel_SfIV_NC_022749(2), PHAGE_Entero_ST104_NC_005841(51), PHAGE_Escher_500465_2_NC_049343(4)	5
SAL_PA7736AA	L3b	2004	Asia	China	No Transposon	0	No Integron	0	IncFII(S)_1	1	PHAGE_Shigel_SfIV_NC_022749(2), PHAGE_Escher_500465_2_NC_049343(4), PHAGE_Salmon_SJ46_NC_031129(3), PHAGE_Entero_ST104_NC_005841(49), PHAGE_Phage_Gifsy_2_NC_010393(30)	5
ERS1867658	L3b	2012	Europe	Sweden	No Transposon	0	No Integron	0	IncFII(S)_1, ColpVC_1	2	PHAGE_Shigel_SfIV_NC_022749(2), PHAGE_Entero_ST104_NC_005841(51), PHAGE_Escher_500465_2_NC_049343(4), PHAGE_Phage_Gifsy_2_NC_010393(28), PHAGE_Entero_mEp237_NC_019704(3), PHAGE_Salmon_SJ46_NC_031129(3), PHAGE_Phage_Gifsy_2_NC_010393(5)	7
SAL03319	L3b	2014	Asia	China	Tn6205	1	No Integron	0	IncFII(S)_1, IncQ1_1, ColpVC_1	3	PHAGE_Shigel_SfIV_NC_022749(2), PHAGE_Entero_ST104_NC_005841(51), PHAGE_Escher_500465_2_NC_049343(4), PHAGE_Clostr_c_st_NC_007581(2), PHAGE_Salmon_SJ46_NC_031129(3), PHAGE_Phage_Gifsy_2_NC_010393(32)	6
ERS2630729	L3b	1986	Asia	China	No Transposon	0	No Integron	0	IncFII(S)_1, ColpVC_1	2	PHAGE_Shigel_SfIV_NC_022749(2), PHAGE_Entero_ST104_NC_005841(51), PHAGE_Escher_500465_2_NC_049343(4), PHAGE_Burkho_phiE255_NC_009237(2), PHAGE_Salmon_SJ46_NC_031129(3), PHAGE_Phage_Gifsy_2_NC_010393(30)	6
GCA_015024675.1	L3b	2013	Europe	Germany	No Transposon	0	No Integron	0	IncFII(S)_1, ColpVC_1	2	PHAGE_Salmon_Fels_1_NC_010391(4), PHAGE_Burkho_phiE255_NC_009237(2), PHAGE_Salmon_SJ46_NC_031129(3), PHAGE_Phage_Gifsy_2_NC_010393(32), PHAGE_Entero_ST104_NC_005841(47), PHAGE_Shigel_SfIV_NC_022749(2), PHAGE_Escher_500465_2_NC_049343(4)	7
ERS1867655	L3b	2012	Europe	Sweden	No Transposon	0	No Integron	0	IncFII(S)_1, ColpVC_1	2	PHAGE_Shigel_SfIV_NC_022749(2), PHAGE_Entero_ST104_NC_005841(51), PHAGE_Escher_500465_2_NC_049343(4), PHAGE_Burkho_BcepMu_NC_005882(2), PHAGE_Salmon_SJ46_NC_031129(3), PHAGE_Phage_Gifsy_2_NC_010393(32)	6
SAL00710	L3b	2014	Asia	China	No Transposon	0	No Integron	0	IncFII(S)_1, ColpVC_1	2	PHAGE_Shigel_SfIV_NC_022749(2), PHAGE_Escher_500465_2_NC_049343(4), PHAGE_Entero_mEp237_NC_019704(3), PHAGE_Phage_Gifsy_2_NC_010393(30), PHAGE_Salmon_SJ46_NC_031129(3), PHAGE_Entero_ST104_NC_005841(49)	6
SAL03404	L3b	2012	Asia	China	No Transposon	0	In498	1	IncFII(S)_1, IncN_1, ColpVC_1	3	PHAGE_Entero_ST104_NC_005841(47), PHAGE_Shigel_SfIV_NC_022749(2), PHAGE_Phage_Gifsy_2_NC_010393(29), PHAGE_Entero_mEp237_NC_019704(3), PHAGE_Escher_500465_2_NC_049343(4), PHAGE_Clostr_c_st_NC_007581(2), PHAGE_Salmon_SJ46_NC_031129(3), PHAGE_Salmon_Fels_1_NC_010391(5)	8
SAL03317	L3b	2014	Asia	China	No Transposon	0	No Integron	0	IncFII(S)_1, ColpVC_1	2	PHAGE_Shigel_SfIV_NC_022749(2), PHAGE_Entero_ST104_NC_005841(51), PHAGE_Escher_500465_2_NC_049343(4), PHAGE_Burkho_BcepMu_NC_005882(2), PHAGE_Salmon_SJ46_NC_031129(3), PHAGE_Phage_Gifsy_2_NC_010393(32)	6
E388-2	L3b	2023	Asia	China	No Transposon	0	No Integron	0	IncFII(S)_1, ColpVC_1	2	PHAGE_Shigel_SfIV_NC_022749(2), PHAGE_Entero_ST104_NC_005841(51), PHAGE_Escher_500465_2_NC_049343(4), PHAGE_Burkho_phiE255_NC_009237(2), PHAGE_Salmon_SJ46_NC_031129(3), PHAGE_Phage_Gifsy_2_NC_010393(31)	6
SRR24215037	L3b	2021	Europe	Netherland	No Transposon	0	No Integron	0	IncFII(S)_1, ColpVC_1	2	PHAGE_Shigel_SfIV_NC_022749(2), PHAGE_Entero_ST104_NC_005841(51), PHAGE_Escher_500465_2_NC_049343(4), PHAGE_Salmon_SJ46_NC_031129(3), PHAGE_Phage_Gifsy_2_NC_010393(31)	5
SRR24215047	L3b	2021	Europe	Netherland	No Transposon	0	No Integron	0	IncFII(S)_1, ColpVC_1	2	PHAGE_Shigel_SfIV_NC_022749(2), PHAGE_Entero_ST104_NC_005841(51), PHAGE_Escher_500465_2_NC_049343(4), PHAGE_Escher_500465_1_NC_049342(12), PHAGE_Salmon_SJ46_NC_031129(3), PHAGE_Phage_Gifsy_2_NC_010393(31)	6
SAL04036	L3b	2017	Asia	China	No Transposon	0	No Integron	0	IncFII(S)_1, ColpVC_1	2	PHAGE_Shigel_SfIV_NC_022749(2), PHAGE_Entero_ST104_NC_005841(51), PHAGE_Escher_500465_2_NC_049343(4), PHAGE_Salmon_SJ46_NC_031129(3), PHAGE_Phage_Gifsy_2_NC_010393(31)	5
E392-2	L3b	2023	Asia	China	No Transposon	0	No Integron	0	IncFII(S)_1, ColpVC_1	2	PHAGE_Entero_ST104_NC_005841(47), PHAGE_Shigel_SfIV_NC_022749(2), PHAGE_Escher_500465_2_NC_049343(4), PHAGE_Clostr_c_st_NC_007581(2), PHAGE_Salmon_SJ46_NC_031129(3), PHAGE_Phage_Gifsy_2_NC_010393(30)	6
ERS1867653	L3b	2012	Europe	Sweden	No Transposon	0	No Integron	0	IncFII(S)_1	1	PHAGE_Entero_mEp237_NC_019704(3), PHAGE_Phage_Gifsy_2_NC_010393(31), PHAGE_Phage_Gifsy_2_NC_010393(31), PHAGE_Entero_mEp237_NC_019704(3), PHAGE_Entero_ST104_NC_005841(47), PHAGE_Shigel_SfIV_NC_022749(2), PHAGE_Escher_500465_2_NC_049343(4), PHAGE_Salmon_SJ46_NC_031129(3), PHAGE_Salmon_FelixO1_NC_005282(92)	9
SAL03333	L3b	2014	Asia	China	No Transposon	0	In1440	1	IncFII(S)_1, IncN_1, ColpVC_1	3	PHAGE_Entero_ST104_NC_005841(47), PHAGE_Shigel_SfIV_NC_022749(2), PHAGE_Entero_mEp237_NC_019704(3), PHAGE_Phage_Gifsy_2_NC_010393(29), PHAGE_Escher_500465_2_NC_049343(4), PHAGE_Burkho_phiE255_NC_009237(2), PHAGE_Salmon_SJ46_NC_031129(3), PHAGE_Phage_Gifsy_2_NC_010393(5)	8
SAL02703	L3b	2018	Asia	China	Tn6292	1	In498	1	IncFII(S)_1, IncN_1, ColpVC_1	3	PHAGE_Shigel_SfIV_NC_022749(2), PHAGE_Entero_ST104_NC_005841(51), PHAGE_Phage_Gifsy_2_NC_010393(29), PHAGE_Entero_mEp237_NC_019704(3), PHAGE_Escher_500465_2_NC_049343(4), PHAGE_Salmon_SJ46_NC_031129(3)	6
SAL_PA7976AA	L3b	2003	Asia	China	Tn2012, Tn801, Tn6205	3	No Integron	0	IncFII(S)_1, IncQ1_1, ColpVC_1	3	PHAGE_Phage_Gifsy_2_NC_010393(31), PHAGE_Escher_500465_2_NC_049343(4), PHAGE_Salmon_SJ46_NC_031129(3), PHAGE_Shigel_SfIV_NC_022749(2)	4
SAL03442	L3b	2013	Asia	China	No Transposon	0	No Integron	0	IncFII(S)_1	1	PHAGE_Entero_ST104_NC_005841(47), PHAGE_Shigel_SfIV_NC_022749(2), PHAGE_Escher_500465_2_NC_049343(4), PHAGE_Burkho_BcepMu_NC_005882(2), PHAGE_Salmon_SJ46_NC_031129(3), PHAGE_Phage_Gifsy_2_NC_010393(32)	6
SAL04021	L3b	2017	Asia	China	No Transposon	0	No Integron	0	IncFII(S)_1, ColpVC_1	2	PHAGE_Shigel_SfIV_NC_022749(2), PHAGE_Escher_500465_2_NC_049343(4), PHAGE_Salmon_SJ46_NC_031129(3), PHAGE_Phage_Gifsy_2_NC_010393(31)	4
E388-1	L3b	2023	Asia	China	No Transposon	0	No Integron	0	IncFII(S)_1, ColpVC_1	2	PHAGE_Entero_ST104_NC_005841(47), PHAGE_Shigel_SfIV_NC_022749(2), PHAGE_Escher_500465_2_NC_049343(4), PHAGE_Burkho_BcepMu_NC_005882(2), PHAGE_Salmon_SJ46_NC_031129(3), PHAGE_Phage_Gifsy_2_NC_010393(31)	6
SAL02680	L3b	2013	Asia	China	No Transposon	0	In498	1	IncFII(S)_1, IncN_1, ColpVC_1	3	PHAGE_Shigel_SfIV_NC_022749(2), PHAGE_Entero_ST104_NC_005841(51), PHAGE_Escher_500465_2_NC_049343(4), PHAGE_Salmon_SJ46_NC_031129(3), PHAGE_Phage_Gifsy_2_NC_010393(31)	5
SAL00711	L3b	2014	Asia	China	No Transposon	0	In498	1	IncFII(S)_1, IncN_1, ColpVC_1	3	PHAGE_Escher_500465_2_NC_049343(4), PHAGE_Clostr_c_st_NC_007581(2), PHAGE_Salmon_SJ46_NC_031129(3), PHAGE_Entero_ST104_NC_005841(49), PHAGE_Phage_Gifsy_2_NC_010393(31)	5
SAL03443	L3b	2013	Asia	China	No Transposon	0	No Integron	0	IncFII(S)_1	1	PHAGE_Phage_Gifsy_2_NC_010393(31), PHAGE_Entero_mEp237_NC_019704(3), PHAGE_Shigel_SfIV_NC_022749(2), PHAGE_Escher_500465_2_NC_049343(4), PHAGE_Salmon_SJ46_NC_031129(3)	5
SAL02696	L3b	2018	Asia	China	Tn6292	1	In498	1	IncFII(S)_1, IncN_1, ColpVC_1	3	PHAGE_Entero_ST104_NC_005841(47), PHAGE_Shigel_SfIV_NC_022749(2), PHAGE_Phage_Gifsy_2_NC_010393(29), PHAGE_Entero_mEp237_NC_019704(3), PHAGE_Escher_500465_2_NC_049343(4), PHAGE_Burkho_BcepMu_NC_005882(2), PHAGE_Salmon_SJ46_NC_031129(3), PHAGE_Phage_Gifsy_2_NC_010393(5)	8
SAL_PA7747AA	L3b	1998	Asia	China	No Transposon	0	No Integron	0	IncFII(S)_1, ColpVC_1	2	PHAGE_Entero_ST104_NC_005841(49), PHAGE_Shigel_SfIV_NC_022749(2), PHAGE_Escher_500465_2_NC_049343(4), PHAGE_Phage_Gifsy_2_NC_010393(28), PHAGE_Clostr_c_st_NC_007581(2), PHAGE_Salmon_SJ46_NC_031129(3)	6
SAL04033	L3b	2017	Asia	China	No Transposon	0	No Integron	0	IncFII(S)_1, ColpVC_1	2	PHAGE_Shigel_SfIV_NC_022749(2), PHAGE_Entero_ST104_NC_005841(51), PHAGE_Escher_500465_2_NC_049343(4), PHAGE_Salmon_SJ46_NC_031129(3), PHAGE_Phage_Gifsy_2_NC_010393(32)	5
SAL_PA7741AA	L3b	1965	Asia	China	Tn6205	1	No Integron	0	IncFII(S)_1, IncQ1_1, ColpVC_1	3	PHAGE_Salmon_SJ46_NC_031129(3), PHAGE_Shigel_SfIV_NC_022749(2), PHAGE_Escher_500465_2_NC_049343(4), PHAGE_Phage_Gifsy_2_NC_010393(30), PHAGE_Entero_ST104_NC_005841(49)	5
SRR24215049	L3b	2021	Europe	Netherland	No Transposon	0	No Integron	0	IncFII(S)_1, ColpVC_1	2	PHAGE_Shigel_SfIV_NC_022749(2), PHAGE_Entero_ST104_NC_005841(51), PHAGE_Escher_500465_2_NC_049343(4), PHAGE_Klebsi_4LV2017_NC_047818(18), PHAGE_Salmon_SJ46_NC_031129(3), PHAGE_Phage_Gifsy_2_NC_010393(31)	6
SAL02697	L3b	2018	Asia	China	No Transposon	0	In498	1	IncFII(S)_1, IncN_1, ColpVC_1	3	PHAGE_Entero_ST104_NC_005841(47), PHAGE_Shigel_SfIV_NC_022749(2), PHAGE_Escher_500465_2_NC_049343(4), PHAGE_Salmon_SJ46_NC_031129(3), PHAGE_Phage_Gifsy_2_NC_010393(31), PHAGE_Salmon_Fels_1_NC_010391(5)	6
SAL_FB2384AA	L3b	2017	not collected	not collected	No Transposon	0	No Integron	0	IncFII(S)_1, ColpVC_1	2	PHAGE_Burkho_phiE255_NC_009237(2), PHAGE_Salmon_SJ46_NC_031129(3), PHAGE_Phage_Gifsy_2_NC_010393(32), PHAGE_Entero_ST104_NC_005841(47), PHAGE_Shigel_SfIV_NC_022749(2), PHAGE_Escher_500465_2_NC_049343(4)	6
SRR24215034	L3b	2021	Europe	Netherland	No Transposon	0	No Integron	0	IncFII(S)_1, ColpVC_1	2	PHAGE_Shigel_SfIV_NC_022749(2), PHAGE_Entero_ST104_NC_005841(51), PHAGE_Escher_500465_2_NC_049343(4), PHAGE_Salmon_SJ46_NC_031129(3), PHAGE_Phage_Gifsy_2_NC_010393(31)	5
ERS2630739	L3b	1998	Asia	China	No Transposon	0	No Integron	0	IncFII(S)_1, ColpVC_1	2	PHAGE_Phage_Gifsy_2_NC_010393(31), PHAGE_Escher_500465_2_NC_049343(4), PHAGE_Shigel_SfIV_NC_022749(2), PHAGE_Entero_ST104_NC_005841(48), PHAGE_Salmon_Fels_1_NC_010391(3), PHAGE_Burkho_phiE255_NC_009237(2), PHAGE_Salmon_SJ46_NC_031129(3)	7
SAL03396	L3b	2014	Asia	China	No Transposon	0	No Integron	0	IncFII(S)_1, ColpVC_1	2	PHAGE_Phage_Gifsy_2_NC_010393(31), PHAGE_Entero_mEp237_NC_019704(3), PHAGE_Shigel_SfIV_NC_022749(2), PHAGE_Entero_ST104_NC_005841(51), PHAGE_Escher_500465_2_NC_049343(4), PHAGE_Burkho_BcepMu_NC_005882(2), PHAGE_Salmon_SJ46_NC_031129(3)	7
SAL03316	L3b	2014	Asia	China	No Transposon	0	In1440	1	IncFII(S)_1, IncN_1, ColpVC_1	3	PHAGE_Entero_ST104_NC_005841(47), PHAGE_Shigel_SfIV_NC_022749(2), PHAGE_Phage_Gifsy_2_NC_010393(29), PHAGE_Entero_mEp237_NC_019704(3), PHAGE_Escher_500465_2_NC_049343(4), PHAGE_Burkho_BcepMu_NC_005882(2), PHAGE_Salmon_SJ46_NC_031129(3), PHAGE_Salmon_Fels_1_NC_010391(5)	8
SAL_PA7700AA	L3b	1998	Asia	China	Tn2012, Tn6205, Tn4, Tn801	4	No Integron	0	IncFII(S)_1, IncQ1_1, ColpVC_1	3	PHAGE_Salmon_SJ46_NC_031129(6), PHAGE_Escher_500465_2_NC_049343(4), PHAGE_Shigel_SfIV_NC_022749(2), PHAGE_Phage_Gifsy_2_NC_010393(29), PHAGE_Salmon_SJ46_NC_031129(3)	5
SAL03337	L3b	2015	Asia	China	No Transposon	0	No Integron	0	IncFII(S)_1, IncFIB(S)_1, ColpVC_1	3	PHAGE_Shigel_POCJ13_NC_025434(3), PHAGE_Escher_500465_2_NC_049343(4), PHAGE_Entero_ST104_NC_005841(51), PHAGE_Salmon_118970_sal3_NC_031940(57), PHAGE_Salmon_SJ46_NC_031129(3), PHAGE_Phage_Gifsy_2_NC_010393(31)	6
SAL03320	L3b	2014	Asia	China	Tn6205	1	No Integron	0	IncFII(S)_1, IncQ1_1, ColpVC_1	3	PHAGE_Shigel_SfIV_NC_022749(2), PHAGE_Entero_ST104_NC_005841(51), PHAGE_Escher_500465_2_NC_049343(4), PHAGE_Burkho_phiE255_NC_009237(2), PHAGE_Salmon_SJ46_NC_031129(3), PHAGE_Phage_Gifsy_2_NC_010393(32)	6
SRR24215043	L3b	2021	Europe	Netherland	No Transposon	0	No Integron	0	IncFII(S)_1, ColpVC_1	2	PHAGE_Shigel_SfIV_NC_022749(2), PHAGE_Entero_ST104_NC_005841(51), PHAGE_Escher_500465_2_NC_049343(4), PHAGE_Salmon_SJ46_NC_031129(3), PHAGE_Phage_Gifsy_2_NC_010393(31)	5
SAL03312	L3b	2014	Asia	China	Tn801	1	In498	1	IncFII(S)_1, IncN_1, IncX1_1, ColpVC_1	4	PHAGE_Shigel_SfIV_NC_022749(2), PHAGE_Entero_ST104_NC_005841(48), PHAGE_Escher_500465_2_NC_049343(4), PHAGE_Klebsi_Seifer_NC_048732(1), PHAGE_Burkho_phiE255_NC_009237(2), PHAGE_Salmon_SJ46_NC_031129(3), PHAGE_Salmon_118970_sal3_NC_031940(57), PHAGE_Phage_Gifsy_2_NC_010393(31), PHAGE_Escher_pro483_NC_028943(27), PHAGE_Phage_Gifsy_2_NC_010393(5)	10
TH184	L3b	2022	Asia	China	No Transposon	0	No Integron	0	IncFII(S)_1, ColpVC_1	2	PHAGE_Shigel_SfIV_NC_022749(2), PHAGE_Entero_ST104_NC_005841(51), PHAGE_Escher_500465_2_NC_049343(4), PHAGE_Clostr_c_st_NC_007581(2), PHAGE_Salmon_SJ46_NC_031129(3), PHAGE_Phage_Gifsy_2_NC_010393(31)	6
SAL_PA7746AA	L3b	2012	Asia	China	No Transposon	0	No Integron	0	IncFII(S)_1	1	PHAGE_Shigel_SfIV_NC_022749(2), PHAGE_Salmon_SJ46_NC_031129(3), PHAGE_Burkho_BcepMu_NC_005882(2), PHAGE_Escher_500465_2_NC_049343(4), PHAGE_Entero_ST104_NC_005841(49), PHAGE_Phage_Gifsy_2_NC_010393(30)	6
SAL00705	L3b	2014	Asia	China	Tn6205	1	No Integron	0	IncFII(S)_1, IncQ1_1, ColpVC_1, ColE10_1	4	PHAGE_Shigel_SfIV_NC_022749(2), PHAGE_Escher_500465_2_NC_049343(4), PHAGE_Entero_mEp237_NC_019704(3), PHAGE_Phage_Gifsy_2_NC_010393(28), PHAGE_Entero_ST104_NC_005841(49), PHAGE_Salmon_SJ46_NC_031129(3)	6
ERS2630724	L3b	1968	Asia	China	No Transposon	0	No Integron	0	IncFII(S)_1, ColpVC_1	2	PHAGE_Phage_Gifsy_2_NC_010393(31), PHAGE_Entero_ST104_NC_005841(47), PHAGE_Shigel_SfIV_NC_022749(2), PHAGE_Escher_500465_2_NC_049343(4), PHAGE_Salmon_SJ46_NC_031129(3)	5
SAL03385	L3b	1978	Asia	China	Tn801	1	No Integron	0	IncFII(S)_1, IncX1_1, ColpVC_1	3	PHAGE_Shigel_SfIV_NC_022749(2), PHAGE_Entero_ST104_NC_005841(51), PHAGE_Escher_500465_2_NC_049343(4), PHAGE_Escher_pro483_NC_028943(26), PHAGE_Salmon_SJ46_NC_031129(3), PHAGE_Salmon_SJ46_NC_031129(6), PHAGE_Phage_Gifsy_2_NC_010393(32), PHAGE_Escher_500465_1_NC_049342(28)	8
SAL03444	L3b	2013	Asia	China	No Transposon	0	No Integron	0	IncFII(S)_1, ColpVC_1, IncX1_1	3	PHAGE_Shigel_SfIV_NC_022749(2), PHAGE_Entero_ST104_NC_005841(51), PHAGE_Escher_500465_2_NC_049343(4), PHAGE_Salmon_SJ46_NC_031129(3), PHAGE_Phage_Gifsy_2_NC_010393(32)	5
SRR24215046	L3b	2021	Europe	Netherland	No Transposon	0	No Integron	0	IncFII(S)_1, ColpVC_1	2	PHAGE_Escher_500465_2_NC_049343(4), PHAGE_Shigel_SfIV_NC_022749(2), PHAGE_Entero_ST104_NC_005841(49), PHAGE_Salmon_SJ46_NC_031129(3), PHAGE_Phage_Gifsy_2_NC_010393(31)	5
SAL_PA7713AA	L3b	1965	Asia	China	No Transposon	0	No Integron	0	IncFII(S)_1, ColpVC_1	2	PHAGE_Shigel_SfIV_NC_022749(2), PHAGE_Entero_ST104_NC_005841(51), PHAGE_Salmon_SJ46_NC_031129(3), PHAGE_Phage_Gifsy_2_NC_010393(30), PHAGE_Escher_500465_2_NC_049343(4)	5
SAL_PA7707AA	L3b	2012	Asia	China	No Transposon	0	In1440	1	IncFII(S)_1, IncN_1, ColpVC_1	3	PHAGE_Escher_500465_2_NC_049343(4), PHAGE_Entero_ST104_NC_005841(49), PHAGE_Salmon_SJ46_NC_031129(3), PHAGE_Phage_Gifsy_2_NC_010393(28), PHAGE_Shigel_SfIV_NC_022749(2)	5
SAL00707	L3b	2014	Asia	China	No Transposon	0	No Integron	0	IncFII(S)_1, ColpVC_1	2	PHAGE_Escher_500465_2_NC_049343(4), PHAGE_Shigel_SfIV_NC_022749(2), PHAGE_Entero_ST104_NC_005841(48), PHAGE_Salmon_SJ46_NC_031129(3), PHAGE_Phage_Gifsy_2_NC_010393(32)	5
SAL_PA7750AA	L3b	2008	Asia	China	No Transposon	0	No Integron	0	IncFII(S)_1, ColpVC_1	2	PHAGE_Phage_Gifsy_2_NC_010393(28), PHAGE_Salmon_SJ46_NC_031129(3), PHAGE_Escher_500465_2_NC_049343(4), PHAGE_Shigel_SfIV_NC_022749(2), PHAGE_Entero_ST104_NC_005841(49)	5
SAL_PA7970AA	L3b	2009	Asia	China	No Transposon	0	In498	1	IncFII(S)_1, IncN_1, ColpVC_1	3	PHAGE_Phage_Gifsy_2_NC_010393(28), PHAGE_Salmon_SJ46_NC_031129(3), PHAGE_Entero_ST104_NC_005841(49), PHAGE_Shigel_SfIV_NC_022749(2), PHAGE_Escher_500465_2_NC_049343(4), PHAGE_Escher_RCS47_NC_042128(2)	6
SAL03445	L3b	2013	Asia	China	No Transposon	0	No Integron	0	IncFII(S)_1	1	PHAGE_Shigel_SfIV_NC_022749(2), PHAGE_Entero_ST104_NC_005841(51), PHAGE_Escher_500465_2_NC_049343(4), PHAGE_Salmon_SJ46_NC_031129(3), PHAGE_Phage_Gifsy_2_NC_010393(32)	5
E392-1	L3b	2023	Asia	China	No Transposon	0	No Integron	0	IncFII(S)_1, ColpVC_1	2	PHAGE_Shigel_SfIV_NC_022749(2), PHAGE_Entero_ST104_NC_005841(51), PHAGE_Escher_500465_2_NC_049343(4), PHAGE_Clostr_c_st_NC_007581(2), PHAGE_Salmon_SJ46_NC_031129(3), PHAGE_Phage_Gifsy_2_NC_010393(30)	6
SAL_PA7977AA	L3b	2006	Asia	China	No Transposon	0	No Integron	0	IncFII(S)_1	1	PHAGE_Phage_Gifsy_2_NC_010393(31), PHAGE_Shigel_SfIV_NC_022749(2), PHAGE_Salmon_SJ46_NC_031129(3), PHAGE_Escher_500465_2_NC_049343(4)	4
SAL_EA6570AA	L3b	2012	not collected	not collected	No Transposon	0	No Integron	0	IncFII(S)_1, ColpVC_1	2	PHAGE_Salmon_SJ46_NC_031129(3), PHAGE_Phage_Gifsy_2_NC_010393(31), PHAGE_Shigel_SfIV_NC_022749(2), PHAGE_Entero_ST104_NC_005841(51), PHAGE_Escher_500465_2_NC_049343(4)	5
SAL_PA7749AA	L3b	1967	Asia	China	No Transposon	0	No Integron	0	IncFII(S)_1, ColpVC_1	2	PHAGE_Salmon_SJ46_NC_031129(3), PHAGE_Escher_500465_2_NC_049343(4), PHAGE_Shigel_SfIV_NC_022749(2), PHAGE_Entero_ST104_NC_005841(51), PHAGE_Phage_Gifsy_2_NC_010393(30)	5
SAL_PA7753AA	L3b	2005	Asia	China	No Transposon	0	In498	1	IncFII(S)_1, IncN_1, ColpVC_1	3	PHAGE_Escher_500465_2_NC_049343(4), PHAGE_Shigel_SfIV_NC_022749(2), PHAGE_Entero_ST104_NC_005841(49), PHAGE_Phage_Gifsy_2_NC_010393(31), PHAGE_Salmon_SJ46_NC_031129(3)	5
SAL00740	L3b	2017	Asia	China	Tn6205	1	No Integron	0	IncFII(S)_1, ColE10_1, ColpVC_1	3	PHAGE_Entero_ST104_NC_005841(46), PHAGE_Shigel_SfIV_NC_022749(2), PHAGE_Escher_500465_2_NC_049343(4), PHAGE_Burkho_phiE255_NC_009237(2), PHAGE_Salmon_SJ46_NC_031129(3), PHAGE_Phage_Gifsy_2_NC_010393(31)	6
SAL03390	L3b	2012	Asia	China	No Transposon	0	No Integron	0	IncFII(S)_1, ColpVC_1	2	PHAGE_Phage_Gifsy_2_NC_010393(31), PHAGE_Entero_ST104_NC_005841(47), PHAGE_Shigel_SfIV_NC_022749(2), PHAGE_Escher_500465_2_NC_049343(4), PHAGE_Salmon_SJ46_NC_031129(3)	5
E393-1	L3b	2023	Asia	China	No Transposon	0	No Integron	0	IncFII(S)_1, ColpVC_1	2	PHAGE_Shigel_SfIV_NC_022749(2), PHAGE_Entero_ST104_NC_005841(51), PHAGE_Escher_500465_2_NC_049343(4), PHAGE_Salmon_SJ46_NC_031129(3), PHAGE_Phage_Gifsy_2_NC_010393(30)	5
SAL03322	L3b	2014	Asia	China	No Transposon	0	In473	1	IncFII(S)_1, IncN_1, ColpVC_1	3	PHAGE_Entero_ST104_NC_005841(47), PHAGE_Shigel_SfIV_NC_022749(2), PHAGE_Entero_mEp237_NC_019704(3), PHAGE_Phage_Gifsy_2_NC_010393(29), PHAGE_Escher_500465_2_NC_049343(4), PHAGE_Clostr_c_st_NC_007581(2), PHAGE_Salmon_SJ46_NC_031129(3), PHAGE_Burkho_KS14_NC_015273(2), PHAGE_Salmon_Fels_1_NC_010391(5)	9
SAL_PA0702AA	L3b	1962	Asia	China	Tn6205	1	No Integron	0	IncFII(S)_1, IncQ1_1, ColpVC_1	3	PHAGE_Escher_500465_2_NC_049343(4), PHAGE_Salmon_SJ46_NC_031129(3), PHAGE_Phage_Gifsy_2_NC_010393(30), PHAGE_Shigel_SfIV_NC_022749(2), PHAGE_Entero_ST104_NC_005841(51)	5
SAL_PA7752AA	L3b	2014	Asia	China	No Transposon	0	In498	1	IncFII(S)_1, IncN_1, ColpVC_1	3	PHAGE_Burkho_phiE255_NC_009237(2), PHAGE_Salmon_SJ46_NC_031129(3), PHAGE_Shigel_SfIV_NC_022749(2), PHAGE_Phage_Gifsy_2_NC_010393(31), PHAGE_Escher_500465_2_NC_049343(4), PHAGE_Entero_ST104_NC_005841(48)	6
SAL_PA7706AA	L3b	1979	Asia	China	No Transposon	0	No Integron	0	IncFII(S)_1, ColpVC_1	2	PHAGE_Escher_500465_2_NC_049343(4), PHAGE_Entero_ST104_NC_005841(49), PHAGE_Phage_Gifsy_2_NC_010393(30), PHAGE_Shigel_SfIV_NC_022749(2), PHAGE_Burkho_BcepMu_NC_005882(2), PHAGE_Salmon_SJ46_NC_031129(3)	6
SAL_RB4559AA	L3b	2019	Europe	Denmark	No Transposon	0	No Integron	0	IncFII(S)_1, ColpVC_1	2	PHAGE_Escher_500465_2_NC_049343(4), PHAGE_Salmon_SJ46_NC_031129(3), PHAGE_Phage_Gifsy_2_NC_010393(31), PHAGE_Entero_ST104_NC_005841(48)	4
SRR24215035	L3b	2021	Europe	Netherland	No Transposon	0	No Integron	0	IncFII(S)_1, ColpVC_1	2	PHAGE_Shigel_SfIV_NC_022749(2), PHAGE_Entero_ST104_NC_005841(51), PHAGE_Escher_500465_2_NC_049343(4), PHAGE_Escher_500465_1_NC_049342(12), PHAGE_Salmon_SJ46_NC_031129(3), PHAGE_Phage_Gifsy_2_NC_010393(31)	6
SAL03441	L3b	2013	Asia	China	No Transposon	0	In1440	1	IncFII(S)_1, IncN_1, ColpVC_1	3	PHAGE_Entero_ST104_NC_005841(47), PHAGE_Shigel_SfIV_NC_022749(2), PHAGE_Phage_Gifsy_2_NC_010393(29), PHAGE_Entero_mEp237_NC_019704(3), PHAGE_Escher_500465_2_NC_049343(4), PHAGE_Salmon_SJ46_NC_031129(3), PHAGE_Salmon_Fels_1_NC_010391(5)	7
SAL03447	L3b	2013	Asia	China	No Transposon	0	No Integron	0	IncFII(S)_1, ColpVC_1	2	PHAGE_Entero_ST104_NC_005841(47), PHAGE_Shigel_SfIV_NC_022749(2), PHAGE_Escher_500465_2_NC_049343(4), PHAGE_Salmon_SJ46_NC_031129(3), PHAGE_Phage_Gifsy_2_NC_010393(32)	5
SAL_TA8783AA	L3b	2004	Europe	Germany	No Transposon	0	No Integron	0	IncFII(S)_1, ColpVC_1	2	PHAGE_Phage_Gifsy_2_NC_010393(30), PHAGE_Entero_ST104_NC_005841(49), PHAGE_Shigel_SfIV_NC_022749(2), PHAGE_Salmon_SJ46_NC_031129(3), PHAGE_Escher_500465_2_NC_049343(4)	5
SAL04022	L3b	2017	Asia	China	No Transposon	0	No Integron	0	IncFII(S)_1, ColpVC_1	2	PHAGE_Shigel_SfIV_NC_022749(2), PHAGE_Escher_500465_2_NC_049343(4), PHAGE_Burkho_phiE255_NC_009237(2), PHAGE_Salmon_SJ46_NC_031129(3), PHAGE_Phage_Gifsy_2_NC_010393(31)	5
SAL03311	L3b	2015	Asia	China	No Transposon	0	In498	1	IncFII(S)_1, IncN_1, IncFIB(S)_1, ColpVC_1, IncX1_1	5	PHAGE_Entero_ST104_NC_005841(46), PHAGE_Shigel_SfIV_NC_022749(2), PHAGE_Escher_500465_2_NC_049343(4), PHAGE_Entero_mEp237_NC_019704(3), PHAGE_Phage_Gifsy_2_NC_010393(29), PHAGE_Salmon_SJ46_NC_031129(3), PHAGE_Salmon_118970_sal3_NC_031940(57), PHAGE_Escher_pro483_NC_028943(29), PHAGE_Shigel_Stx_NC_029120(3), PHAGE_Phage_Gifsy_2_NC_010393(5)	10
SRR24215041	L3b	2021	Europe	Netherland	No Transposon	0	No Integron	0	IncFII(S)_1, ColpVC_1	2	PHAGE_Shigel_SfIV_NC_022749(2), PHAGE_Entero_ST104_NC_005841(51), PHAGE_Escher_500465_2_NC_049343(4), PHAGE_Salmon_SJ46_NC_031129(3), PHAGE_Phage_Gifsy_2_NC_010393(31)	5
ERS2630735	L3b	1985	Asia	China	No Transposon	0	No Integron	0	IncFII(S)_1, ColpVC_1	2	PHAGE_Phage_Gifsy_2_NC_010393(32), PHAGE_Escher_500465_2_NC_049343(4), PHAGE_Entero_ST104_NC_005841(47), PHAGE_Shigel_SfIV_NC_022749(2), PHAGE_Clostr_c_st_NC_007581(2), PHAGE_Salmon_SJ46_NC_031129(3)	6
SAL03310	L3b	2015	Asia	China	No Transposon	0	In498	1	IncFII(S)_1, IncN_1, ColpVC_1	3	PHAGE_Shigel_SfIV_NC_022749(2), PHAGE_Entero_ST104_NC_005841(51), PHAGE_Phage_Gifsy_2_NC_010393(29), PHAGE_Entero_mEp237_NC_019704(3), PHAGE_Escher_500465_2_NC_049343(4), PHAGE_Clostr_c_st_NC_007581(2), PHAGE_Salmon_SJ46_NC_031129(3), PHAGE_Salmon_Fels_1_NC_010391(5)	8
SAL_PA7720AA	L3b	1967	Asia	China	No Transposon	0	No Integron	0	IncFII(S)_1	1	PHAGE_Salmon_SJ46_NC_031129(3), PHAGE_Entero_ST104_NC_005841(49), PHAGE_Entero_mEp237_NC_019704(3), PHAGE_Phage_Gifsy_2_NC_010393(29), PHAGE_Shigel_SfIV_NC_022749(2), PHAGE_Escher_500465_2_NC_049343(4), PHAGE_Salmon_RE_2010_NC_019488(38), PHAGE_Salmon_SW9_NC_049459(41)	8
SAL_PA7694AA	L3b	2014	Asia	China	No Transposon	0	No Integron	0	IncFII(S)_1, ColpVC_1	2	PHAGE_Entero_ST104_NC_005841(49), PHAGE_Escher_500465_2_NC_049343(4), PHAGE_Phage_Gifsy_2_NC_010393(31), PHAGE_Entero_mEp237_NC_019704(3), PHAGE_Shigel_SfIV_NC_022749(2), PHAGE_Burkho_BcepMu_NC_005882(2), PHAGE_Salmon_SJ46_NC_031129(3)	7
SAL03332	L3b	2014	Asia	China	No Transposon	0	In498	1	IncFII(S)_1, IncN_1, ColpVC_1	3	PHAGE_Shigel_SfIV_NC_022749(2), PHAGE_Entero_ST104_NC_005841(51), PHAGE_Phage_Gifsy_2_NC_010393(29), PHAGE_Entero_mEp237_NC_019704(3), PHAGE_Escher_500465_2_NC_049343(4), PHAGE_Salmon_SJ46_NC_031129(3), PHAGE_Phage_Gifsy_2_NC_010393(5)	7
SAL_PA7733AA	L3b	2013	Asia	China	No Transposon	0	No Integron	0	IncFII(S)_1	1	PHAGE_Escher_500465_2_NC_049343(4), PHAGE_Shigel_SfIV_NC_022749(2), PHAGE_Entero_ST104_NC_005841(51), PHAGE_Salmon_SJ46_NC_031129(3), PHAGE_Phage_Gifsy_2_NC_010393(30)	5
SAL_PA7973AA	L3b	1965	Asia	China	No Transposon	0	No Integron	0	IncFII(S)_1, ColpVC_1	2	PHAGE_Salmon_SJ46_NC_031129(3), PHAGE_Entero_ST104_NC_005841(47), PHAGE_Shigel_SfIV_NC_022749(2), PHAGE_Phage_Gifsy_2_NC_010393(30), PHAGE_Escher_500465_2_NC_049343(4)	5
