# Supplementary material for: Avian-specific Salmonella transition to endemicity is accompanied by localized resistome and mobilome interaction
Source: eLife. 2025 Mar 4;13:RP101241. doi: 10.7554/eLife.101241 (PMC11879110; doi:10.7554/eLife.101241)
Supplement: Supplementary file 8. — Among 621 ARGs identified in 436 S. Gallinarum biovar Pullorum (bvSP) isolates collected across China, 415 ARGs were found to be located on MGEs. [file elife-101241-supp8.xlsx]

## Sheet: Sheet1
Strain	Biovar	Lineage	Continent	Country	Province	Region	ARGs carried by MGEs (n=415)
SAL03326	bvSP	L3c	Asia	China	Henan	Northern China	tet(A), blaTEM-1B
SAL00724	bvSP	L3b	Asia	China	Jiangsu	Eastern China	None
SAL03290	bvSP	L2b	Asia	China	Henan	Northern China	blaTEM-1B
SAL00700	bvSP	L3b	Asia	China	Jiangsu	Eastern China	sul2, aph(3'')-Ib
SAL04093	bvSP	L3c	Asia	China	Xinjiang	Northern China	blaTEM-1B
SAL_PA7718AA	bvSP	L3b	Asia	China	Henan	Northern China	None
SAL04092	bvSP	L3c	Asia	China	Xinjiang	Northern China	blaTEM-1B
SAL_PA7725AA	bvSP	L3b	Asia	China	Shaanxi	Northern China	blaTEM-1B, sul2, aph(6)-Id
SAL04024	bvSP	L3b	Asia	China	Liaoning	Northern China	None
SAL03440	bvSP	L3c	Asia	China	Anhui	Eastern China	tet(A), blaTEM-1B
SAL00722	bvSP	L2b	Asia	China	Jiangsu	Eastern China	None
SAL03334	bvSP	L3b	Asia	China	Henan	Northern China	tet(A), sul1, aadA5, dfrA17
M36	bvSP	L2b	Asia	China	Zhejiang	Eastern China	None
X17	bvSP	L2b	Asia	China	Zhejiang	Eastern China	None
SAL03330	bvSP	L3c	Asia	China	Henan	Northern China	tet(A), blaTEM-1B
SAL_PA7702AA	bvSP	L3b	Asia	China	Jiangsu	Eastern China	None
TH254	bvSP	L3c	Asia	China	Jiangxi	Eastern China	blaTEM-1B
SAL03328	bvSP	L3c	Asia	China	Henan	Northern China	tet(A), blaTEM-1B
M244	bvSP	L2b	Asia	China	Zhejiang	Eastern China	None
SAL03428	bvSP	L3c	Asia	China	Jiangsu	Eastern China	blaTEM-1B
SAL03422	bvSP	L3c	Asia	China	Guangxi	Southern China	blaTEM-1B
GCA_000462995.1	bvSP	L2a	Asia	China	Heilongjiang	Northern China	None
SAL00730	bvSP	L2b	Asia	China	Anhui	Eastern China	None
SAL_PA7755AA	bvSP	L3b	Asia	China	Jiangsu	Eastern China	None
SAL02669	bvSP	L2b	Asia	China	Shanghai	Eastern China	blaTEM-1B
SAL_PA7740AA	bvSP	L1	Asia	China	Jiangsu	Eastern China	None
SAL04035	bvSP	L3c	Asia	China	Heilongjiang	Northern China	blaTEM-1B, tet(A)
SAL_PA6310AA	bvSP	L3b	Asia	China	Jiangsu	Eastern China	sul2, aph(3'')-Ib, aph(6)-Id, tet(A)
M183	bvSP	L2b	Asia	China	Zhejiang	Eastern China	None
SAL_PA7689AA	bvSP	L3b	Asia	China	Jiangsu	Eastern China	None
X129	bvSP	L2b	Asia	China	Zhejiang	Eastern China	None
7310_combined	bvSP	L1	Asia	China	Jiangsu	Eastern China	None
ERS2630752	bvSP	L3b	Asia	China	Jiangsu	Eastern China	None
SAL03423	bvSP	L3c	Asia	China	Guangxi	Southern China	blaTEM-1B
SAL02657	bvSP	L3c	Asia	China	Shandong	Northern China	blaTEM-1B
SAL_PA7759AA	bvSP	L3c	Asia	China	Henan	Northern China	blaTEM-1B
SAL03421	bvSP	L3c	Asia	China	Guangxi	Southern China	blaTEM-1B
SAL04025	bvSP	L2b	Asia	China	Heilongjiang	Northern China	blaTEM-1B
SAL00712	bvSP	L3b	Asia	China	Jiangsu	Eastern China	dfrA17, aadA5, sul1
M262	bvSP	L2b	Asia	China	Zhejiang	Eastern China	None
SAL03309	bvSP	L3c	Asia	China	Henan	Northern China	blaTEM-1B
SAL_PA7727AA	bvSP	L3b	Asia	China	Jiangsu	Eastern China	None
X186-2	bvSP	L2b	Asia	China	Zhejiang	Eastern China	None
SAL02702	bvSP	L3c	Asia	China	Guangxi	Southern China	blaTEM-1B
SAL03436	bvSP	L2b	Asia	China	Anhui	Eastern China	blaTEM-1B
SAL03287	bvSP	L3b	Asia	China	Henan	Northern China	None
SAL03305	bvSP	L3b	Asia	China	Henan	Northern China	None
X206	bvSP	L2b	Asia	China	Zhejiang	Eastern China	None
E393-2	bvSP	L3b	Asia	China	Zhejiang	Eastern China	None
X159	bvSP	L2b	Asia	China	Zhejiang	Eastern China	None
SAL03321	bvSP	L3b	Asia	China	Henan	Northern China	tet(A), sul1, dfrA17
SAL04094	bvSP	L2b	Asia	China	Xinjiang	Northern China	blaTEM-1B
SAL_PA7971AA	bvSP	L3b	Asia	China	Jiangsu	Eastern China	dfrA17, aadA5, sul1
XXB1725	bvSP	L2b	Asia	China	Hebei	Northern China	blaTEM-1B
M34	bvSP	L2b	Asia	China	Zhejiang	Eastern China	None
SAL02668	bvSP	L2b	Asia	China	Shanghai	Eastern China	blaTEM-1B
SAL00729	bvSP	L2b	Asia	China	Anhui	Eastern China	None
SAL03453	bvSP	L3c	Asia	China	Hubei	Southern China	blaTEM-1B, tet(A)
SAL03302	bvSP	L3c	Asia	China	Henan	Northern China	blaTEM-1B, dfrA17, aadA5
SAL03318	bvSP	L3b	Asia	China	Henan	Northern China	None
SAL03324	bvSP	L3b	Asia	China	Henan	Northern China	None
M9-2	bvSP	L2b	Asia	China	Zhejiang	Eastern China	None
SAL04098	bvSP	L3c	Asia	China	Sichuan	Southern China	blaTEM-1B
MY0186	bvSP	L1	Asia	China	Jiangsu	Eastern China	None
M284	bvSP	L2b	Asia	China	Zhejiang	Eastern China	None
SAL_PA7757AA	bvSP	L3b	Asia	China	Henan	Northern China	None
SAL03331	bvSP	L3b	Asia	China	Henan	Northern China	tet(A), sul1, aadA5, dfrA17
SAL04027	bvSP	L3b	Asia	China	Heilongjiang	Northern China	tet(A), sul2, aph(3'')-Ib, aph(6)-Id
SAL00715	bvSP	L2b	Asia	China	Jiangsu	Eastern China	None
SAL00708	bvSP	L3c	Asia	China	Jiangsu	Eastern China	blaTEM-1B
SAL03323	bvSP	L3b	Asia	China	Henan	Northern China	sul1, aadA5, dfrA17
SAL03297	bvSP	L3c	Asia	China	Henan	Northern China	blaTEM-1B
X124	bvSP	L2b	Asia	China	Zhejiang	Eastern China	None
SAL00741	bvSP	L3b	Asia	China	Jiangsu	Eastern China	aph(6)-Id, aph(3'')-Ib, sul2, tet(A)
M175	bvSP	L2b	Asia	China	Zhejiang	Eastern China	None
SAL02676	bvSP	L3c	Asia	China	Guangdong	Southern China	blaTEM-1B
SAL03397	bvSP	L3c	Asia	China	Gansu	Northern China	blaTEM-1B
7904_combined	bvSP	L1	Asia	China	Jiangsu	Eastern China	None
SAL03438	bvSP	L3c	Asia	China	Hubei	Southern China	blaTEM-1B
SAL03298	bvSP	L3c	Asia	China	Henan	Northern China	blaTEM-1B, tet(A)
SAL02699	bvSP	L3c	Asia	China	Guangxi	Southern China	blaTEM-1B
SAL_PA7698AA	bvSP	L3c	Asia	China	Jiangsu	Eastern China	blaTEM-1B
SAL04102	bvSP	L3c	Asia	China	Sichuan	Southern China	tet(A), blaTEM-1B
X166	bvSP	L2b	Asia	China	Zhejiang	Eastern China	None
M220	bvSP	L2b	Asia	China	Zhejiang	Eastern China	None
SAL04100	bvSP	L3c	Asia	China	Sichuan	Southern China	tet(A), blaTEM-1B
SAL04037	bvSP	L3b	Asia	China	Heilongjiang	Northern China	sul1, aadA5, dfrA17
X38	bvSP	L2b	Asia	China	Zhejiang	Eastern China	None
SAL02679	bvSP	L3b	Asia	China	Guangdong	Southern China	None
SAL03506	bvSP	L2b	Asia	China	Shanxi	Northern China	None
SAL_PA7704AA	bvSP	L2b	Asia	China	Jiangsu	Eastern China	None
SAL02664	bvSP	L3c	Asia	China	Shandong	Northern China	blaTEM-1B
TH256	bvSP	L3c	Asia	China	Jiangxi	Eastern China	blaTEM-1B
M292	bvSP	L2b	Asia	China	Zhejiang	Eastern China	None
SAL02681	bvSP	L3c	Asia	China	Guangdong	Southern China	blaTEM-1B
SAL04017	bvSP	L3c	Asia	China	Heilongjiang	Northern China	blaTEM-1B
SAL_PA7730AA	bvSP	L3c	Asia	China	Anhui	Eastern China	blaTEM-1B
M277	bvSP	L2b	Asia	China	Zhejiang	Eastern China	None
SAL03386	bvSP	L3b	Asia	China	Jiangsu	Eastern China	blaTEM-1B, sul1, aadA5, dfrA17
SAL_PA7756AA	bvSP	L2b	Asia	China	Jiangsu	Eastern China	None
ERS2630720	bvSP	L3b	Asia	China	Jiangsu	Eastern China	None
SAL03435	bvSP	L3c	Asia	China	Shandong	Northern China	blaTEM-1B
SAL04026	bvSP	L2b	Asia	China	Heilongjiang	Northern China	blaTEM-1B
M127	bvSP	L2b	Asia	China	Zhejiang	Eastern China	None
M285	bvSP	L2b	Asia	China	Zhejiang	Eastern China	None
SAL03296	bvSP	L3c	Asia	China	Henan	Northern China	blaTEM-1B, tet(A)
SAL03408	bvSP	L3c	Asia	China	Guangxi	Southern China	blaTEM-1B
SAL_PA7758AA	bvSP	L3b	Asia	China	Jiangsu	Eastern China	None
MY0189	bvSP	L3b	Asia	China	Beijing	Northern China	None
SAL04030	bvSP	L3b	Asia	China	Heilongjiang	Northern China	sul1, aadA5, dfrA17
SAL02694	bvSP	L3b	Asia	China	Guangxi	Southern China	dfrA17, aadA5, sul1, tet(A)
SAL00747	bvSP	L3b	Asia	China	Jiangsu	Eastern China	tet(A), aph(6)-Id, aph(3'')-Ib, sul2
X2	bvSP	L2b	Asia	China	Zhejiang	Eastern China	None
SAL03395	bvSP	L1	Asia	China	Guangxi	Southern China	None
SAL_PA7711AA	bvSP	L3b	Asia	China	Jiangsu	Eastern China	None
SAL00745	bvSP	L3b	Asia	China	Jiangsu	Eastern China	dfrA17, aadA5, sul1
SAL_PA7724AA	bvSP	L3b	Asia	China	Jiangsu	Eastern China	None
SAL00717	bvSP	L3c	Asia	China	Jiangsu	Eastern China	blaTEM-1B, tet(A)
SAL_PA7708AA	bvSP	L3b	Asia	China	Beijing	Northern China	None
SAL00734	bvSP	L3c	Asia	China	Jiangsu	Eastern China	blaTEM-1B, tet(A)
ERS2630765	bvSP	L3b	Asia	China	Jiangsu	Eastern China	None
M198	bvSP	L2b	Asia	China	Zhejiang	Eastern China	None
ERS2630722	bvSP	L3b	Asia	China	Jiangsu	Eastern China	None
SAL02654	bvSP	L3c	Asia	China	Shandong	Northern China	blaTEM-1B, tet(A)
E404	bvSP	L2b	Asia	China	Zhejiang	Eastern China	blaTEM-1B
M312	bvSP	L2b	Asia	China	Zhejiang	Eastern China	None
SAL03415	bvSP	L3c	Asia	China	Guangxi	Southern China	blaTEM-1B, tet(A)
SAL02674	bvSP	L3c	Asia	China	Guangdong	Southern China	blaTEM-1B
ERS2630790	bvSP	L1	Asia	China	Jiangsu	Eastern China	None
SAL04091	bvSP	L2b	Asia	China	Xinjiang	Northern China	blaTEM-1B
SAL_PA7983AA	bvSP	L3b	Asia	China	Jiangsu	Eastern China	None
SAL03308	bvSP	L2b	Asia	China	Henan	Northern China	blaTEM-1B
X6	bvSP	L2b	Asia	China	Zhejiang	Eastern China	None
M9-4	bvSP	L2b	Asia	China	Zhejiang	Eastern China	None
SAL03394	bvSP	L1	Asia	China	Guangxi	Southern China	None
SAL_PA7705AA	bvSP	L3b	Asia	China	Jiangsu	Eastern China	None
SAL02695	bvSP	L3b	Asia	China	Guangxi	Southern China	tet(A), sul1, aadA5, dfrA17
SAL04101	bvSP	L3c	Asia	China	Sichuan	Southern China	tet(A), blaTEM-1B
ERS2630744	bvSP	L3b	Asia	China	Jiangsu	Eastern China	sul1, aadA5, dfrA17
SAL02661	bvSP	L3c	Asia	China	Shandong	Northern China	blaTEM-1B, tet(A)
M241	bvSP	L2b	Asia	China	Zhejiang	Eastern China	None
ERS2630738	bvSP	L3b	Asia	China	Jiangsu	Eastern China	None
SAL04018	bvSP	L3c	Asia	China	Heilongjiang	Northern China	blaTEM-1B
SAL_PA7703AA	bvSP	L3b	Asia	China	Anhui	Eastern China	tet(A), sul1, dfrA17
SAL03285	bvSP	L3b	Asia	China	Henan	Northern China	None
X89	bvSP	L2b	Asia	China	Zhejiang	Eastern China	None
SAL02700	bvSP	L3c	Asia	China	Guangxi	Southern China	blaTEM-1B
SAL_PA7737AA	bvSP	L3b	Asia	China	Anhui	Eastern China	sul1, dfrA17
SAL03419	bvSP	L3c	Asia	China	Guangxi	Southern China	blaTEM-1B, tet(A)
SAL_PA7975AA	bvSP	L3b	Asia	China	NA	Not collect	None
SAL00714	bvSP	L3b	Asia	China	Jiangsu	Eastern China	tet(A), sul1, aadA5, dfrA17
SAL03392	bvSP	L3b	Asia	China	Guangxi	Southern China	None
X216	bvSP	L2b	Asia	China	Zhejiang	Eastern China	None
M205	bvSP	L2b	Asia	China	Zhejiang	Eastern China	None
SAL03413	bvSP	L3c	Asia	China	Guangxi	Southern China	blaTEM-1B
SAL02675	bvSP	L3c	Asia	China	Guangdong	Southern China	blaTEM-1B
X5	bvSP	L2b	Asia	China	Zhejiang	Eastern China	None
SAL03335	bvSP	L3b	Asia	China	Henan	Northern China	None
SAL03448	bvSP	L3c	Asia	China	Henan	Northern China	blaTEM-1B
SAL03439	bvSP	L2b	Asia	China	Anhui	Eastern China	blaTEM-1B
SAL00742	bvSP	L3b	Asia	China	Jiangsu	Eastern China	None
SAL03403	bvSP	L3c	Asia	China	Gansu	Northern China	blaTEM-1B
SAL00746	bvSP	L3c	Asia	China	Jiangsu	Eastern China	blaTEM-1B
SAL03313	bvSP	L3b	Asia	China	Henan	Northern China	None
X90	bvSP	L2b	Asia	China	Zhejiang	Eastern China	None
X113	bvSP	L2b	Asia	China	Zhejiang	Eastern China	None
X130	bvSP	L2b	Asia	China	Zhejiang	Eastern China	None
SAL02649	bvSP	L2b	Asia	China	Guangxi	Southern China	blaTEM-1B
SAL_PA7974AA	bvSP	L3b	Asia	China	Jiangsu	Eastern China	None
SAL03446	bvSP	L3b	Asia	China	Hubei	Southern China	None
SAL04020	bvSP	L3c	Asia	China	Heilongjiang	Northern China	blaTEM-1B
SAL04023	bvSP	L3b	Asia	China	Liaoning	Northern China	None
SAL03593	bvSP	L3c	Asia	China	Guangxi	Southern China	blaTEM-1B
X177-2	bvSP	L2b	Asia	China	Zhejiang	Eastern China	None
SAL_PA7754AA	bvSP	L3b	Asia	China	Beijing	Northern China	None
ERS2630732	bvSP	L3b	Asia	China	Jiangsu	Eastern China	None
SAL_PA7734AA	bvSP	L3b	Asia	China	Shaanxi	Northern China	None
SAL02651	bvSP	L3c	Asia	China	Shandong	Northern China	blaTEM-1B
SAL00713	bvSP	L3b	Asia	China	Jiangsu	Eastern China	dfrA17, aadA5, sul1, tet(A)
SAL03294	bvSP	L3c	Asia	China	Henan	Northern China	blaTEM-1B, tet(A)
SAL03307	bvSP	L2b	Asia	China	Henan	Northern China	blaTEM-1B
SAL_PA7722AA	bvSP	L3b	Asia	China	Xinjiang	Northern China	None
X187	bvSP	L2b	Asia	China	Zhejiang	Eastern China	None
SAL03289	bvSP	L3b	Asia	China	Henan	Northern China	dfrA17, aadA5, sul1, tet(A)
SAL03426	bvSP	L3c	Asia	China	Jiangsu	Eastern China	tet(A), blaTEM-1B
M162	bvSP	L2b	Asia	China	Zhejiang	Eastern China	None
ERS2630728	bvSP	L3b	Asia	China	Beijing	Northern China	None
SAL_PA7716AA	bvSP	L3b	Asia	China	Jiangsu	Eastern China	dfrA17, aadA5, sul1
SAL02652	bvSP	L3c	Asia	China	Shandong	Northern China	blaTEM-1B, tet(A)
SAL_PA7692AA	bvSP	L2b	Asia	China	Jiangsu	Eastern China	None
SAL03295	bvSP	L3c	Asia	China	Henan	Northern China	blaTEM-1B, tet(A)
SAL03433	bvSP	L3c	Asia	China	Jiangsu	Eastern China	blaTEM-1B
SAL_PA7695AA	bvSP	L3b	Asia	China	Shaanxi	Northern China	tet(A), blaTEM-1B, aph(6)-Id, aph(3'')-Ib, sul2
XXB1089	bvSP	L2b	Asia	China	Shanghai	Eastern China	None
SAL00736	bvSP	L3b	Asia	China	Jiangsu	Eastern China	None
SAL03432	bvSP	L3c	Asia	China	Jiangsu	Eastern China	blaTEM-1B
TH260	bvSP	L3c	Asia	China	Jiangxi	Eastern China	blaTEM-1B
SAL02650	bvSP	L2b	Asia	China	Guangxi	Southern China	blaTEM-1B
SAL03391	bvSP	L3b	Asia	China	Beijing	Northern China	None
C15_FKDN220483769-1A_H25LVDSX5_L3	bvSP	L3c	Asia	China	Guangxi	Southern China	blaTEM-1B
SAL00718	bvSP	L3c	Asia	China	Jiangsu	Eastern China	blaTEM-1B
SAL04099	bvSP	L3c	Asia	China	Sichuan	Southern China	blaTEM-1B
SAL_GB9917AA	bvSP	L3c	Asia	China	Yunnan	Southern China	sul2, blaTEM-1B
SAL02662	bvSP	L3c	Asia	China	Shandong	Northern China	blaTEM-1B
SAL03429	bvSP	L3c	Asia	China	Jiangsu	Eastern China	blaTEM-1B
MY0185	bvSP	L3b	Asia	China	Jiangsu	Eastern China	None
SAL03314	bvSP	L3c	Asia	China	Henan	Northern China	blaTEM-1B, tet(A)
ERS2630718	bvSP	L3b	Asia	China	Jiangsu	Eastern China	None
SAL_PA7696AA	bvSP	L3c	Asia	China	Jiangsu	Eastern China	blaTEM-1B
SAL03388	bvSP	L3b	Asia	China	Jiangsu	Eastern China	blaTEM-1B
ERS2630811	bvSP	L3c	Asia	China	Henan	Northern China	blaTEM-1B, tet(A)
SAL_PA7693AA	bvSP	L3b	Asia	China	Anhui	Eastern China	None
SAL03407	bvSP	L3c	Asia	China	Guangxi	Southern China	blaTEM-1B, tet(A)
M47	bvSP	L2b	Asia	China	Zhejiang	Eastern China	None
SAL03431	bvSP	L3c	Asia	China	Anhui	Eastern China	tet(A), blaTEM-1B
SAL_PA7736AA	bvSP	L3b	Asia	China	Jiangsu	Eastern China	None
SAL03329	bvSP	L3c	Asia	China	Henan	Northern China	tet(A), blaTEM-1B
SAL02667	bvSP	L2b	Asia	China	Shanghai	Eastern China	blaTEM-1B
SAL03325	bvSP	L3c	Asia	China	Henan	Northern China	blaTEM-1B
SAL_PA7701AA	bvSP	L3c	Asia	China	Anhui	Eastern China	blaTEM-1B
SAL02663	bvSP	L3c	Asia	China	Shandong	Northern China	blaTEM-1B, tet(A)
SAL00732	bvSP	L2b	Asia	China	Jiangsu	Eastern China	None
X170	bvSP	L2b	Asia	China	Zhejiang	Eastern China	None
SAL03319	bvSP	L3b	Asia	China	Henan	Northern China	tet(A), aph(6)-Id, aph(3'')-Ib, sul2
M123	bvSP	L2b	Asia	China	Zhejiang	Eastern China	None
SAL03507	bvSP	L2b	Asia	China	Shandong	Northern China	None
ERS2630729	bvSP	L3b	Asia	China	Beijing	Northern China	None
SAL02672	bvSP	L2b	Asia	China	Shanghai	Eastern China	blaTEM-1B
X97	bvSP	L2b	Asia	China	Zhejiang	Eastern China	None
X13	bvSP	L2b	Asia	China	Zhejiang	Eastern China	None
SAL_PA7745AA	bvSP	L3c	Asia	China	Anhui	Eastern China	blaTEM-1B
SAL02671	bvSP	L2b	Asia	China	Shanghai	Eastern China	blaTEM-1B
7808_combined	bvSP	L1	Asia	China	Jiangsu	Eastern China	None
SAL02648	bvSP	L2b	Asia	China	Guangxi	Southern China	blaTEM-1B
SAL03417	bvSP	L3c	Asia	China	Guangxi	Southern China	blaTEM-1B
SAL00710	bvSP	L3b	Asia	China	Jiangsu	Eastern China	None
X169	bvSP	L2b	Asia	China	Zhejiang	Eastern China	None
SAL03404	bvSP	L3b	Asia	China	Heilongjiang	Northern China	dfrA17, aadA5, sul1, tet(A)
X215	bvSP	L2b	Asia	China	Zhejiang	Eastern China	None
SAL03317	bvSP	L3b	Asia	China	Henan	Northern China	None
SAL04029	bvSP	L2b	Asia	China	Heilongjiang	Northern China	blaTEM-1B
SAL03416	bvSP	L3c	Asia	China	Guangxi	Southern China	blaTEM-1B
E388-2	bvSP	L3b	Asia	China	Zhejiang	Eastern China	None
SAL03615	bvSP	L3c	Asia	China	Guangdong	Southern China	tet(A), blaTEM-1B
SAL04036	bvSP	L3b	Asia	China	Heilongjiang	Northern China	None
E392-2	bvSP	L3b	Asia	China	Zhejiang	Eastern China	None
M207	bvSP	L2b	Asia	China	Zhejiang	Eastern China	None
SAL03434	bvSP	L3c	Asia	China	Shandong	Northern China	blaTEM-1B
TH261	bvSP	L3c	Asia	China	Jiangxi	Eastern China	blaTEM-1B
SAL03333	bvSP	L3b	Asia	China	Henan	Northern China	tet(A), sul1, aadA5, dfrA17
SAL04097	bvSP	L3c	Asia	China	Sichuan	Southern China	blaTEM-1B
SAL04028	bvSP	L2b	Asia	China	Heilongjiang	Northern China	blaTEM-1B
X10	bvSP	L2b	Asia	China	Zhejiang	Eastern China	None
X177	bvSP	L2b	Asia	China	Zhejiang	Eastern China	None
SAL03282	bvSP	L3c	Asia	China	Henan	Northern China	blaTEM-1B
SAL03292	bvSP	L3c	Asia	China	Henan	Northern China	tet(A), blaTEM-1B
SAL02703	bvSP	L3b	Asia	China	Guangxi	Southern China	tet(A), dfrA17, aadA5, sul1
SAL_PA7976AA	bvSP	L3b	Asia	China	Sichuan	Southern China	blaTEM-1B, aph(6)-Id, aph(3'')-Ib, sul2
SAL03442	bvSP	L3b	Asia	China	Henan	Northern China	None
SAL04031	bvSP	L3c	Asia	China	Heilongjiang	Northern China	tet(A), blaTEM-1B
X186	bvSP	L2b	Asia	China	Zhejiang	Eastern China	None
SAL_PA7686AA	bvSP	L3c	Asia	China	Jiangsu	Eastern China	blaTEM-1B
X176	bvSP	L2b	Asia	China	Zhejiang	Eastern China	None
M281	bvSP	L2b	Asia	China	Zhejiang	Eastern China	None
SAL04021	bvSP	L3b	Asia	China	Liaoning	Northern China	None
E388-1	bvSP	L3b	Asia	China	Zhejiang	Eastern China	None
SAL00739	bvSP	L3c	Asia	China	Jiangsu	Eastern China	blaTEM-1B
SAL_PA7699AA	bvSP	L1	Asia	China	Henan	Northern China	None
SAL03430	bvSP	L3c	Asia	China	Jiangsu	Eastern China	blaTEM-1B, sul1, aadA5, dfrA17
SAL02680	bvSP	L3b	Asia	China	Guangdong	Southern China	tet(A), dfrA17, aadA5, sul1
SAL02670	bvSP	L2b	Asia	China	Shanghai	Eastern China	blaTEM-1B
SAL00711	bvSP	L3b	Asia	China	Jiangsu	Eastern China	dfrA17, aadA5, sul1, tet(A)
SAL03443	bvSP	L3b	Asia	China	Henan	Northern China	None
SAL02696	bvSP	L3b	Asia	China	Guangxi	Southern China	tet(A), dfrA17, aadA5, sul1
SAL03449	bvSP	L3c	Asia	China	Henan	Northern China	blaTEM-1B
SAL03411	bvSP	L3c	Asia	China	Guangxi	Southern China	blaTEM-1B, tet(A)
SAL02665	bvSP	L3c	Asia	China	Shandong	Northern China	blaTEM-1B
M9-1	bvSP	L2b	Asia	China	Zhejiang	Eastern China	None
SAL02673	bvSP	L2b	Asia	China	Shanghai	Eastern China	blaTEM-1B
SAL04090	bvSP	L2b	Asia	China	Xinjiang	Northern China	blaTEM-1B
SAL_PA7747AA	bvSP	L3b	Asia	China	Jiangsu	Eastern China	None
SAL04095	bvSP	L2b	Asia	China	Xinjiang	Northern China	blaTEM-1B
SAL04033	bvSP	L3b	Asia	China	Heilongjiang	Northern China	None
SAL03414	bvSP	L3c	Asia	China	Guangxi	Southern China	blaTEM-1B
SAL03437	bvSP	L2b	Asia	China	Anhui	Eastern China	blaTEM-1B
SAL_PA7719AA	bvSP	L3c	Asia	China	Jiangsu	Eastern China	blaTEM-1B
SAL_PA7741AA	bvSP	L3b	Asia	China	Jiangsu	Eastern China	tet(A), aph(6)-Id, aph(3'')-Ib, sul2
SAL02697	bvSP	L3b	Asia	China	Guangxi	Southern China	tet(A), aadA5, sul1
ERS2630739	bvSP	L3b	Asia	China	Jiangsu	Eastern China	None
SAL03301	bvSP	L3c	Asia	China	Henan	Northern China	blaTEM-1B
X79	bvSP	L2b	Asia	China	Zhejiang	Eastern China	None
SAL03304	bvSP	L3c	Asia	China	Henan	Northern China	tet(A), blaTEM-1B
SAL03396	bvSP	L3b	Asia	China	Gansu	Northern China	None
SAL03497	bvSP	L2b	Asia	China	Shandong	Northern China	None
SAL00744	bvSP	L3c	Asia	China	Anhui	Eastern China	blaTEM-1B
SAL02677	bvSP	L3c	Asia	China	Guangdong	Southern China	tet(A), blaTEM-1B
SAL03316	bvSP	L3b	Asia	China	Henan	Northern China	sul1, aadA5, dfrA17
C49_FKDN220483803-1A_H25LVDSX5_L1	bvSP	L3c	Asia	China	Guangxi	Southern China	blaTEM-1B
M307	bvSP	L2b	Asia	China	Zhejiang	Eastern China	None
SAL00735	bvSP	L3c	Asia	China	Jiangsu	Eastern China	blaTEM-1B
SRR26662937	bvSP	L3c	Asia	China	Shandong	Northern China	blaTEM-1B
SRR26663521	bvSP	L2b	Asia	China	Shandong	Northern China	None
X153	bvSP	L2b	Asia	China	Zhejiang	Eastern China	None
SAL_PA7700AA	bvSP	L3b	Asia	China	Jiangsu	Eastern China	blaTEM-1B, sul2, aph(3'')-Ib, aph(6)-Id
X67	bvSP	L2b	Asia	China	Zhejiang	Eastern China	None
SAL03337	bvSP	L3b	Asia	China	Henan	Northern China	None
M113	bvSP	L2b	Asia	China	Zhejiang	Eastern China	None
X134	bvSP	L2b	Asia	China	Zhejiang	Eastern China	None
SAL03293	bvSP	L3c	Asia	China	Henan	Northern China	tet(A), blaTEM-1B
SAL03320	bvSP	L3b	Asia	China	Henan	Northern China	tet(A), aph(6)-Id, aph(3'')-Ib, sul2
SAL03286	bvSP	L2b	Asia	China	Henan	Northern China	blaTEM-1B
SAL_KA3505AA	bvSP	L2b	Asia	China	Jiangsu	Eastern China	None
SAL03418	bvSP	L3c	Asia	China	Guangxi	Southern China	blaTEM-1B
SAL03312	bvSP	L3b	Asia	China	Henan	Northern China	dfrA17, aadA5, sul1, tet(A), blaTEM-1B
TH184	bvSP	L3b	Asia	China	Jiangxi	Eastern China	None
SAL03452	bvSP	L3c	Asia	China	Hubei	Southern China	blaTEM-1B
SAL_PA7746AA	bvSP	L3b	Asia	China	Jiangsu	Eastern China	None
SAL00726	bvSP	L2b	Asia	China	Jiangsu	Eastern China	None
SAL03303	bvSP	L2b	Asia	China	Henan	Northern China	blaTEM-1B
SAL03409	bvSP	L3c	Asia	China	Guangxi	Southern China	blaTEM-1B, tet(A)
X19	bvSP	L2b	Asia	China	Zhejiang	Eastern China	None
SAL02698	bvSP	L3c	Asia	China	Guangxi	Southern China	blaTEM-1B
SAL00725	bvSP	L3c	Asia	China	Jiangsu	Eastern China	blaTEM-1B
SAL02656	bvSP	L3c	Asia	China	Shandong	Northern China	blaTEM-1B, tet(A)
C13_FKDN220485113-1A_H25L7DSX5_L2	bvSP	L3c	Asia	China	Guangxi	Southern China	blaTEM-1B
X82	bvSP	L2b	Asia	China	Zhejiang	Eastern China	None
M275	bvSP	L2b	Asia	China	Zhejiang	Eastern China	None
SAL03300	bvSP	L3c	Asia	China	Henan	Northern China	blaTEM-1B
SAL00705	bvSP	L3b	Asia	China	Jiangsu	Eastern China	aph(6)-Id, aph(3'')-Ib, sul2
X105	bvSP	L2b	Asia	China	Zhejiang	Eastern China	None
SAL00738	bvSP	L3c	Asia	China	Jiangsu	Eastern China	blaTEM-1B
SAL_PA7710AA	bvSP	L2b	Asia	China	Jiangsu	Eastern China	None
X98	bvSP	L2b	Asia	China	Zhejiang	Eastern China	None
ERS2630724	bvSP	L3b	Asia	China	Jiangsu	Eastern China	None
SAL03385	bvSP	L3b	Asia	China	Jiangsu	Eastern China	blaTEM-1B
SAL_UA3243AA	bvSP	L3c	Asia	China	Henan	Northern China	blaTEM-1B, tet(A)
SAL03444	bvSP	L3b	Asia	China	Hubei	Southern China	None
X230	bvSP	L2b	Asia	China	Zhejiang	Eastern China	None
SAL_PA7713AA	bvSP	L3b	Asia	China	Jiangsu	Eastern China	None
SAL00743	bvSP	L3c	Asia	China	Jiangsu	Eastern China	blaTEM-1B
SAL03402	bvSP	L2b	Asia	China	Gansu	Northern China	blaTEM-1B
SAL03315	bvSP	L3c	Asia	China	Henan	Northern China	tet(A), blaTEM-1B
SAL_PA7707AA	bvSP	L3b	Asia	China	Jiangsu	Eastern China	tet(A), sul1, aadA5, dfrA17
SAL00707	bvSP	L3b	Asia	China	Jiangsu	Eastern China	None
M303	bvSP	L2b	Asia	China	Zhejiang	Eastern China	None
SAL03327	bvSP	L3c	Asia	China	Henan	Northern China	tet(A), blaTEM-1B
SAL02658	bvSP	L3c	Asia	China	Shandong	Northern China	blaTEM-1B, tet(A)
R51	bvSP	L3c	Asia	China	Anhui	Eastern China	None
X165	bvSP	L2b	Asia	China	Zhejiang	Eastern China	None
SAL02653	bvSP	L3c	Asia	China	Shandong	Northern China	blaTEM-1B
SAL_PA7750AA	bvSP	L3b	Asia	China	Henan	Northern China	None
X26	bvSP	L2b	Asia	China	Zhejiang	Eastern China	None
SAL04034	bvSP	L3c	Asia	China	Heilongjiang	Northern China	blaTEM-1B
SAL_PA7970AA	bvSP	L3b	Asia	China	Jiangsu	Eastern China	dfrA17, sul1, tet(A)
SAL03445	bvSP	L3b	Asia	China	Hubei	Southern China	None
M29	bvSP	L2b	Asia	China	Zhejiang	Eastern China	None
E392-1	bvSP	L3b	Asia	China	Zhejiang	Eastern China	None
SAL_PA7977AA	bvSP	L3b	Asia	China	Jiangsu	Eastern China	None
M90-1	bvSP	L2b	Asia	China	Zhejiang	Eastern China	None
X84	bvSP	L2b	Asia	China	Zhejiang	Eastern China	None
SAL04096	bvSP	L3c	Asia	China	Sichuan	Southern China	blaTEM-1B
SAL_PA7749AA	bvSP	L3b	Asia	China	Jiangsu	Eastern China	None
SAL00728	bvSP	L2b	Asia	China	Jiangsu	Eastern China	None
SAL02666	bvSP	L2b	Asia	China	Shanghai	Eastern China	None
SAL_PA7753AA	bvSP	L3b	Asia	China	Jiangsu	Eastern China	dfrA17, aadA5, sul1
X65	bvSP	L2b	Asia	China	Zhejiang	Eastern China	None
SAL03401	bvSP	L3c	Asia	China	Gansu	Northern China	blaTEM-1B
SAL00740	bvSP	L3b	Asia	China	Jiangsu	Eastern China	sul2, aph(3'')-Ib, aph(6)-Id, tet(A), blaTEM-116
SAL02659	bvSP	L3c	Asia	China	Shandong	Northern China	blaTEM-1B, tet(A)
SAL03390	bvSP	L3b	Asia	China	Jiangsu	Eastern China	None
X140	bvSP	L2b	Asia	China	Zhejiang	Eastern China	None
SAL03288	bvSP	L3c	Asia	China	Henan	Northern China	blaTEM-1B, tet(A)
SAL03420	bvSP	L3c	Asia	China	Guangxi	Southern China	blaTEM-1B
SAL_PA7729AA	bvSP	L3c	Asia	China	Shandong	Northern China	blaTEM-1B
SAL03496	bvSP	L2b	Asia	China	Shanxi	Northern China	None
SAL00731	bvSP	L2b	Asia	China	Jiangsu	Eastern China	None
SAL03291	bvSP	L2b	Asia	China	Henan	Northern China	blaTEM-1B
X207	bvSP	L2b	Asia	China	Zhejiang	Eastern China	None
M227	bvSP	L2b	Asia	China	Zhejiang	Eastern China	None
E393-1	bvSP	L3b	Asia	China	Zhejiang	Eastern China	None
SAL02660	bvSP	L3c	Asia	China	Shandong	Northern China	tet(A), blaTEM-1B
SAL04019	bvSP	L3c	Asia	China	Heilongjiang	Northern China	blaTEM-1B
SAL_PA7742AA	bvSP	L2b	Asia	China	Jiangsu	Eastern China	None
M9-3	bvSP	L2b	Asia	China	Zhejiang	Eastern China	None
SAL_PA7717AA	bvSP	L2b	Asia	China	Jiangsu	Eastern China	None
TH255	bvSP	L3c	Asia	China	Jiangxi	Eastern China	blaTEM-1B
SAL00737	bvSP	L3c	Asia	China	Jiangsu	Eastern China	blaTEM-1B, tet(A)
M206	bvSP	L2b	Asia	China	Zhejiang	Eastern China	None
SAL_PA7723AA	bvSP	L3c	Asia	China	Shandong	Northern China	blaTEM-1B
M132	bvSP	L2b	Asia	China	Zhejiang	Eastern China	None
SAL04032	bvSP	L3c	Asia	China	Heilongjiang	Northern China	blaTEM-1B, tet(A)
SAL02647	bvSP	L2b	Asia	China	Hubei	Southern China	blaTEM-1B
X237	bvSP	L2b	Asia	China	Zhejiang	Eastern China	None
X145	bvSP	L2b	Asia	China	Zhejiang	Eastern China	None
SAL03322	bvSP	L3b	Asia	China	Henan	Northern China	sul1, dfrA17
SAL_PA0702AA	bvSP	L3b	Asia	China	Jiangsu	Eastern China	sul2, aph(3'')-Ib, aph(6)-Id, tet(A)
SAL_PA7752AA	bvSP	L3b	Asia	China	Henan	Northern China	dfrA17, aadA5, sul1
SAL_PA7706AA	bvSP	L3b	Asia	China	Jiangsu	Eastern China	None
M313	bvSP	L2b	Asia	China	Zhejiang	Eastern China	None
M163	bvSP	L2b	Asia	China	Zhejiang	Eastern China	None
X80	bvSP	L2b	Asia	China	Zhejiang	Eastern China	None
SAL03441	bvSP	L3b	Asia	China	Henan	Northern China	sul1, aadA5, dfrA17
SAL03447	bvSP	L3b	Asia	China	Hubei	Southern China	None
X49	bvSP	L2b	Asia	China	Zhejiang	Eastern China	None
SAL03306	bvSP	L2b	Asia	China	Henan	Northern China	blaTEM-1B
SAL04022	bvSP	L3b	Asia	China	Liaoning	Northern China	None
SAL03311	bvSP	L3b	Asia	China	Henan	Northern China	dfrA17, aadA5, sul1, tet(A)
SAL03450	bvSP	L3c	Asia	China	Hubei	Southern China	blaTEM-1B
M265	bvSP	L2b	Asia	China	Zhejiang	Eastern China	None
SAL03425	bvSP	L3c	Asia	China	Jiangsu	Eastern China	tet(A), blaTEM-1B
ERS2630735	bvSP	L3b	Asia	China	Jiangsu	Eastern China	None
SAL03310	bvSP	L3b	Asia	China	Henan	Northern China	dfrA17, aadA5, sul1, tet(A)
TH259	bvSP	L3c	Asia	China	Jiangxi	Eastern China	blaTEM-1B
X93	bvSP	L2b	Asia	China	Zhejiang	Eastern China	None
X195	bvSP	L2b	Asia	China	Zhejiang	Eastern China	None
TH257	bvSP	L3c	Asia	China	Jiangxi	Eastern China	blaTEM-1B
SAL03427	bvSP	L3c	Asia	China	Anhui	Eastern China	blaTEM-1B
SAL_PA7721AA	bvSP	L2b	Asia	China	Jiangsu	Eastern China	None
M134	bvSP	L2b	Asia	China	Zhejiang	Eastern China	None
SAL_PA7720AA	bvSP	L3b	Asia	China	Jiangsu	Eastern China	None
SAL03451	bvSP	L3c	Asia	China	Hubei	Southern China	blaTEM-1B
X156	bvSP	L2b	Asia	China	Zhejiang	Eastern China	None
SAL_PA7694AA	bvSP	L3b	Asia	China	Henan	Northern China	None
X135	bvSP	L2b	Asia	China	Zhejiang	Eastern China	None
SAL03332	bvSP	L3b	Asia	China	Henan	Northern China	dfrA17, aadA5, sul1, tet(A)
MY0188	bvSP	L2a	Asia	China	Beijing	Northern China	None
SAL02678	bvSP	L3c	Asia	China	Guangdong	Southern China	blaTEM-1B
SAL_PA7687AA	bvSP	L2b	Asia	China	Jiangsu	Eastern China	None
SAL_PA7733AA	bvSP	L3b	Asia	China	Jiangsu	Eastern China	None
SAL_PA7973AA	bvSP	L3b	Asia	China	Beijing	Northern China	None
SAL00733	bvSP	L2b	Asia	China	Jiangsu	Eastern China	None
6801_combined	bvSP	L1	Asia	China	Jiangsu	Eastern China	None
SAL02701	bvSP	L3c	Asia	China	Guangxi	Southern China	blaTEM-1B
SAL03405	bvSP	L2a	Asia	China	Guangxi	Southern China	None
XXB1092	bvSP	L2b	Asia	China	Shanghai	Eastern China	blaTEM-1B
SAL03406	bvSP	L3c	Asia	China	Guangxi	Southern China	blaTEM-1B, tet(A)
