# Supplementary material for: Avian-specific Salmonella transition to endemicity is accompanied by localized resistome and mobilome interaction
Source: eLife. 2025 Mar 4;13:RP101241. doi: 10.7554/eLife.101241 (PMC11879110; doi:10.7554/eLife.101241)
Supplement: Supplementary file 9. — Using the HGTphyloDetect pipeline, we calculated the Alien Index (AI) score and out_perc values for each ARG sequences. ARGs with AI score≥45 and out_perc≥90% were identified as potential candidates for horizontal ARGs transfer. Additionally, based on BLAST hit scores, we determined the most likely donor organisms for these ARGs. [file elife-101241-supp9.xlsx]

## Sheet: Sheet1
ARGs Type	Alien index	out_perc	Donor id	Donor taxonomy
blaTEM-1B	460.52	>90%	MES4015624	Bacteria/Pseudomonadota
sul1	460.52	>90%	AFB76381	Bacteria/Pseudomonadota
drfA17	250.47	>90%	AYU68941	Bacteria/Pseudomonadota
aadA5	460.52	>90%	TQO23528	Bacteria/Actinomycetota
sul2	460.52	>90%	ADX92851	Bacteria/Pseudomonadota
aph(3'')-Ib_Type1	460.52	>90%	EEW6399195	Bacteria/Pseudomonadota
aph(3'')-Ib_Type2	460.52	>90%	WP_404997267	Bacteria/Pseudomonadota
tet(A)_Type1	460.52	>90%	EMG61192	Bacteria/Pseudomonadota
tet(A)_Type2	460.52	>90%	ACY86419	Bacteria/Pseudomonadota
tet(A)_Type3	460.52	>90%	AAM22221	Bacteria/Pseudomonadota
tet(A)_Type4	460.52	>90%	AAM22221	Bacteria/Pseudomonadota
aph(6)-Id_Type1	460.52	>90%	WP_250188255	Bacteria/Pseudomonadota
aph(6)-Id_Type2	460.52	>90%	WP_269719291	Bacteria/Pseudomonadota
aph(6)-Id_Type3	460.52	>90%	WP_250186589	Bacteria/Pseudomonadota
